# Supplementary material for: OsQHB Improves Salt Tolerance by Scavenging Reactive Oxygen Species in Rice
Source: Front Plant Sci. 2022 May 4;13:848891. doi: 10.3389/fpls.2022.848891 (PMC9115556; doi:10.3389/fpls.2022.848891)
Supplement: Supplementary file 3 [file Table_2.XLSX]

## Sheet: Sheet1
Sequence Read Archive (SRA) submission: PRJNA801123
Gene_id	readcount_qhb_CK	readcount_NIP_CK	log2FoldChange	pval	padj	Gene name	Gene description
Novel00107	162.445	23.2101	2.8071	1.0163e-20	9.1896e-18	-	-
Novel00118	653.795	1166.76	-0.83559	0.001743	0.048759	-	-
Novel00149	55.7076	19.7157	1.4985	0.00033025	0.014017	-	-
Novel00154	143.527	78.2408	0.87533	0.00045681	0.017958	-	-
Novel00175	271.111	140.314	0.95022	1.4725e-06	0.00018007	-	-
Novel00206	574.834	0	Inf	1.2128e-20	1.0643e-17	-	-
Novel00262	47.0979	1.39275	5.0797	3.4102e-13	1.5654e-10	-	-
Novel00266	87.9695	0	Inf	4.6495e-08	8.5111e-06	-	-
Novel00288	281.525	660.832	-1.231	3.0389e-15	1.8747e-12	-	-
Novel00293	1420.04	728.848	0.96224	1.0077e-09	2.4644e-07	-	-
Novel00295	204.776	426.816	-1.0596	0.0010815	0.034328	-	-
Novel00343	89.7483	24.6161	1.8663	0.00017615	0.0086305	-	-
Novel00358	13.3336	0	Inf	2.9394e-05	0.0021392	-	-
Novel00411	29.6155	0	Inf	6.936e-11	2.1558e-08	-	-
Novel00414	22.8646	2.73176	3.0652	9.951e-05	0.0055603	-	-
Novel00434	51.9357	15.1646	1.776	8.6518e-05	0.0049822	-	-
Novel00448	50.1582	0	Inf	9.792e-14	5.1259e-11	-	-
Novel00493	164.644	261.394	-0.66687	0.00052636	0.020033	-	-
Novel00534	18.7479	0	Inf	4.1504e-07	6.041e-05	-	-
Novel00535	46.8011	5.61455	3.0593	1.6943e-07	2.7326e-05	-	-
Novel00667	30.2233	1.29029	4.5499	0.0014671	0.043129	-	-
Novel00674	35.8392	4.93958	2.8591	3.5896e-06	0.0003719	-	-
Novel00679	17.4931	1.40368	3.6395	0.00046772	0.018291	-	-
Novel00726	23.0273	1.3208	4.1239	0.0014313	0.042284	-	-
Novel00780	30.9363	1.32445	4.5458	1.7892e-06	0.00020936	-	-
Novel00821	232.164	575.537	-1.3098	0.00022349	0.010387	-	-
Novel00834	12.1419	47.1848	-1.9583	3.8964e-05	0.0026605	-	-
Novel00852	102.257	0	Inf	1.5302e-34	2.5366e-31	-	-
Novel00900	17.0433	0	Inf	1.5741e-06	0.00018815	-	-
Novel00914	96.0023	170.613	-0.82959	0.00035916	0.014884	-	-
Novel00922	158.119	11.551	3.7749	5.8522e-29	8.731e-26	-	-
Novel01003	276.716	48.1337	2.5233	2.872e-27	3.7259e-24	-	-
Novel01047	779.79	567.372	0.45879	0.00094909	0.03116	-	-
Novel01084	177.045	0	Inf	1.2112e-56	4.5173e-53	-	-
Novel01127	1739.87	365.808	2.2498	1.1745e-50	3.5045e-47	-	-
Novel01151	156.568	83.8211	0.90141	0.0016004	0.046094	-	-
Novel01197	100.463	52.5799	0.93408	0.0016083	0.046188	-	-
Novel01200	49.5343	164.112	-1.7282	2.4705e-06	0.00027506	-	-
Novel01223	112.36	0	Inf	1.4755e-37	2.5897e-34	-	-
Novel01243	402.268	0	Inf	9.0847e-28	1.2321e-24	-	-
Novel01286	18.9988	0	Inf	0.00055862	0.020887	-	-
Novel01287	21.6268	0	Inf	1.7097e-05	0.0013788	-	-
Novel01306	68.4245	5.70972	3.583	1.8259e-13	9.0803e-11	-	-
Novel01315	491.536	756.832	-0.62268	2.7078e-05	0.0020166	-	-
Novel01333	186.358	43.4431	2.1009	6.5291e-12	2.3758e-09	-	-
Novel01353	136.648	0.313124	8.7695	2.7137e-43	5.3981e-40	-	-
Novel01357	62.1301	122.048	-0.97408	0.00030876	0.013405	-	-
Novel01364	237.224	131.772	0.84821	0.00071309	0.02501	-	-
Novel01367	109.715	42.5284	1.3673	8.216e-06	0.00073619	-	-
Novel01373	310.927	8.46698	5.1986	9.0384e-68	5.3938e-64	-	-
Novel01432	180.206	65.8229	1.453	3.703e-09	8.6321e-07	-	-
Novel01433	106.029	45.988	1.2051	0.0016478	0.046914	-	-
Novel01471	80.9897	161.894	-0.99924	4.0401e-05	0.002709	-	-
Novel01482	41.0047	0.350919	6.8685	4.72e-06	0.00047741	-	-
Novel01493	338.061	553.561	-0.71146	0.00028792	0.012652	-	-
Novel01518	8.16718	42.5095	-2.3799	6.327e-06	0.00060122	-	-
Novel01531	33.096	91.1044	-1.4609	6.9317e-06	0.0006504	-	-
Novel01555	291.993	151.181	0.94966	1.0288e-06	0.00013272	-	-
Os01g0110200	63.5899	21.3423	1.5751	0.00038383	0.015635	ARABINOGALACTAN PROTEIN 12	Conserved hypothetical protein. (Os01t0110200-01)
Os01g0111200	2451.62	3307.83	-0.43215	0.00017037	0.0084869		Like-Sm ribonucleoprotein (LSM)-related domain domain containing protein. (Os01t0111200-01)
Os01g0111700	35.9392	4.33518	3.0514	2.2e-06	0.00024865		Conserved hypothetical protein. (Os01t0111700-01)
Os01g0111900	711.571	348.613	1.0294	4.376e-07	6.3078e-05	SKIP interacting protein 34, SKIPa-interacting protein 34, SKIPa-interacting protein 34	Glutelin family protein. (Os01t0111900-01)
Os01g0112600	86.8719	38.9125	1.1587	0.00036027	0.014909		Conserved hypothetical protein. (Os01t0112600-01)
Os01g0121200	104.265	51.7523	1.0106	0.00068327	0.024504		Zinc finger, RING/FYVE/PHD-type domain containing protein. (Os01t0121200-01)
Os01g0125600	1335.04	883.132	0.59618	3.0938e-06	0.00032772		Heavy metal transport/detoxification protein domain containing protein. (Os01t0125600-01)
Os01g0130400	218.686	402.634	-0.8806	3.3009e-07	4.9995e-05		Similar to Alpha-xylosidase precursor (Fragment). (Os01t0130400-01)
Os01g0135700	49.3622	181.719	-1.8802	2.4086e-13	1.1474e-10	CALMODULIN-LIKE PROTEIN 16	EF-HAND 2 domain containing protein. (Os01t0135700-01)
Os01g0139200	1465.26	2046.38	-0.48192	0.000693	0.024706		Octicosapeptide/Phox/Bem1p domain containing protein.
Os01g0145600	209.141	125.201	0.74023	0.00047523	0.018513		Conserved hypothetical protein. (Os01t0145600-01)
Os01g0155000	446.068	164.111	1.4426	2.0466e-06	0.00023308	Hsr203j	Alpha/beta hydrolase fold-3 domain containing protein. (Os01t0155000-02)
Os01g0155300	170.779	42.1106	2.0199	8.5595e-14	4.5607e-11		Similar to dirigent-like protein. (Os01t0155300-00)
Os01g0168800	362.269	219.19	0.72488	6.2623e-05	0.0038767		Alpha/beta hydrolase fold-1 domain containing protein. (Os01t0168800-01)
Os01g0169000	14.5196	53.3209	-1.8767	2.7102e-05	0.0020166		Hypothetical protein. (Os01t0169000-00)
Os01g0169400	107.467	53.0471	1.0186	0.00037587	0.015459	RAMOSA 2	Similar to LOB domain protein 25. (Os01t0169400-01)
Os01g0170300	4511.2	5810.4	-0.36513	0.0012067	0.036892		Serine/threonine protein kinase-related domain containing protein. (Os01t0170300-01)
Os01g0178500	525.52	370.302	0.50504	0.0011019	0.03482	IAA1	Similar to Auxin-responsive protein (Aux/IAA) (Fragment). (Os01t0178500-02)
Os01g0185500	104.791	196.774	-0.90903	4.0124e-05	0.0027086		Protein of unknown function DUF1637 domain containing protein. (Os01t0185500-00)
Os01g0190300	168.139	80.3032	1.0661	0.00017542	0.0086087	IAA2	Similar to Auxin-responsive protein IAA26 (Indoleacetic acid-induced protein 26) (Phytochrome-associated protein 1). (Os01t0190300-01)
Os01g0190500	581.373	801.621	-0.46346	0.00092238	0.030648		IQ calmodulin-binding region domain containing protein. (Os01t0190500-01)
Os01g0192900	24.1558	67.3763	-1.4799	0.00010333	0.0057196	ACC SYNTHASE 5	1-aminocyclopropane-1-carboxylate synthase family protein. (Os01t0192900-00)
Os01g0205800	111.75	193.804	-0.79432	0.00070644	0.024975	-	-
Os01g0209400	733.675	513.801	0.51393	0.00031762	0.013597		Nucleotide-binding, alpha-beta plait domain containing protein. (Os01t0209400-01)
Os01g0211600	517.114	915.048	-0.82337	0.00085111	0.028859		Cytochrome P450 family protein. (Os01t0211600-01)
Os01g0212400	4624.1	6930.51	-0.58379	0.00062667	0.022887	EF-hand containing H+/cation exchanger 1, EF-hand containing CAX 1, Na+/Ca2+ Exchanger 1, Sodium/Calcium exchanger 1, Na+/Ca2+ exchanger-like protein 1	EF-Hand type domain containing protein. (Os01t0212400-01)
Os01g0214200	777.086	1188.11	-0.61252	0.00094066	0.031018	GDSL ESTERASE/LIPASE PROTEIN 1	Esterase, SGNH hydrolase-type, subgroup domain containing protein. (Os01t0214200-01)
Os01g0214600	16.31	1.28665	3.6641	0.00038123	0.015599	GDSL ESTERASE/LIPASE PROTEIN 2	Lipase, GDSL domain containing protein. (Os01t0214600-01)
Os01g0217500	323.404	149.372	1.1144	6.0393e-09	1.3058e-06	DJ-1/PfpI domain containing protein A, DJ-1 protein A	ThiJ/PfpI domain containing protein. (Os01t0217500-01)
Os01g0220400	155.4	83.1858	0.90158	0.00027769	0.012275		Hypothetical protein. (Os01t0220400-01)
Os01g0231600	23.2535	3.55775	2.7084	0.00038925	0.015744		Pleckstrin homology-type domain containing protein. (Os01t0231600-00)
Os01g0233000	62.5357	203.698	-1.7037	1.3522e-06	0.00016812	developmentally regulated plasma membrane polypeptide 1	DREPP plasma membrane polypeptide family protein. (Os01t0233000-01)
Os01g0235350	99.2237	180.151	-0.86045	0.00016484	0.0082386		Conserved hypothetical protein. (Os01t0235350-00)
Os01g0241000	73.4053	129.28	-0.81654	0.0016196	0.046467		Conserved hypothetical protein. (Os01t0241000-01)
Os01g0243450	31.3386	73.5763	-1.2313	0.00042713	0.01697	-	-
Os01g0257300	131.515	11.8212	3.4758	5.6984e-14	3.1487e-11	ROOT ARCHITECTURE ASSOCIATED 1	Similar to FPF1. (Os01t0257300-01)
Os01g0260800	2059.59	1347.67	0.61189	6.4163e-05	0.0039474		Conserved hypothetical protein. (Os01t0260800-01)
Os01g0263000	1136.84	533.694	1.0909	4.212e-12	1.6757e-09	class III peroxidase 5	Similar to Peroxidase. (Os01t0263000-00)
Os01g0264900	615.984	417.271	0.56191	0.0012635	0.038273	-	-
Os01g0267300	74.0842	9.15061	3.0172	5.1377e-07	7.1971e-05	serpin-Z12	Hypothetical conserved gene. (Os01t0267300-00)
Os01g0270300	208.955	353.021	-0.75656	4.1911e-05	0.0027914	class III peroxidase 4	Similar to Cationic peroxidase isozyme 40K precursor. (Os01t0270300-01)
Os01g0272600	33.7809	9.44552	1.8385	0.00086341	0.02911		Similar to Root determined nodulation 1. (Os01t0272600-01)
Os01g0273800	80.8342	165.608	-1.0347	1.8337e-05	0.001457	YUCCA-LIKE GENE 9	FAD-dependent pyridine nucleotide-disulphide oxidoreductase domain containing protein. (Os01t0273800-01)
Os01g0274500	3202.11	4335.98	-0.43734	0.00013059	0.0069333	ALPHA-EXPANSIN 11	Similar to Expansin-A11. (Os01t0274500-00)
Os01g0275300	377.648	256.97	0.55544	0.0012554	0.038086		Conserved hypothetical protein. (Os01t0275300-01)
Os01g0281301	32.2573	5.74023	2.4904	0.00010351	0.0057196		Protein of unknown function DUF1645 domain containing protein. (Os01t0281301-00)
Os01g0290800	298.477	492.34	-0.72204	7.5463e-05	0.0044854		Hypothetical protein. (Os01t0290800-01)
Os01g0294700	7752.35	10651.6	-0.45836	8.9007e-05	0.0050683	peroxidase, class III peroxidase 11	Haem peroxidase, plant/fungal/bacterial family protein. (Os01t0294700-01)
Os01g0309100	957.528	1277.58	-0.41602	0.0011396	0.03542		Similar to anther-specific protein SF18. (Os01t0309100-01)
Os01g0314800	562.888	278.624	1.0145	0.00058682	0.021746	LATE EMBRYOGENESIS ABUNDANT PROTEIN 9	Late embryogenesis abundant protein 3 family protein. (Os01t0314800-01)
Os01g0337500	236.818	59.4209	1.9947	3.1225e-08	5.8231e-06		Similar to H+-pyrophosphatase (Fragment). (Os01t0337500-00)
Os01g0362100	395.116	640.196	-0.69624	2.8855e-06	0.00031166		Esterase/lipase/thioesterase domain containing protein. (Os01t0362100-01)
Os01g0375500	453.233	715.155	-0.658	0.00026985	0.012035		Similar to Shikimate biosynthesis protein aroDE. (Os01t0375500-00)
Os01g0507000	428.791	299.562	0.51742	0.0016247	0.046565	MICRORNA159A	Non-protein coding transcript. (Os01t0507000-01);Conserved hypothetical protein. (Os01t0507000-02)
Os01g0510200	588.461	207.869	1.5013	0.00016315	0.0081816		Conserved hypothetical protein. (Os01t0510200-01)
Os01g0511200	2429.16	3174.82	-0.38622	0.00081778	0.027951		Conserved hypothetical protein. (Os01t0511200-01)
Os01g0513900	910.419	1343.12	-0.56098	0.00036702	0.015147	KIN7A	Similar to Kinesin heavy chain (Fragment). (Os01t0513900-01)
Os01g0518300	47.3137	13.4515	1.8145	0.00014092	0.007364		Conserved hypothetical protein. (Os01t0518300-00)
Os01g0525350	125.987	63.3536	0.99177	0.00023112	0.010659		Similar to RTFL15 (ROTUNDIFOLIA LIKE 15). (Os01t0525350-00)
Os01g0528800	936.8	1324.62	-0.49976	8.8462e-05	0.0050652	cinnamyl alcohol dehydrogenase-like	Similar to Cinnamyl alcohol dehydrogenase. (Os01t0528800-01)
Os01g0537250	107.187	12.0747	3.1501	8.8798e-17	6.4623e-14		Protein of unknown function DUF3778 domain containing protein. (Os01t0537250-01)
Os01g0541800	164.633	262.079	-0.67075	0.00048893	0.018848	SWEET2A	MtN3 and saliva related transmembrane protein family protein. (Os01t0541800-01)
Os01g0543100	2342.8	1273.95	0.87892	9.0456e-09	1.9007e-06	class III peroxidase 17	Similar to Peroxidase 72 precursor (EC 1.11.1.7) (Atperox P72) (PRXR8) (ATP6a). (Os01t0543100-01)
Os01g0550300	887.235	443.28	1.0011	7.0076e-10	1.8504e-07		Similar to Gda-1 protein. (Os01t0550300-01);Similar to N-rich protein. (Os01t0550300-02)
Os01g0559600	212.789	100.083	1.0882	7.2329e-06	0.00067232	vacuolar processing enzyme 2, legumain 1	Similar to C13 endopeptidase NP1 precursor. (Os01t0559600-01);Similar to Asparaginyl endopeptidase. (Os01t0559600-02)
Os01g0572300	282.422	509.24	-0.85049	3.5267e-06	0.00036709	indeterminate domain 11	Zinc finger, C2H2-type domain containing protein. (Os01t0572300-01)
Os01g0585100	626.602	401.107	0.64356	1.3127e-05	0.0011096		Similar to Integral membrane protein. (Os01t0585100-01)
Os01g0588100	17.5913	2.29433	2.9387	0.0011156	0.035088		Similar to Hypersensitive-induced response protein. (Os01t0588100-00)
Os01g0594300	1336.05	2416.59	-0.855	1.5809e-12	7.0403e-10		Similar to leucine-rich repeat family protein / extensin family protein. (Os01t0594300-01);Pistil-specific extensin-like protein family protein. (Os01t0594300-02)
Os01g0603300	113.705	252.97	-1.1537	0.0001722	0.0085352		Similar to MCB2 protein. (Os01t0603300-01);Similar to MCB2 protein. (Os01t0603300-02)
Os01g0607200	94.4994	174.78	-0.88716	0.00013542	0.0071748	bi-directional amino acid transporter 1	Amino acid permease subfamily protein. (Os01t0607200-01);Similar to amino acid permease family protein. (Os01t0607200-02)
Os01g0611000	5408.44	9036.08	-0.74049	2.6121e-11	8.7573e-09		Protein of unknown function DUF642 domain containing protein. (Os01t0611000-01);Hypothetical conserved gene. (Os01t0611000-02)
Os01g0612600	1565.12	2713.41	-0.79384	2.7214e-11	9.0224e-09		Protein of unknown function DUF1644 family protein. (Os01t0612600-01)
Os01g0616366	310.724	491.491	-0.66153	0.0010161	0.032814		Hypothetical protein. (Os01t0616366-00)
Os01g0623900	326.098	163.11	0.99946	1.5612e-06	0.00018815		Conserved hypothetical protein. (Os01t0623900-01)
Os01g0627800	39.1915	10.855	1.8522	0.0010512	0.033581		Similar to Cytochrome P450 monooxygenase CYP72A5 (Fragment). (Os01t0627800-01)
Os01g0634300	485.676	724.336	-0.57667	0.0015454	0.044857	DnaJ domain protein C11	Conserved hypothetical protein. (Os01t0634300-00)
Os01g0642000	67.5447	149.253	-1.1438	7.3121e-06	0.00067757	IMCEL2	Carboxylesterase, type B family protein. (Os01t0642000-01)
Os01g0642600	60.5939	23.9135	1.3413	0.0017229	0.048498		Protein of unknown function DUF617, plant family protein. (Os01t0642600-00)
Os01g0646300	206.579	314.028	-0.6042	0.0008707	0.029323	SLENDER RICE LIKE 1	Similar to RGA2 protein. (Os01t0646300-01)
Os01g0651932	44.1915	126.183	-1.5137	0.00040839	0.016356		Hypothetical conserved gene. (Os01t0651932-00)
Os01g0655300	369.021	197.884	0.89904	0.00038215	0.015599	SET protein 2	Similar to Trithorax 4 (Fragment). (Os01t0655300-01)
Os01g0668400	33.5156	76.4122	-1.189	0.00054341	0.020447		Similar to predicted protein. (Os01t0668400-00)
Os01g0679500	225.489	487.662	-1.1128	1.3252e-10	3.9542e-08		Peptidase aspartic, catalytic domain containing protein. (Os01t0679500-01)
Os01g0686800	21637.4	28235.5	-0.38399	0.00040982	0.016392	RECEPTOR FOR ACTIVATED C-KINASE 1	Protein containing the WD-40 repeat, Innate immunuty (Os01t0686800-01);Similar to Guanine nucleotide-binding protein subunit beta-like protein A. (Os01t0686800-02)
Os01g0687400	409.022	214.562	0.93079	2.0306e-05	0.0015945		Similar to Chitinase (EC 3.2.1.14). (Os01t0687400-01)
Os01g0695100	237.195	773.84	-1.706	1.6048e-20	1.3681e-17	Phosphoethanolamine N-Methyltransferase 1	Similar to Phosphoethanolamine N-methyltransferase. (Os01t0695100-01)
Os01g0695700	47.6891	8.99579	2.4063	1.9239e-06	0.0002225	MULTIDRUG RESISTANCE 9	Similar to MDR-like ABC transporter. (Os01t0695700-00)
Os01g0700000	2337.44	3741.32	-0.67862	1.761e-08	3.4798e-06		Conserved hypothetical protein. (Os01t0700000-01);Conserved hypothetical protein. (Os01t0700000-02)
Os01g0700100	1.31831	16.1702	-3.6166	0.00035642	0.014832	SWEET2B	MtN3 and saliva related transmembrane protein family protein. (Os01t0700100-01)
Os01g0703400	704.855	953.131	-0.43535	0.0010466	0.03347	farnesyl diphosphate synthase 1, farnesyl diphosphate synthase, FDP synthase	Similar to Farnesyl pyrophosphate synthetase (FPP synthetase) (FPS) (Farnesyl diphosphate synthetase) [Includes: Dimethylallyltranstransferase (EC 2.5.1.1); Geranyltranstransferase (EC 2.5.1.10)]. (Os01t0703400-01)
Os01g0706850	76.2498	161.741	-1.0849	8.9509e-06	0.00079017	-	-
Os01g0708400	466.96	302.327	0.62719	0.00081533	0.027917	-	-
Os01g0711400	2347.55	3303.53	-0.49285	2.3126e-05	0.0017876		Similar to Victorin binding protein. (Os01t0711400-01)
Os01g0717000	106.215	38.3588	1.4694	0.0017485	0.048759		Similar to GmCK1p (EC 2.7.1.32). (Os01t0717000-01);Similar to Choline kinase. (Os01t0717000-02);Similar to Choline kinase. (Os01t0717000-05)
Os01g0720400	508.548	730.68	-0.52286	0.00022348	0.010387	acid phosphatase 1	HAD-superfamily subfamily IB hydrolase, hypothetical 1 protein. (Os01t0720400-01)
Os01g0720500	197.94	429.813	-1.1186	9.1191e-11	2.7484e-08		Similar to Type I chlorophyll a/b-binding protein b (Fragment). (Os01t0720500-01);Non-protein coding transcript. (Os01t0720500-02)
Os01g0723800	224.025	106.553	1.0721	1.1791e-06	0.00014844	MULTIDRUG RESISTANCE 17	Similar to P-glycoprotein homologue. (Os01t0723800-01);Hypothetical conserved gene. (Os01t0723800-02)
Os01g0724700	13.8244	60.4515	-2.1286	0.00090946	0.030377		Similar to lachrymatory-factor synthase. (Os01t0724700-00)
Os01g0725800	647.41	901.163	-0.47711	0.00048674	0.018812	SPA3/4-like	WD40/YVTN repeat-like domain containing protein. (Os01t0725800-01)
Os01g0727820	49.5032	183.957	-1.8938	1.1743e-13	6.041e-11		Hypothetical protein. (Os01t0727820-00)
Os01g0730300	708.623	985.969	-0.47652	0.00031473	0.013534	TREHALOSE-6-PHOSPHATE SYNTHASE 3	Similar to predicted protein. (Os01t0730300-01);HAD-superfamily hydrolase subfamily IIB protein. (Os01t0730300-02);Similar to predicted protein. (Os01t0730300-03)
Os01g0732700	118.54	54.227	1.1283	6.5874e-05	0.0040176	YUCCA-LIKE GENE 3	Flavin monooxygenase-like enzyme , Auxin biosynthesis (Os01t0732700-01);Flavin monooxygenase-like enzyme , Auxin biosynthesis (Os01t0732700-02)
Os01g0734466	124.161	50.6633	1.2932	4.286e-06	0.00043947	Respiratory Burst Oxidase Homolog A	Similar to NAD(P)H oxidase (Fragment). (Os01t0734466-01)
Os01g0749400	488.186	710.823	-0.54206	0.0001533	0.0077925	TREHALOSE-6-PHOSPHATE SYNTHASE 2	HAD-superfamily hydrolase subfamily IIB protein. (Os01t0749400-02)
Os01g0754800	62.477	17.0397	1.8744	7.8326e-06	0.00071253		Hypothetical protein. (Os01t0754800-01)
Os01g0758200	419.116	265.707	0.65751	8.3493e-05	0.0048468	DNA BINDING WITH ONE FINGER 6	Similar to Dof2 (Fragment). (Os01t0758200-01)
Os01g0769700	937.403	1392.57	-0.57101	4.0342e-05	0.002709	DWARF AND RUNTISH SPIKELET2	Receptor-like kinase, Control of reproductive growth and development, Repression of cell death (Os01t0769700-01);Similar to predicted protein. (Os01t0769700-02)
Os01g0775100	270.528	479.321	-0.82521	3.7257e-05	0.0025674		Plus-3 domain containing protein. (Os01t0775100-01)
Os01g0777200	552.097	358.037	0.62481	6.8924e-05	0.0041631		Peptidase aspartic, catalytic domain containing protein. (Os01t0777200-01)
Os01g0783500	751.787	553.592	0.4415	0.0017782	0.049356		Rossmann-like alpha/beta/alpha sandwich fold domain containing protein. (Os01t0783500-01)
Os01g0783700	21.8514	2.92786	2.8998	0.00088446	0.029586		Similar to EF-hand Ca2+-binding protein CCD1. (Os01t0783700-01)
Os01g0788500	166.441	309.428	-0.8946	1.9093e-05	0.0015111		Disease resistance protein domain containing protein. (Os01t0788500-01)
Os01g0803300	236.153	39.2276	2.5898	1.3415e-06	0.00016748		Protein of unknown function DUF6, transmembrane domain containing protein. (Os01t0803300-01)
Os01g0814900	2932.83	3946.4	-0.42824	0.00027299	0.012139	cytochrome b5 reductase	Similar to Cytochrome b5 reductase. (Os01t0814900-01)
Os01g0818000	683.265	953.309	-0.4805	0.0010286	0.033078	PIN likes 6a	Auxin efflux carrier domain containing protein. (Os01t0818000-01);Auxin efflux carrier domain containing protein. (Os01t0818000-02)
Os01g0819466	1256.48	2126.14	-0.75885	3.2118e-07	4.8894e-05	-	-
Os01g0824800	90.3843	15.4706	2.5465	1.4511e-05	0.0012027		Conserved hypothetical protein. (Os01t0824800-01)
Os01g0826400	142.967	59.7698	1.2582	5.0021e-06	0.00049917	WRKY GENE 24	WRKY transcription factor 24 (WRKY24). (Os01t0826400-01)
Os01g0829100	46.004	114.41	-1.3144	5.8528e-06	0.00056779		Ankyrin domain containing protein. (Os01t0829100-01)
Os01g0830300	305.726	196.996	0.63407	0.00058704	0.021746	-	-
Os01g0840100	839.633	1569.6	-0.90256	0.0001811	0.0087905	heat-shock protein 70, heat-shock protein cognate 70, Mediator 37_1	Heat shock protein Hsp70 family protein. (Os01t0840100-01)
Os01g0842500	119.212	49.8809	1.257	0.00014697	0.0075872	LACCASE 5	Similar to Laccase (EC 1.10.3.2). (Os01t0842500-01)
Os01g0857400	53.8534	101.399	-0.91293	0.0017466	0.048759	gamma-aminobutyric acid transporter 3	Amino acid transporter, transmembrane domain containing protein. (Os01t0857400-01)
Os01g0860900	459.307	709.929	-0.62821	1.7408e-05	0.0014001		Conserved hypothetical protein. (Os01t0860900-01)
Os01g0866600	1538.64	1110.69	0.4702	0.0013321	0.039788		Similar to bolA-like protein. (Os01t0866600-01)
Os01g0874700	2949.92	4127.34	-0.48454	2.4878e-05	0.0018936		GOLD domain containing protein. (Os01t0874700-01);GOLD domain containing protein. (Os01t0874700-02);Similar to patellin-1. (Os01t0874700-03)
Os01g0875700	305.252	442.964	-0.53719	0.0011518	0.035641	DnaJ domain protein B2	Heat shock protein DnaJ family protein. (Os01t0875700-01)
Os01g0876400	373.26	643.981	-0.78684	1.6124e-07	2.629e-05		Sad1/UNC-like, C-terminal domain containing protein. (Os01t0876400-01);Hypothetical conserved gene. (Os01t0876400-02);Hypothetical conserved gene. (Os01t0876400-03);Hypothetical conserved gene. (Os01t0876400-04)
Os01g0880200	46.2385	109.946	-1.2496	4.1177e-05	0.0027486		Glycosyl transferase, family 8 protein. (Os01t0880200-01);Similar to secondary cell wall-related glycosyltransferase family 8. (Os01t0880200-02);Similar to cDNA clone:J013112C08, full insert sequence. (Os01t0880200-03);Similar to cDNA clone:J013112C08, full insert sequence. (Os01t0880200-04)
Os01g0881900	175.939	52.4034	1.7473	0.00072168	0.025245		Leucine-rich repeat, cysteine-containing containing protein. (Os01t0881900-01)
Os01g0896200	244.44	151.259	0.69246	0.0005948	0.021965		Similar to SF16 protein. (Os01t0896200-01)
Os01g0902100	398.404	606.514	-0.60631	0.00031137	0.013465	MULTIDRUG RESISTANCE-ASSOCIATED PROTEIN 2	Similar to MRP-like ABC transporter. (Os01t0902100-00)
Os01g0914000	484.211	265.515	0.86684	9.5813e-08	1.6525e-05		Conserved hypothetical protein. (Os01t0914000-01)
Os01g0923200	191.283	100.326	0.93102	3.1974e-05	0.0022989		Similar to AT.I.24-6 protein (Fragment). (Os01t0923200-01)
Os01g0929200	70.4885	140.881	-0.99902	0.00012371	0.0066009	RECEPTOR-LIKE CYTOPLASMIC KINASE 53	Serine/threonine protein kinase domain containing protein. (Os01t0929200-01)
Os01g0930500	120.083	22.2635	2.4313	6.8885e-06	0.00064839		Conserved hypothetical protein. (Os01t0930500-01)
Os01g0930950	3.25586	30.8991	-3.2465	2.8933e-06	0.00031166		NAD(P)-binding domain domain containing protein. (Os01t0930950-00)
Os01g0931000	40.8064	164.796	-2.0138	1.8976e-13	9.2819e-11		Similar to tropinone reductase 2. (Os01t0931000-00)
Os01g0933200	445.552	259.757	0.77843	9.6166e-05	0.0054038		Heavy metal transport/detoxification protein domain containing protein. (Os01t0933200-00)
Os01g0935800	165.888	391.624	-1.2393	7.745e-12	2.7188e-09	RECEPTOR-LIKE CYTOPLASMIC KINASE 54	Similar to BRASSINOSTEROID INSENSITIVE 1-associated receptor kinase 1. (Os01t0935800-01)
Os01g0937100	646.826	899.387	-0.47557	0.0011239	0.035162		Similar to Xylanase inhibitor precursor (Xylanase inhibitor TAXI-I). (Os01t0937100-01)
Os01g0937900	576.543	910.609	-0.6594	0.00018271	0.0088503	ARABINOGALACTAN PROTEIN 2	Conserved hypothetical protein. (Os01t0937900-00)
Os01g0938600	781.414	1076.29	-0.46191	0.00050135	0.019252		Conserved hypothetical protein. (Os01t0938600-01)
Os01g0949300	1001.6	408.699	1.2932	7.1736e-06	0.00067099		EF-Hand type domain containing protein. (Os01t0949300-01)
Os01g0949500	183.35	309.702	-0.75628	3.4901e-05	0.0024503	CALMODULIN-LIKE PROTEIN 10	Similar to Calmodulin (CaM). (Os01t0949500-01)
Os01g0951200	1873.59	2578.17	-0.46054	0.00040749	0.016343	UMP synthase 1	Similar to Orotidine 5'-phosphate decarboxylase (EC 4.1.1.23) (OMP decarboxylase) (OMPDCase) (OMPdecase) (Uridine 5'-monophosphate synthase) (UMP synthase). (Os01t0951200-01)
Os01g0959000	1612.36	2316.07	-0.52251	0.00020455	0.0097031		Nucleotide-binding, alpha-beta plait domain containing protein. (Os01t0959000-01)
Os01g0971100	290.267	193.831	0.58258	0.0017696	0.049209	drought-induced 19-5	Drought induced 19 family protein. (Os01t0971100-01)
Os01g0974600	14.0804	0	Inf	1.6744e-05	0.0013539		Similar to Histone H2A. (Os01t0974600-00)
Os01g0974800	1020.93	750.688	0.4436	0.00080468	0.027661		Similar to AtPPa4 (Arabidopsis thaliana pyrophosphorylase 4); inorganic diphosphatase. (Os01t0974800-01)
Os02g0100600	24.5484	4.31697	2.5075	0.00046482	0.018201		Harpin-induced 1 domain containing protein. (Os02t0100600-01)
Os02g0102300	9.40701	0	Inf	0.00069265	0.024706	SULFURTRANSFERASE 5	Arsenate reductase, Sulfurtransferase/rhodanese-like protein, Regulation of arsenic accumulation (Os02t0102300-01)
Os02g0112000	34.1114	139.782	-2.0349	7.0478e-05	0.0042397		Hypothetical protein. (Os02t0112000-00)
Os02g0114900	15.7776	51.3934	-1.7037	0.00013836	0.0072681	-	-
Os02g0124800	354.327	239.08	0.56759	0.0011179	0.035112		Conserved hypothetical protein. (Os02t0124800-01)
Os02g0126300	13.709	0.350919	5.2878	0.00012022	0.0064751		MAP65/ASE1 family protein. (Os02t0126300-01)
Os02g0131100	132.974	343.511	-1.3692	7.7627e-06	0.0007105		Hypothetical conserved gene. (Os02t0131100-01);Conserved hypothetical protein. (Os02t0131100-02)
Os02g0135500	1410.09	2067.77	-0.55229	4.8221e-06	0.00048282		Similar to glycosyltransferase. (Os02t0135500-01);Glycosyltransferase AER61, uncharacterized domain containing protein. (Os02t0135500-02)
Os02g0137700	4.9077	24.6225	-2.3269	0.00069646	0.024779		NAD(P)-binding domain containing protein. (Os02t0137700-01)
Os02g0138000	3770.56	5211.16	-0.46683	3.4758e-05	0.002446		Leucine-rich repeat, plant specific containing protein. (Os02t0138000-00)
Os02g0139200	1492.97	2042.99	-0.45249	0.00018863	0.0090778	PROTEIN ARGININE METHYLTRANSFERASE 5	Skb1 methyltransferase family protein. (Os02t0139200-01)
Os02g0139400	1681.08	2263.79	-0.42935	0.00091016	0.030377	RICE SQUAMOSA PROMOTER-BINDING-LIKE 3	Similar to Squamosa promoter-binding-like protein 3. (Os02t0139400-01)
Os02g0161200	248.943	382.856	-0.62099	0.00039206	0.0158	ZINC FINGER CCCH DOMAIN-CONTAINING PROTEIN 13	Zinc finger, CCCH-type domain containing protein. (Os02t0161200-01)
Os02g0163500	151.133	78.7828	0.93986	0.00013818	0.0072681		Conserved hypothetical protein. (Os02t0163500-01)
Os02g0168400	182.286	332.795	-0.86843	0.00024642	0.011184		Hypothetical conserved gene. (Os02t0168400-01)
Os02g0170701	30.4007	92.7964	-1.61	1.1054e-06	0.00013976		Conserved hypothetical protein. (Os02t0170701-00)
Os02g0176000	66.2161	119.525	-0.85206	0.0015714	0.045434	B-box-containing protein 2	Zinc finger, B-box domain containing protein. (Os02t0176000-00)
Os02g0178100	198.438	480.996	-1.2773	8.1789e-10	2.0684e-07	B-box-containing protein 3, CCT domain-containing gene 5, CCT (CO, CO-LIKE and TOC1) domain protein 5, CCT domain protein 5	Similar to CONSTANS-like protein CO6. (Os02t0178100-01)
Os02g0178700	127.894	276.332	-1.1115	6.3678e-07	8.5974e-05	basic helix-loop-helix protein 157	Helix-loop-helix DNA-binding domain containing protein. (Os02t0178700-01)
Os02g0180700	403.114	583.644	-0.5339	0.00033455	0.014179	cinnamoyl CoA reductase 21	Similar to Cinnamoyl-CoA reductase (EC 1.2.1.44). (Os02t0180700-01)
Os02g0181300	152.256	65.7011	1.2125	0.00045558	0.017934	WRKY GENE 71	WRKY transcription factor, Defense response (Os02t0181300-01)
Os02g0185200	16.4389	87.3088	-2.409	2.1434e-07	3.366e-05		Cytochrome P450 family protein. (Os02t0185200-01)
Os02g0187700	582.649	359.287	0.69749	4.7441e-06	0.00047822		Similar to Myb-related protein B (B-Myb) (Myb-related protein 1) (XMYB1). (Os02t0187700-00)
Os02g0198400	732.448	1024.15	-0.48362	0.0013668	0.04062		Similar to predicted protein. (Os02t0198400-00)
Os02g0198500	103.183	49.3708	1.0635	0.00031819	0.013602		Conserved hypothetical protein. (Os02t0198500-01);Hypothetical conserved gene. (Os02t0198500-02)
Os02g0204400	87.9968	148.474	-0.75468	0.0017615	0.04906	UVR3	Similar to (6-4)DNA photolyase. (Os02t0204400-00)
Os02g0208100	189.891	100.086	0.92393	0.00045876	0.018011	PLASTIDIC NUCLEOTIDE TRANSPORT PROTEIN 2	Similar to plastidic ATP/ADP-transporter. (Os02t0208100-01)
Os02g0215200	22.0306	3.96605	2.4737	0.00099562	0.032326	CLASS-1 TYPE HISTONE DEACETYLASE 2	Class-I type histone deacetylase, Vegetative growth (Os02t0215200-01);Similar to Histone deacetylase. (Os02t0215200-02);Similar to Histone deacetylase. (Os02t0215200-03)
Os02g0216300	3998.91	2610.17	0.61546	0.00053832	0.020357		Similar to cDNA clone:J023088C01, full insert sequence. (Os02t0216300-01);Similar to cDNA clone:J023088C01, full insert sequence. (Os02t0216300-04);Similar to cDNA clone:J023088C01, full insert sequence. (Os02t0216300-05);Similar to cDNA clone:J023088C01, full insert sequence. (Os02t0216300-07);Similar to cDNA clone:001-032-A03, full insert sequence. (Os02t0216300-09)
Os02g0219200	30.1664	70.6835	-1.2284	0.00053897	0.020357	BETA-GALACTOSIDASE 7	Similar to Beta-galactosidase precursor (EC 3.2.1.23) (Lactase) (Acid beta- galactosidase) (Exo-(1-->4)-beta-D-galactanase). (Os02t0219200-01);Similar to Beta-galactosidase. (Os02t0219200-02);Similar to Beta-galactosidase. (Os02t0219200-03)
Os02g0219900	117.733	29.0733	2.0178	1.4402e-10	4.2547e-08		Similar to Epstein-Barr nuclear antigen-1 (EBNA-1). (Os02t0219900-01);Similar to Epstein-Barr nuclear antigen-1 (EBNA-1). (Os02t0219900-02)
Os02g0247100	428.646	719.537	-0.74728	6.3565e-07	8.5974e-05	b-ZIP TRANSCRIPTION FACTOR 19	Similar to bZIP transcription factor family protein. (Os02t0247100-00)
Os02g0256200	2075.44	1596.95	0.3781	0.0016347	0.046766		Similar to Histidine-rich protein. (Os02t0256200-02)
Os02g0265900	171.298	92.6264	0.88701	0.00031537	0.013534		Reticulon family protein. (Os02t0265900-01);Hypothetical conserved gene. (Os02t0265900-02);Reticulon family protein. (Os02t0265900-03);Similar to Reticulon. (Os02t0265900-04)
Os02g0281200	159.376	82.4523	0.9508	9.8438e-05	0.0055107		Similar to NBS-LRR protein (Fragment). (Os02t0281200-01);Similar to NBS-LRR protein (Fragment). (Os02t0281200-02)
Os02g0285300	176.99	651.445	-1.88	2.7361e-06	0.00029905	developmentally regulated plasma membrane polypeptide 2	DREPP plasma membrane polypeptide family protein. (Os02t0285300-01)
Os02g0297200	252.71	130.826	0.94984	2.5559e-06	0.00028246		Protein of unknown function DUF594 family protein. (Os02t0297200-01)
Os02g0301100	70.9577	20.421	1.7969	0.00025577	0.011528	SWEET4	RAG1-activating protein 1 homologue domain containing protein. (Os02t0301100-01)
Os02g0327700	2366.34	3495.44	-0.56281	9.9761e-07	0.00012999		Glycosyltransferase AER61, uncharacterized domain containing protein. (Os02t0327700-01);Hypothetical conserved gene. (Os02t0327700-03)
Os02g0328550	77.1357	138.761	-0.84713	0.00084144	0.028641		Hypothetical genes. (Os02t0328550-00)
Os02g0331200	793.697	1361.13	-0.77814	2.3566e-09	5.5367e-07		Glycosyltransferase AER61, uncharacterized domain containing protein. (Os02t0331200-01);Similar to glycosyltransferase. (Os02t0331200-02)
Os02g0433900	554.894	341.834	0.69892	6.0588e-06	0.00058174		Conserved hypothetical protein. (Os02t0433900-01)
Os02g0448600	365.268	241.889	0.59461	0.0016062	0.04617		Conserved hypothetical protein. (Os02t0448600-01)
Os02g0466400	101.599	29.4866	1.7848	0.00068147	0.024477	INOSITOL 1,3,4-TRISPHOSPHATE 5/6-KINASE 4	Similar to Inositol phosphate kinase. (Os02t0466400-01)
Os02g0488600	130.971	222.319	-0.76339	0.00064412	0.02341	plant U-box-containing protein 8, U-box protein 8	Armadillo-like helical domain containing protein. (Os02t0488600-01)
Os02g0498700	813.347	1135.74	-0.48169	0.00024355	0.011112		Similar to QUA1 (QUASIMODO 1); polygalacturonate 4-alpha-galacturonosyltransferase/ transferase, transferring glycosyl groups / transferase, transferring hexosyl groups. (Os02t0498700-01);Similar to QUA1 (QUASIMODO 1); polygalacturonate 4-alpha-galacturonosyltransferase/ transferase, transferring glycosyl groups / transferase, transferring hexosyl groups. (Os02t0498700-02)
Os02g0503700	15.826	94.5162	-2.5783	6.2568e-12	2.3048e-09		Similar to Cytochrome P450 CYP81L6. (Os02t0503700-00)
Os02g0505500	75.398	15.5403	2.2785	6.1131e-05	0.003808		Conserved hypothetical protein. (Os02t0505500-01)
Os02g0510600	565.33	788.153	-0.47938	0.0006855	0.024555		Heavy metal transport/detoxification protein domain containing protein. (Os02t0510600-01);Conserved hypothetical protein. (Os02t0510600-02)
Os02g0528500	165.169	76.623	1.1081	5.1963e-05	0.0033343		Nucleic acid-binding, OB-fold domain containing protein. (Os02t0528500-01);Nucleic acid-binding, OB-fold-like domain containing protein. (Os02t0528500-02)
Os02g0531600	50.7184	0.313124	7.3396	1.3656e-08	2.772e-06	RICE TERMINAL FLOWER 1/CENTRORADIALIS HOMOLOG 2	PEBP family protein. (Os02t0531600-01)
Os02g0538700	216.457	50.5766	2.0975	4.2165e-05	0.002802		Harpin-induced 1 domain containing protein. (Os02t0538700-01);Harpin-induced 1 domain containing protein. (Os02t0538700-02)
Os02g0543000	155.097	41.2525	1.9106	2.6346e-06	0.00028901	ABSCISIC ACID-STRESS-RIPENING-INDUCIBLE 1 PROTEIN	Abscisic stress ripening protein 1. (Os02t0543000-01);Hypothetical conserved gene. (Os02t0543000-02);Similar to Abscisic stress ripening protein 1. (Os02t0543000-03);ABA/WDS induced protein family protein. (Os02t0543000-04);Abscisic stress ripening protein 1. (Os02t0543000-05)
Os02g0550000	131.872	70.2023	0.90955	0.00053326	0.020218		Conserved hypothetical protein. (Os02t0550000-01)
Os02g0552700	6.23325	63.996	-3.3599	6.1473e-12	2.2928e-09	CCHC-type zinc finger protein 6	Conserved hypothetical protein. (Os02t0552700-01)
Os02g0556000	39.0102	8.07098	2.273	0.00010295	0.0057098		Similar to cDNA clone:J013112C08, full insert sequence. (Os02t0556000-00)
Os02g0567850	371.303	672.353	-0.85662	0.00039238	0.0158		Hypothetical gene. (Os02t0567850-01)
Os02g0573400	390.521	548.819	-0.49093	0.0012555	0.038086		Peptidase C19, ubiquitin carboxyl-terminal hydrolase 2 family protein. (Os02t0573400-01)
Os02g0574500	40.2841	86.3625	-1.1002	0.00062043	0.022734		General substrate transporter domain containing protein. (Os02t0574500-01);General substrate transporter domain containing protein. (Os02t0574500-02);General substrate transporter domain containing protein. (Os02t0574500-03)
Os02g0579600	911.688	645.09	0.49904	0.00025143	0.01135	MADS BOX GENE 27	Transcription factor MADS27. (Os02t0579600-00)
Os02g0581200	1064.57	514.149	1.05	2.5183e-05	0.001903		Similar to OSIGBa0115M15.3 protein. (Os02t0581200-01)
Os02g0590400	119.084	262.887	-1.1425	0.001116	0.035088		Lecithin:cholesterol acyltransferase family protein. (Os02t0590400-01);Lecithin:cholesterol acyltransferase family protein. (Os02t0590400-02);Lecithin:cholesterol acyltransferase family protein. (Os02t0590400-03)
Os02g0593700	1776.54	954.892	0.89566	5.8795e-05	0.0037247		Similar to TA4 protein (Fragment). (Os02t0593700-01);Similar to Ubiquitin-associated protein. (Os02t0593700-02);Similar to Ubiquitin-associated protein. (Os02t0593700-03);Similar to TA4 protein (Fragment). (Os02t0593700-04)
Os02g0594651	167.115	518.133	-1.6325	1.3976e-21	1.3452e-18		Hypothetical gene. (Os02t0594651-00)
Os02g0597950	611.941	923.28	-0.59338	2.3631e-05	0.0018126	-	-
Os02g0606200	942.148	1647.76	-0.80648	1.0893e-08	2.2571e-06	B-box-containing protein 4	Zinc finger, B-box domain containing protein. (Os02t0606200-01)
Os02g0611800	2009.42	2699.18	-0.42574	0.00027995	0.012342	HYDROXYCINNAMOYLTRANSFERASE 2	Similar to Hydroxyanthranilate hydroxycinnamoyltransferase 3. (Os02t0611800-01)
Os02g0614300	564.475	389.669	0.53466	0.00038787	0.015744	PLETHORA 3	Similar to ANT-like protein. (Os02t0614300-01)
Os02g0621800	999.222	1623.42	-0.70016	2.7601e-05	0.0020487	HYBRID WEAKNESS H1	Glucose-methanol-choline (GMC) oxidoreductase family protein, Hybrid breakdown (HB) (Os02t0621800-01)
Os02g0626400	2586.19	3349.04	-0.37292	0.001038	0.033266	PHENYLALANINE AMMONIA-LYASE	Phenylalanine ammonia-lyase (EC 4.3.1.5). (Os02t0626400-01);Similar to Phenylalanine ammonia-lyase. (Os02t0626400-02);Similar to Phenylalanine ammonia-lyase. (Os02t0626400-03)
Os02g0628800	327.779	139.135	1.2362	1.5815e-10	4.5541e-08		Similar to Ubiquitin-like protein 5 (Fragment). (Os02t0628800-01)
Os02g0629800	1364.66	3379.8	-1.3084	5.1232e-28	7.2793e-25	Cp-thionin 1, defensin-like 7	Similar to Defensin precursor. (Os02t0629800-01)
Os02g0642200	74.6189	142.139	-0.92969	0.00026542	0.011886	REMORIN 1.4	Similar to Remorin. (Os02t0642200-01)
Os02g0653200	3410.52	2343.52	0.54131	5.2752e-06	0.00052293	UCLACYANIN-LIKE PROTEIN 4	Cupredoxin domain containing protein. (Os02t0653200-01)
Os02g0653400	120.756	65.2374	0.88833	0.0010203	0.032911		Similar to OSIGBa0101C23.8 protein. (Os02t0653400-01)
Os02g0658000	128.33	52.0162	1.3028	2.6026e-06	0.00028656		Pleckstrin-like domain containing protein. (Os02t0658000-01)
Os02g0658200	61.4136	226.245	-1.8813	1.2052e-15	7.6513e-13		Zinc finger, PHD-type domain containing protein. (Os02t0658200-01)
Os02g0661100	152.275	284.697	-0.90275	2.87e-06	0.0003114	TREHALOSE-6-PHOSPHATE PHOSHPHATASE 1	Similar to Trehalose-6-phosphate phosphatase. (Os02t0661100-01);Similar to Trehalose-phosphate phosphatase. (Os02t0661100-02)
Os02g0662000	6635.59	16545.8	-1.3182	0.00015743	0.0079483	root-specific RCc3, hybrid proline- or glycine-rich protein 1	RCc3 protein. (Os02t0662000-01)
Os02g0668000	201.947	353.186	-0.80645	5.3763e-06	0.00053118		Membrane protein, At2g17000, predicted domain containing protein. (Os02t0668000-01);Hypothetical protein. (Os02t0668000-02)
Os02g0672100	145.632	330.582	-1.1827	0.001526	0.044467	INDETERMINATE DOMAIN 4, Suppressor of rid1, indeterminate domain 4	C2H2-type zinc finger transcription factor, Promotion of flowering (Os02t0672100-01)
Os02g0676800	8.01879	48.7104	-2.6028	3.6834e-07	5.4998e-05	ETHYLENE RESPONSE FACTOR 20	Similar to Dehydration responsive element binding protein 1E (DREB1E protein). (Os02t0676800-01)
Os02g0678300	14.8848	46.5593	-1.6452	0.00050098	0.019252		Similar to protein HOTHEAD. (Os02t0678300-01)
Os02g0681632	26.2448	60.7779	-1.2115	0.0014734	0.043247	RECEPTOR-LIKE CYTOPLASMIC KINASE 83	Peptidoglycan-binding Lysin subgroup domain containing protein. (Os02t0681632-00)
Os02g0686700	200.521	110.471	0.86009	8.5744e-05	0.0049486		Protein of unknown function DUF581 family protein. (Os02t0686700-01)
Os02g0694900	146.674	252.526	-0.78382	0.00021534	0.010087	MITOGEN-ACTIVATED PROTEIN KINASE KINASE 10-1	Protein kinase, catalytic domain domain containing protein. (Os02t0694900-00)
Os02g0700500	1028.09	1513.21	-0.55765	3.1549e-05	0.0022738	POLYAMINE UPTAKE TRANSPORTER 1	Polyamine uptake transporter, High-affinity spermidine transporter, Import of spermidine transported via phloem, Polyamine uptake (Os02t0700500-01)
Os02g0701600	962.13	1421.52	-0.56313	1.0787e-05	0.00093291	VITAMIN E DEFICIENT 4, gamma tocopherol methyltransferase	Similar to Tocopherol O-methyltransferase, chloroplast precursor (EC 2.1.1.95) (Gamma-tocopherol methyltransferase). (Os02t0701600-01)
Os02g0708400	1061.92	1406.27	-0.4052	0.001355	0.040351		Tetratricopeptide-like helical domain containing protein. (Os02t0708400-01)
Os02g0709350	117.237	49.6773	1.2388	4.5212e-05	0.0029846		Hypothetical conserved gene. (Os02t0709350-00)
Os02g0712400	702.118	508.035	0.46679	0.0011512	0.035641		Similar to H0721B11.1 protein. (Os02t0712400-01)
Os02g0714200	7441.02	9762.15	-0.3917	0.00033535	0.014193	pyrophosphate-fructose-6-phosphatephosphotransferase alpha subunit 1, PFP-alpha subunit 1	Similar to Pyrophosphate--fructose 6-phosphate 1-phosphotransferase alpha subunit (EC 2.7.1.90) (PFP) (6-phosphofructokinase, pyrophosphate dependent) (Pyrophosphate-dependent 6-phosphofructose-1-kinase) (PPi-PFK). (Os02t0714200-01)
Os02g0720600	270.673	124.31	1.1226	5.7644e-06	0.00056393		Peptidase A1 domain containing protein. (Os02t0720600-01)
Os02g0720900	228.279	99.0883	1.204	3.2984e-05	0.0023658		Peptidase A1 domain containing protein. (Os02t0720900-01);Hypothetical protein. (Os02t0720900-02);Similar to Aspartic proteinase nepenthesin-1. (Os02t0720900-04)
Os02g0733001	223.224	122.547	0.86516	0.00039538	0.015899		Similar to microtubule motor. (Os02t0733001-00)
Os02g0734600	148.611	233.499	-0.65187	0.0011633	0.03582		Similar to EFA27 for EF hand, abscisic acid, 27kD. (Os02t0734600-01);Similar to caleosin related protein. (Os02t0734600-02)
Os02g0741700	69.0735	136.429	-0.98195	0.00015008	0.0076976		Conserved hypothetical protein. (Os02t0741700-01)
Os02g0743500	687.161	927.209	-0.43225	0.0014075	0.041707		Similar to EDR1. (Os02t0743500-01);EDR1. (Os02t0743500-02)
Os02g0744900	57.8885	118.146	-1.0292	0.00017121	0.0084999	LIGHT-INDUCED YELLOW LEAF 1	Similar to Geranylgeranyl reductase (Fragment). (Os02t0744900-01)
Os02g0745100	106.389	14.5347	2.8718	4.1463e-15	2.4743e-12	LOW SILICON RICE 1	Aquaporin NIP III subfamily protein, Aquaporin, Silicon influx transporter, Arsenic species (As) uptake, Arsenite efflux, Selenite (Se) uptake, Water transport (Os02t0745100-01)
Os02g0755000	557.648	890.935	-0.67597	2.4898e-06	0.00027617	TUMOROUS SHOOT DEVELOPMENT 2	Putative methyltransferase, Pectin synthesis and methylesterification, Root development, Cellular adhesion (Os02t0755000-01)
Os02g0758000	317.013	521.403	-0.71786	0.00010888	0.0059718	24.1 KDA CLASS I HEAT SHOCK PROTEIN	Similar to Low molecular weight heat shock protein precursor (Mitochondrial small heat shock protein 22). (Os02t0758000-01)
Os02g0766600	493.85	244.673	1.0132	0.00088346	0.029586		Protein of unknown function DUF1685 family protein. (Os02t0766600-01)
Os02g0768300	77.5041	3.1654	4.6138	5.2343e-10	1.407e-07		Protein of unknown function DUF6, transmembrane domain containing protein. (Os02t0768300-01)
Os02g0768750	47.4297	109.205	-1.2032	3.4192e-05	0.0024233		Hypothetical conserved gene. (Os02t0768750-00)
Os02g0771700	2167.86	3177.52	-0.55163	0.0002469	0.011184	beta-1, 3-glucanase 9	Glycoside hydrolase, family 17 protein. (Os02t0771700-01)
Os02g0775300	22.9293	2.29797	3.3188	0.00014496	0.0075319		Conserved hypothetical protein. (Os02t0775300-01)
Os02g0776600	34.4655	6.28223	2.4558	3.977e-05	0.0026963		Hypothetical conserved gene. (Os02t0776600-00)
Os02g0788800	591.861	1226.29	-1.051	3.0786e-15	1.8747e-12	amino acid transporter-like 9	Amino acid transporter, transmembrane domain containing protein. (Os02t0788800-01);Similar to amino acid transporter family protein. (Os02t0788800-02)
Os02g0789600	139.342	220.649	-0.66312	0.0012829	0.038743		Similar to DEM2. (Os02t0789600-01)
Os02g0797500	1896.84	2746.82	-0.53416	0.00048635	0.018812	Aspartate aminotransferase	Similar to Plastidic aspartate aminotransferase. (Os02t0797500-01);Similar to Plastidic aspartate aminotransferase. (Os02t0797500-02)
Os02g0802700	228.621	394.079	-0.78553	9.9739e-05	0.0055627	Monogalactosyldiacylglycerol synthase	Similar to MGDG synthase type A. (Os02t0802700-01);Monogalactosyldiacylglycerol synthase, Salt, drought, submergence stress tolerance (Os02t0802700-02)
Os02g0806350	610.304	944.582	-0.63015	3.0973e-06	0.00032772		Hypothetical protein. (Os02t0806350-00)
Os02g0810100	1218.65	1744.24	-0.51731	2.7859e-05	0.0020627		Ankyrin repeat containing protein. (Os02t0810100-00)
Os02g0813083	848.291	469.065	0.85477	4.7652e-05	0.0030966	F-box protein 118	Conserved hypothetical protein. (Os02t0813083-00)
Os02g0817600	945.571	658.169	0.52273	0.00011769	0.0063835	IAA10	AUX/IAA protein family protein. (Os02t0817600-01);Similar to Auxin-responsive protein IAA10. (Os02t0817600-02);AUX/IAA protein family protein. (Os02t0817600-03)
Os02g0822900	60.3482	16.4891	1.8718	1.1705e-05	0.0009979	RECEPTOR-LIKE CYTOPLASMIC KINASE 91	Hypothetical conserved gene. (Os02t0822900-01)
Os02g0823100	241.043	80.0748	1.5899	1.6698e-12	7.3271e-10	PLASMA MEMBRANE INTRINSIC PROTEIN 1;3	Similar to Plasma membrane intrinsic protein (Plasma membrane integral protein ZmPIP1-5). (Os02t0823100-01)
Os02g0823700	22.8023	4.05257	2.4923	0.00069809	0.024785	XYLOGLUCAN ENDOTRANSGLUCOSYDASE/HYDROLASE 22	Similar to Xyloglucan endotransglucosylase/hydrolase 9. (Os02t0823700-00)
Os02g0834300	214.9	122.658	0.80903	0.00015015	0.0076976		Beta tubulin, autoregulation binding site domain containing protein. (Os02t0834300-01)
Os03g0102200	496.413	315.491	0.65394	3.4361e-05	0.0024295	similar to DNA-directed RNA polymerase	Similar to DNA-directed RNA polymerase II 14.5 kDa polypeptide (EC 2.7.7.6) (RPB9) (RPB14.5). (Os03t0102200-01)
Os03g0103400	258.545	164.298	0.65411	0.00064687	0.023481		GRAS transcription factor domain containing protein. (Os03t0103400-01)
Os03g0105500	325.111	0.347277	9.8706	1.231e-47	2.8254e-44		Conserved hypothetical protein. (Os03t0105500-01)
Os03g0107300	155.186	12.6777	3.6136	1.1449e-26	1.4234e-23	LOW SILICON RICE 2	Anion transporter, Silicon efflux transporter, Arsenic species (As) uptake (Os03t0107300-01)
Os03g0111200	1002.52	1866.24	-0.89651	5.2946e-11	1.6806e-08	REMORIN 1.3	Similar to Remorin. (Os03t0111200-01)
Os03g0113500	1711.74	2417.32	-0.49795	0.0016365	0.046771		Conserved hypothetical protein. (Os03t0113500-01)
Os03g0115800	990.183	0	Inf	5.8145e-91	4.3373e-87		Conserved hypothetical protein. (Os03t0115800-01);Conserved hypothetical protein. (Os03t0115800-02)
Os03g0116400	1270.7	1735.66	-0.44985	0.0002261	0.010492	Rhomboid 7, RHOMBOID 7	Similar to Membrane protein. (Os03t0116400-01)
Os03g0118800	80.1702	158.471	-0.98308	0.00010884	0.0059718		Similar to Hydroxymethylglutaryl-CoA synthase. (Os03t0118800-01)
Os03g0121300	2140.27	3367.32	-0.65381	2.3373e-08	4.4705e-06	class III peroxidase 34	Similar to Peroxidase 1. (Os03t0121300-01);Similar to Peroxidase 5. (Os03t0121300-02)
Os03g0123100	754.523	433.453	0.79969	0.00034101	0.014392	SUMO-conjugating enzyme 2, Ubiquitin-conjugating enzyme 2	Similar to SUMO E2 conjugating enzyme SCE1. (Os03t0123100-01)
Os03g0124300	531.188	735.626	-0.46975	0.00099166	0.032267		Similar to ATP binding protein. (Os03t0124300-01);Similar to ATP binding protein. (Os03t0124300-02)
Os03g0128000	2072.89	2771.85	-0.41921	0.00030955	0.013405	FASCICLIN-LIKE ARABINOGALACTAN PROTEIN 2	FAS1 domain domain containing protein. (Os03t0128000-01);Similar to Fasciclin-like protein FLA2. (Os03t0128000-02)
Os03g0130700	635.685	856.882	-0.43078	0.0018054	0.049972		Conserved hypothetical protein. (Os03t0130700-01);Conserved hypothetical protein. (Os03t0130700-02);Conserved hypothetical protein. (Os03t0130700-03)
Os03g0132000	612.194	1120.3	-0.87183	8.2394e-11	2.5087e-08	acyl-CoA synthetase 4	Similar to 4-coumarate-CoA ligase-like protein. (Os03t0132000-01)
Os03g0132800	535.141	732.303	-0.45252	0.0018043	0.049972	RECEPTOR-LIKE CYTOPLASMIC KINASE 98	Similar to protein kinase-like protein [Oryza sativa (japonica cultivar-group)]. (Os03t0132800-01)
Os03g0134300	1377.38	1919.03	-0.47845	0.00015218	0.0077598		Similar to ATP phosphoribosyl transferase. (Os03t0134300-01)
Os03g0140700	231.746	481.724	-1.0557	1.506e-10	4.4055e-08		Tetratricopeptide-like helical domain containing protein. (Os03t0140700-01)
Os03g0142600	23.6188	67.6144	-1.5174	6.7477e-05	0.0040922		Myb transcription factor domain containing protein. (Os03t0142600-00)
Os03g0142800	1915.15	2524.37	-0.39846	0.00075406	0.026193	MULTIDRUG RESISTANCE-ASSOCIATED PROTEIN 13	Similar to MRP-like ABC transporter. (Os03t0142800-01);Hypothetical conserved gene. (Os03t0142800-02)
Os03g0143400	392.683	564.364	-0.52326	0.00052563	0.02003	heat-shock protein 60	Similar to mitochondrial chaperonin-60 [Oryza sativa (japonica cultivar-group)]. (Os03t0143400-01)
Os03g0143900	117.054	35.0023	1.7417	2.8137e-05	0.002073		Plant disease resistance response protein family protein. (Os03t0143900-00)
Os03g0145050	322.828	567.157	-0.81298	2.0696e-07	3.2847e-05		Hypothetical gene. (Os03t0145050-01)
Os03g0146800	193.969	30.1238	2.6868	1.1454e-22	1.1392e-19	-	-
Os03g0147400	25.2158	61.2445	-1.2803	0.00087925	0.029504	silicon efflux transporter 4, Si efflux transporter 4	Divalent ion symporter domain containing protein. (Os03t0147400-01);Similar to cDNA clone:J023091E03, full insert sequence. (Os03t0147400-02)
Os03g0149300	40.5919	0.347277	6.869	1.7586e-13	8.8937e-11		Protein of unknown function DUF6, transmembrane domain containing protein. (Os03t0149300-01)
Os03g0161100	651.375	983.287	-0.59412	0.00093725	0.031018		Similar to Viral A-type inclusion protein repeat containing protein, expressed. (Os03t0161100-00)
Os03g0161400	28.7963	76.4955	-1.4095	5.7322e-05	0.0036441		Similar to IQ calmodulin-binding motif family protein, expressed. (Os03t0161400-01)
Os03g0170701	106.43	266.579	-1.3247	1.9549e-06	0.00022522		Hypothetical gene. (Os03t0170701-00)
Os03g0171300	513.334	749.299	-0.54564	0.00012144	0.006494	INCREASED LEAF INCLINATION 6	Similar to DNA-binding protein-like. (Os03t0171300-01)
Os03g0171900	123.558	225.527	-0.86811	3.4637e-05	0.0024432		Similar to Alanine:glyoxylate aminotransferase-like protein (Fragment). (Os03t0171900-01);Similar to Alanine:glyoxylate aminotransferase-like protein (Fragment). (Os03t0171900-02)
Os03g0185700	57.9021	8.85918	2.7084	1.7159e-08	3.4133e-06		Transferase family protein. (Os03t0185700-01)
Os03g0186900	149.679	499.434	-1.7384	7.2528e-10	1.8922e-07	aspartic protease 25, rice anther down-regulated by chilling 1	Radc1. (Os03t0186900-01)
Os03g0187500	339.156	193.198	0.81187	0.00014836	0.0076457	Os_F0701	Leucine-rich repeat, cysteine-containing subtype containing protein. (Os03t0187500-01);Similar to Leucine Rich Repeat family protein, expressed. (Os03t0187500-02)
Os03g0188900	206.004	108.821	0.92072	3.6228e-05	0.0025198	HOMEOBOX GENE 13	Similar to HAHB-7 (Fragment). (Os03t0188900-01);Similar to cDNA clone:001-200-F05, full insert sequence. (Os03t0188900-02)
Os03g0191400	47.1196	11.0184	2.0964	6.0888e-05	0.003808	small GTP-binding protein OsRab6B2	Small GTPase, Regulation of iron homeostasis (Os03t0191400-01)
Os03g0195475	39.0515	121.074	-1.6324	6.0634e-06	0.00058174		Hypothetical protein. (Os03t0195475-00)
Os03g0219100	250.559	160.738	0.64044	0.0011254	0.035162		Cellular retinaldehyde-binding/triple function, C-terminal domain containing protein. (Os03t0219100-01)
Os03g0223000	7414.54	9451.1	-0.35012	0.0015693	0.045416	RECEPTOR-LIKE CYTOPLASMIC KINASE 377	Similar to atypical receptor-like kinase MARK. (Os03t0223000-01);Similar to Atypical receptor-like kinase MARK. (Os03t0223000-02);Similar to atypical receptor-like kinase MARK. (Os03t0223000-03)
Os03g0232200	155.001	77.7401	0.99555	0.00057347	0.021389	PLETHORA 9	Similar to BABY BOOM. (Os03t0232200-01)
Os03g0233800	273.338	413.823	-0.59833	0.00030326	0.013248		Protein of unknown function DUF547 domain containing protein. (Os03t0233800-01);Protein of unknown function DUF547 domain containing protein. (Os03t0233800-02)
Os03g0234900	588.994	224.013	1.3947	1.1587e-14	6.6487e-12	class III peroxidase 39	Similar to Peroxidase (EC 1.11.1.7). (Os03t0234900-01)
Os03g0236200	71.5128	10.2556	2.8018	1.3319e-05	0.0011226	GLUTAMATE DECARBOXYLASE	Similar to Glutamate decarboxylase isozyme 3 (EC 4.1.1.15). (Os03t0236200-01)
Os03g0239300	406.592	244.285	0.73502	1.4089e-05	0.0011776		Zinc finger, C2H2-type domain containing protein. (Os03t0239300-01);Zinc finger, C2H2-type domain containing protein. (Os03t0239300-02);Zinc finger, C2H2-type domain containing protein. (Os03t0239300-03)
Os03g0241900	179.929	512.734	-1.5108	8.18e-10	2.0684e-07		Similar to Senescence-associated protein 12. (Os03t0241900-02);Similar to Senescence-associated protein, expressed. (Os03t0241900-03)
Os03g0243900	168.179	331.405	-0.97859	3.1138e-06	0.0003283		Similar to Thaumatin-like protein. (Os03t0243900-01)
Os03g0245500	890.198	343.577	1.3735	8.1315e-12	2.8213e-09		Curculin-like (mannose-binding) lectin domain containing protein. (Os03t0245500-01)
Os03g0250000	21.155	2.6794	2.981	0.00025623	0.011532	SNRK2-CALCIUM SENSOR 1	Conserved hypothetical protein. (Os03t0250000-01);Conserved hypothetical protein. (Os03t0250000-02)
Os03g0256800	148.097	67.9212	1.1246	1.3555e-05	0.0011393		Similar to RhoGAP domain containing protein, expressed. (Os03t0256800-00)
Os03g0259700	684.575	939.074	-0.45603	0.00075238	0.026165		Protein of unknown function DUF1630 family protein. (Os03t0259700-01)
Os03g0264600	728.51	985.574	-0.43602	0.0010747	0.03415		Similar to Nucleic acid binding protein. (Os03t0264600-00)
Os03g0269000	342.832	484.421	-0.49876	0.0017119	0.048233		Short chain alcohol dehydrogenase-like. (Os03t0269000-01);Short chain alcohol dehydrogenase-like. (Os03t0269000-02)
Os03g0275300	719.602	985.677	-0.45392	0.0008315	0.028364		Hypothetical conserved gene. (Os03t0275300-01)
Os03g0276500	6380.65	11095.5	-0.7982	3.9006e-06	0.00040272	71.1 KDA CLASS I HEAT SHOCK PROTEIN	Similar to Heat shock protein 70. (Os03t0276500-01)
Os03g0278400	249.869	434.798	-0.79918	0.00010789	0.0059393		Similar to ADP ribosylation GTPase-like protein (Fragment). (Os03t0278400-01)
Os03g0285200	88.4138	30.3199	1.544	0.00098561	0.032105		Conserved hypothetical protein. (Os03t0285200-01)
Os03g0286500	4023.33	5850.59	-0.54019	2.9557e-06	0.00031724		Similar to RNA-binding region containing protein 1 (HSRNASEB) (ssDNA binding protein SEB4) (CLL-associated antigen KW-5). Splice isoform 2. (Os03t0286500-01)
Os03g0288700	1262.33	1661.78	-0.39664	0.0013308	0.039788		Phosphatidic acid phosphatase type 2/haloperoxidase domain containing protein. (Os03t0288700-01)
Os03g0290900	679.636	1046.9	-0.62329	0.0007042	0.024925	trichome birefringence-like 18	Protein of unknown function DUF231, plant domain containing protein. (Os03t0290900-01)
Os03g0292200	499.62	732.235	-0.55148	0.0011535	0.035641		Adenine nucleotide translocator 1 domain containing protein. (Os03t0292200-01)
Os03g0297400	2786.13	3749.3	-0.42836	0.0001672	0.0083427		Acyl transferase domain containing protein. (Os03t0297400-01)
Os03g0297800	357.738	516.402	-0.52959	0.00068169	0.024477		Similar to Leucine Rich Repeat family protein, expressed. (Os03t0297800-01)
Os03g0297850	314.633	624.695	-0.98948	0.0013105	0.03937		Hypothetical protein. (Os03t0297850-00)
Os03g0297900	1625.11	851.607	0.93228	5.6426e-10	1.5032e-07	LACCASE 12	Similar to laccase 90c. (Os03t0297900-00)
Os03g0299600	973.396	1342.6	-0.46393	0.00038183	0.015599		Wound-induced protein, Wun1 domain containing protein. (Os03t0299600-01)
Os03g0302900	1496.19	2104.38	-0.4921	0.00034972	0.014656	sword shape dwarf1	Conserved hypothetical protein. (Os03t0302900-01)
Os03g0304500	2069.25	2891.18	-0.48255	4.5652e-05	0.003007		Tetratricopeptide-like helical domain containing protein. (Os03t0304500-01)
Os03g0307000	473.906	690.9	-0.54388	0.00015858	0.0079793		Conserved hypothetical protein. (Os03t0307000-01)
Os03g0324200	348.721	238.034	0.5509	0.0014347	0.042301	ETHYLENE INSENSITIVE-LIKE GENE 1	Transcription factor involved in the ethylene signal transduction pathway, Positive regulator of ethylene response, Wound signaling (Os03t0324200-01);Similar to cDNA clone:J033123C05, full insert sequence. (Os03t0324200-02)
Os03g0324300	256.261	150.716	0.76579	0.00010648	0.0058726	ETHYLENE INSENSITIVE3-LIKE1, ETHYLENE INSENSITIVE3-LIKE 1, maohuzi6, maohuzi 6	Similar to ETHYLENE-INSENSITIVE3-like 1 protein. (Os03t0324300-02);Similar to EIL3. (Os03t0324300-03);Similar to ETHYLENE-INSENSITIVE3-like 1 protein. (Os03t0324300-04);Similar to ETHYLENE-INSENSITIVE3-like 1 protein. (Os03t0324300-05);Similar to cDNA clone:J033123C05, full insert sequence. (Os03t0324300-06)
Os03g0332900	271.916	170.478	0.67358	0.0003463	0.014553		Protein kinase, core domain containing protein. (Os03t0332900-01)
Os03g0338400	137.372	426.309	-1.6338	7.1898e-09	1.5324e-06	basic helix-loop-helix protein 166	Basic helix-loop-helix dimerisation region bHLH domain containing protein. (Os03t0338400-01)
Os03g0342900	209.908	345.564	-0.7192	0.0005583	0.020887		Dormancyauxin associated family protein. (Os03t0342900-02);Dormancyauxin associated family protein. (Os03t0342900-04)
Os03g0359700	19.5546	3.28242	2.5747	0.0015892	0.045904		Mo25-like domain containing protein. (Os03t0359700-01);Similar to protein Mo25. (Os03t0359700-02)
Os03g0360800	27.0488	5.67557	2.2527	0.00060488	0.022255		Similar to Endonuclease/Exonuclease/phosphatase family protein, expressed. (Os03t0360800-00)
Os03g0368900	14.2326	0.973526	3.8698	0.0015163	0.044268	class III peroxidase 45	Haem peroxidase family protein. (Os03t0368900-01)
Os03g0372600	15.0111	0.977168	3.9413	0.00054431	0.020455		Heavy metal-associated domain, HMA domain containing protein. (Os03t0372600-00)
Os03g0376000	216.285	325.768	-0.59091	0.0011704	0.036003		emp24/gp25L/p24 family protein. (Os03t0376000-01)
Os03g0388500	1116.79	506.575	1.1405	2.0518e-05	0.0016069		Similar to Anther ethylene-upregulated protein ER1 (Fragment). (Os03t0388500-01)
Os03g0406200	2589.99	3397.73	-0.39162	0.00065748	0.0238	EUKARYOTIC ELONGATION FACTOR 1-BETA2	Elongation factor 1 beta 2. (Os03t0406200-01);Elongation factor 1 beta 2. (Os03t0406200-02)
Os03g0407050	41.2292	114.227	-1.4702	6.6284e-07	8.9089e-05		Hypothetical protein. (Os03t0407050-00)
Os03g0407100	132.28	213.366	-0.68974	0.0011347	0.035379		Protein of unknown function DUF1677, plant family protein. (Os03t0407100-00)
Os03g0418700	94.6483	192.738	-1.026	5.74e-05	0.0036441		Conserved hypothetical protein. (Os03t0418700-01);Hypothetical conserved gene. (Os03t0418700-02)
Os03g0426350	729.027	13.7335	5.7302	2.5793e-135	2.5653e-131		Conserved hypothetical protein. (Os03t0426350-00)
Os03g0431100	1014.17	1762.48	-0.79731	7.6796e-06	0.00070506		Conserved hypothetical protein. (Os03t0431100-01)
Os03g0440900	997.584	618.454	0.68977	3.6865e-07	5.4998e-05	OsI-BAK1	Similar to LRR protein. (Os03t0440900-01);Similar to LRR protein. (Os03t0440900-02)
Os03g0445700	167.205	80.6332	1.0522	1.4799e-05	0.0012198	LATERAL ORGAN BOUNDARIES DOMAIN 37, lateral organ boundaries domain protein 37	Similar to LOB domain protein 39. (Os03t0445700-01)
Os03g0576700	6222.18	8245.08	-0.40611	0.0017361	0.048733		Similar to 60S ribosomal protein L13 (BBC1 protein homolog). (Os03t0576700-01)
Os03g0582000	177.573	758.468	-2.0947	1.7799e-12	7.697e-10		Similar to Glutamate formiminotransferase. (Os03t0582000-01);Formiminotransferase, N-terminal domain containing protein. (Os03t0582000-02);Similar to Glutamate formiminotransferase. (Os03t0582000-03)
Os03g0597600	1941.83	2648.82	-0.44793	0.00014437	0.0075177	ASPARAGINASE 1	Similar to L-asparaginase (EC 3.5.1.1) (L-asparagine amidohydrolase). (Os03t0597600-01)
Os03g0604566	124.191	53.1386	1.2247	8.7627e-06	0.00077816		Conserved hypothetical protein. (Os03t0604566-01)
Os03g0610400	101.672	20.9413	2.2795	0.00062097	0.022734		Zinc finger, C2H2-like domain containing protein. (Os03t0610400-01)
Os03g0620800	1300.31	1695.48	-0.38284	0.0016458	0.046902	SLY1	Similar to SEC1-family transport protein SLY1 (AtSLY1). (Os03t0620800-01);Similar to SEC1 family transport protein SLY1. (Os03t0620800-02)
Os03g0629800	66.6769	0	Inf	3.3817e-23	3.4794e-20		Conserved hypothetical protein. (Os03t0629800-01)
Os03g0633500	964.744	645.006	0.58083	0.0010987	0.034801	IAA11	A member of Aux/IAA family protein, Regulation of lateral root initiation (Os03t0633500-01)
Os03g0636700	1055.97	1447.45	-0.45494	0.00038955	0.015744		IQ calmodulin-binding region domain containing protein. (Os03t0636700-00)
Os03g0640000	412.825	219.088	0.91402	2.7013e-05	0.0020166	Patatin-related phospholipase A III beta	Patatin family protein. (Os03t0640000-00)
Os03g0648600	157.148	42.3845	1.8905	6.705e-12	2.4104e-09		Similar to Zinc finger, C3HC4 type family protein, expressed. (Os03t0648600-00)
Os03g0661300	459.592	1115.63	-1.2794	2.675e-05	0.0020055	BETA TUBULIN 8	Beta-tubulin , Microtubules formation (Os03t0661300-01)
Os03g0667500	33.5047	75.5635	-1.1733	0.0006022	0.022183	ZINC TRANSPORTER 10	Similar to Metal transport protein. (Os03t0667500-01)
Os03g0675300	196.685	111.126	0.8237	0.00018101	0.0087905		Hypothetical conserved gene. (Os03t0675300-01)
Os03g0680800	59.9486	25.2583	1.247	0.0015002	0.043971	BTH-induced homeodomain protein 1, BLH6-like 1, BEL1-LIKE HOMEODOMAIN6-like 1	Similar to cDNA clone:J023038C04, full insert sequence. (Os03t0680800-01);Similar to Prep (Fragment). (Os03t0680800-02);Similar to Associated with HOX family protein, expressed. (Os03t0680800-03);Similar to cDNA clone:J023038C04, full insert sequence. (Os03t0680800-04);Similar to cDNA clone:J023038C04, full insert sequence. (Os03t0680800-05)
Os03g0690500	50.4479	11.8423	2.0908	7.8609e-06	0.00071293		Similar to Oxidoreductase, 2OG-Fe oxygenase family protein, expressed. (Os03t0690500-00)
Os03g0703300	87.3616	151.573	-0.79495	0.0011387	0.03542		Calponin-like actin-binding domain containing protein. (Os03t0703300-01);Hypothetical conserved gene. (Os03t0703300-02)
Os03g0705800	208.223	94.1241	1.1455	2.4033e-07	3.7155e-05		Protein of unknown function DUF3049 domain containing protein. (Os03t0705800-00)
Os03g0707600	3471.63	4940.96	-0.50918	6.5296e-06	0.00061851	SLENDER RICE1	DELLA repressor protein, Gibberellin signaling (Os03t0707600-01)
Os03g0709300	73.8896	15.3266	2.2693	2.5822e-05	0.0019456	UCLACYANIN-LIKE PROTEIN 9	Similar to Chemocyanin precursor (Basic blue protein) (Plantacyanin). (Os03t0709300-01)
Os03g0710700	432.684	596.287	-0.46269	0.0016262	0.046565		Similar to predicted protein. (Os03t0710700-00)
Os03g0712500	177.068	282.961	-0.6763	0.0003532	0.014767		Hypothetical protein. (Os03t0712500-00)
Os03g0715400	177.381	284.709	-0.68263	0.00035447	0.014792		Membrane protein,Tapt1/CMV receptor domain containing protein. (Os03t0715400-01)
Os03g0719000	163.333	77.2361	1.0805	0.0010362	0.033244		MAP65/ASE1 family protein. (Os03t0719000-01)
Os03g0722500	1108.06	595.515	0.89582	7.6694e-06	0.00070506		Glycoside hydrolase, family 17 protein. (Os03t0722500-01);Glycoside hydrolase, family 17 protein. (Os03t0722500-02)
Os03g0725400	562.24	820.951	-0.54611	0.00011309	0.0061687	OsWD40-86	Similar to WD-repeat protein 5 (BMP2-induced 3-kb gene protein) (WD-repeat protein BIG-3). (Os03t0725400-01);Similar to WD-repeat protein 5 (BMP2-induced 3-kb gene protein) (WD-repeat protein BIG-3). (Os03t0725400-02);Similar to WD-repeat protein 5 (BMP2-induced 3-kb gene protein) (WD-repeat protein BIG-3). (Os03t0725400-03)
Os03g0725800	2552.8	3922.68	-0.61976	0.00093959	0.031018	basic helix-loop-helix protein 018	Helix-loop-helix DNA-binding domain containing protein. (Os03t0725800-01)
Os03g0737300	66.9023	22.4634	1.5745	0.00023654	0.010841		HAD-superfamily phosphatase, subfamily IIIC domain containing protein. (Os03t0737300-01)
Os03g0738300	447.532	277.109	0.69154	0.00017294	0.0085435		Hypothetical protein. (Os03t0738300-01)
Os03g0738600	4330.39	10458.9	-1.2722	1.4279e-06	0.00017533	LIPOXYGENASE L2	Lipoxygenase, Seed germination and longevity (Os03t0738600-01)
Os03g0743500	442.1	276.665	0.67623	4.5865e-05	0.0030144	CALMODULIN-LIKE PROTEIN 4	Calcium-binding EF-hand domain containing protein. (Os03t0743500-01);Similar to Calmodulin 1 (Fragment). (Os03t0743500-02)
Os03g0743900	1142.75	660.28	0.79136	0.00012918	0.0068709	ATP sulfurylase	Similar to ATP sulfurylase. (Os03t0743900-01)
Os03g0747900	624.432	982.781	-0.65433	1.7536e-06	0.00020681	Myosin XIE, Myosin class XI E	Similar to Myosin heavy chain class XI E1 protein. (Os03t0747900-00)
Os03g0759000	119.908	66.2045	0.85693	0.0014128	0.041821		Similar to F16A14.19. (Os03t0759000-01)
Os03g0760700	2477.25	3370.95	-0.44442	0.00012093	0.006491		Similar to Aspartate-semialdehyde dehydrogenase (EC 1.2.1.11) (Fragment). (Os03t0760700-01)
Os03g0764000	129.451	56.6924	1.1912	2.4959e-05	0.001895		Acyl-CoA N-acyltransferase domain containing protein. (Os03t0764000-00)
Os03g0765200	1123.37	1485.61	-0.40323	0.0011856	0.036396	Type I Signal Peptidase 2, TYPE I SIGNAL PEPTIDASE 2	Similar to Signal peptidase I family protein, expressed. (Os03t0765200-01);Similar to Signal peptidase I (Leader peptidase I). (Os03t0765200-02)
Os03g0776400	14.5414	0.350919	5.3729	6.1093e-05	0.003808		Conserved hypothetical protein. (Os03t0776400-01)
Os03g0780500	3410.99	4545.5	-0.41425	0.00059628	0.021992	cystathionine b-synthase domain containing protein OsCBSIMPDH1, CBS domain containing protein OsCBSIMPDH1	Similar to inosine-5-monophosphate dehydrogenase 2. (Os03t0780500-01);Similar to Inosine-5'-monophosphate dehydrogenase (EC 1.1.1.205) (IMP dehydrogenase) (IMPDH) (IMPD). (Os03t0780500-02)
Os03g0788600	211.069	110.006	0.94014	0.0011396	0.03542	FASCICLIN-LIKE ARABINOGALACTAN PROTEIN 24	FAS1 domain domain containing protein. (Os03t0788600-02)
Os03g0807500	596.93	341	0.80779	8.8975e-05	0.0050683	stellacyanin-like protein 1	Cupredoxin domain containing protein. (Os03t0807500-00)
Os03g0808100	112.029	194.946	-0.7992	0.00030798	0.013405	CELLULOSE SYNTHASE A2	Similar to Cellulose synthase-5. (Os03t0808100-01);Similar to Cellulose synthase BoCesA5. (Os03t0808100-02);Similar to Cellulose synthase BoCesA5. (Os03t0808100-03)
Os03g0811400	259.9	167.429	0.63441	0.00094781	0.03116	basic helix-loop-helix protein 041	Similar to DNA binding protein. (Os03t0811400-00)
Os03g0816950	59.8573	135.281	-1.1764	0.00093572	0.031018		Hypothetical protein. (Os03t0816950-01)
Os03g0817500	315.929	132.389	1.2548	1.6453e-10	4.6755e-08	trichome birefringence-like 3	Protein of unknown function DUF231, plant domain containing protein. (Os03t0817500-01)
Os03g0849800	258.969	430.883	-0.73452	9.2152e-06	0.00080872		Nucleotide-diphospho-sugar transferase domain containing protein. (Os03t0849800-01);Hypothetical conserved gene. (Os03t0849800-02)
Os03g0856700	75.9892	278.287	-1.8727	6.1667e-06	0.00058786	GIBBERELLIN 20-OXIDASE 1	Gibberellin 20 oxidase 1 (EC 1.14.11.-) (Gibberellin C-20 oxidase 1) (GA 20-oxidase 1) (Os20ox). (Os03t0856700-01);GA 20-oxidase1, GA metabolism (Os03t0856700-02)
Os04g0109400	23.8979	1.66808	3.8406	0.00085631	0.028969		Similar to H0201G08.3 protein. (Os04t0109400-00)
Os04g0125700	234.681	2963.7	-3.6586	4.8233e-21	4.4975e-18		Concanavalin A-like lectin/glucanase domain containing protein. (Os04t0125700-01)
Os04g0127800	100.301	15.204	2.7218	2.4994e-13	1.1652e-10	KIX domain protein 3, Mediator 15_1	Coactivator CBP, KIX domain containing protein. (Os04t0127800-01)
Os04g0128001	16.0513	1.04547	3.9405	0.00020131	0.00958		Similar to OSIGBa0126J24.7 protein. (Os04t0128001-00)
Os04g0135400	21.7927	69.6043	-1.6753	1.1226e-05	0.00096528	RECEPTOR-LIKE CYTOPLASMIC KINASE 128	Similar to OSIGBa0140L04.2 protein. (Os04t0135400-00)
Os04g0140666	109.584	244.926	-1.1603	4.1066e-08	7.5637e-06		Similar to OSIGBa0124C14.6 protein. (Os04t0140666-01)
Os04g0147200	193.787	382.388	-0.98057	3.7179e-05	0.0025674		Protein of unknown function DUF594 domain containing protein. (Os04t0147200-01)
Os04g0165700	1508.74	822.528	0.8752	2.8483e-05	0.0020933	beta-cyanoalanine synthase	Cysteine synthase (EC 2.5.1.47). (Os04t0165700-01)
Os04g0228100	836.272	1146	-0.45456	0.00045357	0.017878		Similar to H0209A05.2 protein. (Os04t0228100-01)
Os04g0244800	1435.72	648.081	1.1475	7.5311e-10	1.9372e-07		Heavy metal transport/detoxification protein domain containing protein. (Os04t0244800-01)
Os04g0248050	28.8073	2.6794	3.4265	0.00024812	0.011217		Conserved hypothetical protein. (Os04t0248050-00)
Os04g0261400	634.922	408.901	0.63483	6.5685e-05	0.0040176		Cytochrome c region domain containing protein. (Os04t0261400-01)
Os04g0287400	354.115	230.276	0.62086	0.00041802	0.016675	WRKY GENE 51	WRKY transcription factor, Positive regulator in defense response, Negative regulator in GA signaling (Os04t0287400-01)
Os04g0291100	223.644	138.848	0.6877	0.001326	0.039723		Similar to Short-chain dehydrogenase Tic32. (Os04t0291100-01);Hypothetical conserved gene. (Os04t0291100-02)
Os04g0295000	170.993	90.708	0.91464	0.0011206	0.035159		Protein phosphatase inhibitor family protein. (Os04t0295000-01)
Os04g0295200	64.6753	151.365	-1.2267	0.00074582	0.025967		Hypothetical protein. (Os04t0295200-01)
Os04g0298700	216.88	114.911	0.91638	1.6176e-05	0.0013151		Clp, N-terminal domain containing protein. (Os04t0298700-01)
Os04g0308600	430.4	1872.59	-2.1213	1.6734e-56	5.5477e-53		Similar to H0211A12.11 protein. (Os04t0308600-00)
Os04g0309400	577.242	809.817	-0.48842	0.00055815	0.020887		Conserved hypothetical protein. (Os04t0309400-01);Non-protein coding transcript. (Os04t0309400-02)
Os04g0309900	293.803	1131.56	-1.9454	1.2706e-18	9.9769e-16		Similar to H0211A12.5 protein. (Os04t0309900-00)
Os04g0321700	624.773	1041.02	-0.73659	6.2991e-08	1.1255e-05	SERINE CARBOXYPEPTIDASE 23	Similar to Serine carboxypeptidase I precursor (EC 3.4.16.5) (Carboxypeptidase C). (Os04t0321700-01);Similar to Serine carboxypeptidase I precursor (EC 3.4.16.5) (Carboxypeptidase C). (Os04t0321700-02)
Os04g0325300	28.8309	67.5398	-1.2281	0.00069305	0.024706		Similar to NB-ARC domain containing protein, expressed. (Os04t0325300-01)
Os04g0337201	351.522	672.262	-0.93541	0.0017088	0.048192		Similar to OSIGBa0137O04.8 protein. (Os04t0337201-00)
Os04g0339800	39.6978	0	Inf	2.4226e-13	1.1474e-10		Similar to predicted protein. (Os04t0339800-00)
Os04g0340800	136.749	64.6656	1.0805	4.0322e-05	0.002709		Conserved hypothetical protein. (Os04t0340800-01);Conserved hypothetical protein. (Os04t0340800-02)
Os04g0355401	17.5864	0	Inf	9.7664e-07	0.00012781		Hypothetical protein. (Os04t0355401-01)
Os04g0359100	462.308	278.124	0.73313	0.00013562	0.0071748		Alcohol dehydrogenase superfamily, zinc-containing protein. (Os04t0359100-01)
Os04g0372800	3535.09	4520.3	-0.35467	0.0017626	0.04906		Nucleotide-binding, alpha-beta plait domain containing protein. (Os04t0372800-01)
Os04g0374400	16.9126	69.1852	-2.0324	2.9646e-07	4.5597e-05		Hypothetical conserved gene. (Os04t0374400-00)
Os04g0390000	1349.24	986.897	0.45117	0.0017941	0.049753		Similar to OSIGBa0096P03.7 protein. (Os04t0390000-01);Similar to OSIGBa0096P03.7 protein. (Os04t0390000-02);Similar to OSIGBa0096P03.7 protein. (Os04t0390000-03);Similar to OSIGBa0096P03.7 protein. (Os04t0390000-04)
Os04g0392300	113.192	42.2662	1.4212	1.5357e-06	0.00018703	OsSTA122	Hypothetical conserved gene. (Os04t0392300-00)
Os04g0403900	686.347	993.374	-0.5334	0.00030914	0.013405		Similar to H0502B11.1 protein. (Os04t0403900-00)
Os04g0412300	315.952	610.818	-0.95104	6.7892e-06	0.00064106		Similar to H0717B12.10 protein. (Os04t0412300-01);Glycoside hydrolase, family 17 protein. (Os04t0412300-02)
Os04g0416700	512.492	243.605	1.073	0.00041259	0.016481		Harpin-induced 1 domain containing protein. (Os04t0416700-01)
Os04g0417800	151.284	238.859	-0.6589	0.00097784	0.031922	OsWD40-100	WD40 repeat-like domain containing protein. (Os04t0417800-01)
Os04g0443951	53.0136	11.6558	2.1853	1.7931e-05	0.0014383		Hypothetical protein. (Os04t0443951-00)
Os04g0444300	708.546	454.826	0.63955	3.9172e-05	0.0026685	OsARGOS	Similar to ARGOS. (Os04t0444300-01)
Os04g0445900	31.211	6.38105	2.2902	0.00017734	0.0086688		Similar to OSIGBa0140O07.10 protein. (Os04t0445900-00)
Os04g0446500	3478.79	4568.23	-0.39305	0.00053967	0.020358	FK506 binding protein 58, FK506 binding protein 53a, brassinosteroid receptor kinase (BRI1)-interacting protein 122, BRI1-interacting protein 122, brassinosteroid receptor kinase-interacting protein 122	Similar to OSIGBa0140O07.15 protein. (Os04t0446500-01);Similar to FK506-binding protein 2 precursor (EC 5.2.1.8) (Peptidyl-prolyl cis- trans isomerase) (PPIase) (Rotamase) (FKBP-13) (FKBP-15). (Os04t0446500-02)
Os04g0449450	64.5958	146.909	-1.1854	6.2207e-05	0.0038589		Hypothetical gene. (Os04t0449450-00)
Os04g0450000	250.891	70.8659	1.8239	3.8178e-05	0.0026127		Zinc finger, FYVE/PHD-type domain containing protein. (Os04t0450000-01)
Os04g0460300	146.172	312.337	-1.0954	8.1995e-09	1.7352e-06	amino acid transporter-like 13	Amino acid transporter, transmembrane domain containing protein. (Os04t0460300-01)
Os04g0461400	473.229	708.816	-0.58287	6.3887e-05	0.0039386		Conserved hypothetical protein. (Os04t0461400-01);Hypothetical gene. (Os04t0461400-02)
Os04g0461800	815.654	1206.4	-0.56468	1.4226e-05	0.0011823	DEEP WATER TOLERANCE 2	Actin-binding FH2 domain containing protein. (Os04t0461800-01)
Os04g0462400	554.952	187.483	1.5656	4.5443e-06	0.00046278	lysine-histidine-like transporter 9, lysine and histidine transporter 4	Similar to lysine/histidine transporter. (Os04t0462400-01)
Os04g0463000	96.056	265.673	-1.4677	4.1315e-12	1.6659e-09		Serine/threonine protein kinase domain containing protein. (Os04t0463000-01)
Os04g0463500	381.552	543.669	-0.51085	0.00092882	0.030828	ANTHRANILATE SYNTHASE BETA-SUBUNIT 1	Similar to Anthranilate synthase beta chain. (Os04t0463500-01)
Os04g0464750	465.368	252.495	0.88212	0.00094929	0.03116	-	-
Os04g0467901	1779.37	2408.54	-0.4368	0.00023307	0.010723		Similar to OSIGBa0128P10.5 protein. (Os04t0467901-00)
Os04g0469800	201.007	303.857	-0.59615	0.0011608	0.035782	DWARF SHINKANEAIKOKU OR NOHRIN 28	Cytochrome P450 superfamily protein, CYP724B1, Brassinosteroid (BR) biosynthesis, Control of panicle architecture and seed size (Os04t0469800-01);Similar to OSIGBa0124N08.3 protein. (Os04t0469800-02)
Os04g0470150	69.4644	29.7425	1.2237	0.00065806	0.0238		Hypothetical conserved gene. (Os04t0470150-00)
Os04g0482600	522.656	365.925	0.51431	0.00073194	0.025544		Hypothetical conserved gene. (Os04t0482600-01)
Os04g0485300	1402.4	2137.63	-0.60812	4.2381e-07	6.1387e-05	d-glucose 6-phosphate dehydrogenase 2, Glucose-6-phosphate dehydrogenase 1, cytosolic G6PDH	Glucose-6-phosphate dehydrogenase. (Os04t0485300-01);Glucose-6-phosphate dehydrogenase. (Os04t0485300-02);Similar to Glucose-6-phosphate 1-dehydrogenase. (Os04t0485300-03);Similar to Glucose-6-phosphate 1-dehydrogenase. (Os04t0485300-04)
Os04g0493000	98.0442	175.613	-0.8409	0.00023323	0.010723	B-box-containing protein 11	Similar to H0425E08.14 protein. (Os04t0493000-01)
Os04g0495400	2855.31	4133.06	-0.53356	3.025e-06	0.00032235		DOMON domain containing protein. (Os04t0495400-01)
Os04g0497600	2324.2	3018.39	-0.37704	0.0011282	0.035214		Lupus La protein family protein. (Os04t0497600-01);Non-protein coding transcript. (Os04t0497600-02)
Os04g0498600	176.488	330.508	-0.90511	0.00021502	0.010087	S-ADENOSYLMETHIONINE DECARBOXYLASE	S-adenosylmethionine decarboxylase, Polyamine biosynthesis, Salt and drought stresses, Abiotic stress (Os04t0498600-01);Similar to cDNA clone:J013002M21, full insert sequence. (Os04t0498600-02)
Os04g0498900	235.552	64.9316	1.8591	9.03e-16	5.8573e-13		Similar to N-acetyltransferase ESCO1. (Os04t0498900-01)
Os04g0508300	1288.74	962.938	0.42045	0.00084899	0.028819	GLUTAREDOXIN	Glutaredoxin. (Os04t0508300-01)
Os04g0518400	92.1217	18.6702	2.3028	0.001365	0.040606	Phenylalanine ammonia-lyase 07	Similar to Phenylalanine ammonia-lyase (Fragment). (Os04t0518400-01)
Os04g0519700	349.413	203.333	0.78109	0.00027357	0.012147	AUXIN RESPONSE FACTOR 10	Similar to Auxin response factor 10. (Os04t0519700-01)
Os04g0533300	659.89	1305.57	-0.98438	0.00013955	0.007318	REMORIN 1.5	Similar to Remorin (pp34). (Os04t0533300-01);Similar to remorin. (Os04t0533300-02)
Os04g0534200	87.1269	19.8001	2.1376	0.00051779	0.019782		Protein kinase, core domain containing protein. (Os04t0534200-01)
Os04g0537800	40.5955	9.12876	2.1528	3.9851e-05	0.0026963		Protein of unknown function DUF26 domain containing protein. (Os04t0537800-01)
Os04g0541100	664.377	970.224	-0.54631	5.4689e-05	0.0034942	a DNA binding protein. a transcriptional activator.	Similar to Gt-2. (Os04t0541100-01)
Os04g0543600	119.702	5.99962	4.3184	4.1727e-26	4.9802e-23	cationic amino acid transporter 5	Amino acid/polyamine transporter I family protein. (Os04t0543600-01)
Os04g0545100	144.326	273.482	-0.92212	4.0796e-06	0.00041975	OsSTA128	Engulfment and cell motility, ELM domain containing protein. (Os04t0545100-01)
Os04g0547900	350.889	785.485	-1.1626	0.00011962	0.0064658		Anti-sense to fibroblast growth factor protein GFG family protein. (Os04t0547900-01)
Os04g0550866	86.3151	38.4983	1.1648	0.00034767	0.014591		Hypothetical protein. (Os04t0550866-00)
Os04g0554500	169.646	760.019	-2.1635	0.00012107	0.006491	hybrid proline- or glycine-rich protein 6	Similar to RCc3 protein. (Os04t0554500-00)
Os04g0554600	21.1015	123.797	-2.5526	4.7256e-07	6.7144e-05	hybrid proline- or glycine-rich protein 7	Similar to RCc3 protein. (Os04t0554600-00)
Os04g0555300	147.207	66.4486	1.1475	7.4103e-06	0.00068455	Functioning in Cesium Over-transport 11	Similar to glycerol 3-phosphate permease. (Os04t0555300-01);Similar to Glycerol 3-phosphate permease. (Os04t0555300-02)
Os04g0561500	900.274	1380.74	-0.617	2.0806e-06	0.00023605	Prolyl Oligopeptidase 9, PROLYL OLIGOPEPTIDASE 9	Similar to Prolyl endopeptidase (EC 3.4.21.26) (Post-proline cleaving enzyme) (PE). (Os04t0561500-01);Similar to Prolyl endopeptidase (EC 3.4.21.26) (Post-proline cleaving enzyme) (PE). (Os04t0561500-02)
Os04g0572800	15.0025	1.32445	3.5017	0.00085498	0.028957		Similar to OSIGBa0147H17.4 protein. (Os04t0572800-00)
Os04g0574500	159.121	80.2359	0.98781	0.00048638	0.018812	GROWTH-REGULATING FACTOR 12	Similar to Growth-regulating factor 12. (Os04t0574500-01)
Os04g0585700	263.215	141.169	0.89882	0.00021956	0.010236		Protein of unknown function DUF581 family protein. (Os04t0585700-01)
Os04g0586100	907.203	566.703	0.67883	3.3912e-05	0.0024149		Protein of unknown function DUF581 family protein. (Os04t0586100-01)
Os04g0587400	20.7222	59.6462	-1.5253	0.00019338	0.009247	PURINE PERMEASE 6	Protein of unknown function DUF250 domain containing protein. (Os04t0587400-01)
Os04g0593400	84.6766	175.641	-1.0526	2.4647e-05	0.0018808		Similar to OSIGBa0142I02-OSIGBa0101B20.20 protein. (Os04t0593400-00)
Os04g0605900	2233.24	3173.33	-0.50686	0.00014544	0.0075342	RIBOSOMAL PROTEIN L7	Similar to 60S ribosomal protein L7-2. (Os04t0605900-01)
Os04g0606000	474.822	873.56	-0.87952	1.7757e-09	4.2386e-07		Transferase family protein. (Os04t0606000-01)
Os04g0610400	355.501	187.513	0.92286	0.00015093	0.0077112	ETHYLENE RESPONSE FACTOR 77	APETALA-2-like transcription Factor, Control of the abscisic acid (ABA)/gibberellin (GA) balance (Os04t0610400-01)
Os04g0613400	358.373	592.743	-0.72595	2.0352e-06	0.00023288		Similar to Cell differentiation protein rcd1. (Os04t0613400-00)
Os04g0614600	620.183	897.138	-0.53264	0.0015021	0.043984	aminotransferase, pyruvate-dependent GABA transaminase	Similar to Viroid RNA-binding protein (Fragment). (Os04t0614600-01);Similar to OSIGBa0126B18.7 protein. (Os04t0614600-02)
Os04g0615200	376.167	98.2817	1.9364	1.176e-07	1.9824e-05		Hypothetical protein. (Os04t0615200-01)
Os04g0623500	1479.82	2238.8	-0.59731	6.1131e-06	0.00058463	GLYCOLATE OXIDASE 3	Similar to H0215F08.7 protein. (Os04t0623500-01);Similar to Peroxisomal (S)-2-hydroxy-acid oxidase GLO3. (Os04t0623500-02)
Os04g0623800	1394.88	2034.62	-0.54461	0.001643	0.046902	aminomethyltransferase	Similar to Aminomethyltransferase, mitochondrial precursor (EC 2.1.2.10) (Glycine cleavage system T protein) (GCVT). (Os04t0623800-01);Similar to H0215F08.10 protein. (Os04t0623800-02)
Os04g0639000	198.939	108.899	0.86934	9.284e-05	0.0052465		Conserved hypothetical protein. (Os04t0639000-01)
Os04g0641700	388.906	725.71	-0.89997	1.4425e-09	3.4711e-07	INCREASED LEAF INCLINATION 1	Similar to H0423H10.4 protein. (Os04t0641700-00)
Os04g0648900	244.058	380.462	-0.64053	0.00019222	0.0092208	ETHYLENE RESPONSE FACTOR 8	Similar to Dehydration responsive element binding protein 2F (DREB2F protein). (Os04t0648900-01);Similar to Dehydration responsive element binding protein 2F (DREB2F protein). (Os04t0648900-02)
Os04g0652700	1605.57	2112.34	-0.39575	0.00091895	0.030602		Similar to Nuclease PA3. (Os04t0652700-01);Similar to nuclease PA3. (Os04t0652700-02)
Os04g0654600	115.339	210.703	-0.86933	5.981e-05	0.003765	RECEPTOR-LIKE CYTOPLASMIC KINASE 167	Protein kinase, core domain containing protein. (Os04t0654600-01)
Os04g0673300	88.6184	237.5	-1.4223	0.0012227	0.037342	A-TYPE RESPONSE REGULATOR 6	A-type response regulator, Cytokinin signaling (Os04t0673300-01)
Os04g0676400	808.012	541.129	0.5784	0.00038937	0.015744		Similar to H0101F08.4 protein. (Os04t0676400-01)
Os04g0678200	26.7176	6.44936	2.0506	0.0013115	0.03937		Protein of unknown function DUF1218 family protein. (Os04t0678200-01)
Os04g0684900	103.578	40.0917	1.3693	9.0432e-06	0.00079596	CCR4-associated factor 1B, carbon cataboliterepressor 4-associated factor 1B, CCR4-associated factor 1-5	Component of the CCR4-NOTcomplex, Deadenylase, Deadenylation (poly(A) tail shortening), Development and stress response (Os04t0684900-01);Component of the CCR4-NOTcomplex, Deadenylase, Component of the plant P-body, Deadenylation (poly(A) tail shortening), Development and stress response (Os04t0684900-02)
Os04g0685300	1823.15	2420.66	-0.40897	0.00058741	0.021746		Harpin-induced 1 domain containing protein. (Os04t0685300-02)
Os04g0686300	346.346	209.442	0.72566	0.00037614	0.015459		Protein of unknown function DUF167 family protein. (Os04t0686300-01)
Os04g0690100	2718.2	1973.42	0.46196	7.0112e-05	0.0042263		Zinc finger, C2H2-type domain containing protein. (Os04t0690100-01);Similar to H0814G11.16 protein. (Os04t0690100-02)
Os04g0691800	43.9127	14.2682	1.6218	0.00054196	0.020418		C2 domain containing protein. (Os04t0691800-01)
Os05g0100100	465.137	157.412	1.5631	9.8305e-10	2.4443e-07		Similar to cDNA clone:006-204-G09, full insert sequence. (Os05t0100100-01)
Os05g0103400	29.3826	3.31293	3.1488	8.1453e-06	0.00073364		Protein of unknown function DUF3339 domain containing protein. (Os05t0103400-01)
Os05g0103800	168.356	308.49	-0.8737	8.6661e-05	0.0049822		Conserved hypothetical protein. (Os05t0103800-00)
Os05g0115800	481.34	672.407	-0.48228	0.00088004	0.029504	MITOGEN-ACTIVATED PROTEIN KINASE PHOSPHATASE 1	Similar to MAP kinase phosphatase (Fragment). (Os05t0115800-01);Similar to MAP kinase phosphatase. (Os05t0115800-02)
Os05g0119850	638.248	1030.47	-0.69112	0.0012281	0.037467		Hypothetical protein. (Os05t0119850-00)
Os05g0134400	1692.52	640.808	1.4012	4.9052e-12	1.9008e-09	class III peroxidase 65	Haem peroxidase, plant/fungal/bacterial family protein. (Os05t0134400-01);Similar to peroxidase 1. (Os05t0134400-02)
Os05g0137400	378.128	250.34	0.59498	0.00051924	0.019812	Aspartic acid protease 1, aspartic proteinase	Similar to Aspartic protease precursor. (Os05t0137400-01)
Os05g0138300	584.436	162.46	1.847	1.9755e-05	0.0015553	low temperature-induced low molecular weight integral membrane protein LTI6b, low temperature induced gene 6b, low temperature and salt responsive protein LTI6B, rare cold-inducible 2-6	Similar to ICT protein (Fragment). (Os05t0138300-01);Similar to ICT protein (Fragment). (Os05t0138300-03)
Os05g0153000	363.925	180.388	1.0125	2.2312e-08	4.2952e-06	VILLIN1, VILLIN 1	Gelsolin family protein. (Os05t0153000-01);Gelsolin family protein. (Os05t0153000-02)
Os05g0155601	2415.79	3806.48	-0.65596	0.0013299	0.039788		Importin alpha-1b subunit. (Os05t0155601-00)
Os05g0156401	480.66	840.965	-0.80703	0.00014048	0.007354		Hypothetical gene. (Os05t0156401-00)
Os05g0160300	14.3071	0	Inf	0.00087244	0.029348	non-specific lipid transfer protein d8, lipid transfer protein d8, type D non-specific lipid transfer protein 8, Protease inhibitor	Bifunctional inhibitor/plant lipid transfer protein/seed storage domain containing protein. (Os05t0160300-01)
Os05g0160600	323.271	507.558	-0.65083	3.6876e-05	0.0025529		Peptidase cysteine/serine, trypsin-like domain containing protein. (Os05t0160600-01)
Os05g0171900	26.7277	84.6543	-1.6632	1.3388e-06	0.00016748	GLYOXALASE I-6	Glyoxalase/bleomycin resistance protein/dioxygenase domain containing protein. (Os05t0171900-01);Similar to Lactoylglutathione lyase. (Os05t0171900-02)
Os05g0177100	126.941	238.106	-0.90745	1.2605e-05	0.0010715		F-box domain, cyclin-like domain containing protein. (Os05t0177100-01)
Os05g0186300	50.1463	8.04185	2.6405	1.7255e-07	2.768e-05	cytosolic NADP malic enzyme 2	Similar to NADP-malic enzyme. (Os05t0186300-01);Non-protein coding transcript. (Os05t0186300-03)
Os05g0194900	37.5448	9.08595	2.0469	0.00015371	0.0078002	Pyrophosphate-dependent phosphofructo-1-kinase, phosphofructokinase 4	Similar to Pyrophosphate-fructose-6-phosphate 1-phosphotransferase-like protein (Pyrophosphate-dependent phosphofructo-1-kinase-like protein). (Os05t0194900-01)
Os05g0199100	1893.38	2641.11	-0.48019	4.7843e-05	0.0030966		Similar to NDR1/HIN1-Like protein 2. (Os05t0199100-01)
Os05g0202500	7.70108	46.9471	-2.6079	5.5383e-07	7.6861e-05		Conserved hypothetical protein. (Os05t0202500-01)
Os05g0204900	693.618	1148.66	-0.72774	1.1558e-05	0.00098815	Protein phosphatase 74	Similar to Type 5 protein serine/threonine phosphatase 62 kDa isoform. (Os05t0204900-01);Similar to serine/threonine-protein phosphatase 5. (Os05t0204900-02)
Os05g0206800	585.457	868.3	-0.56863	3.6187e-05	0.0025198		Hypothetical protein. (Os05t0206800-00)
Os05g0207500	264.804	162.196	0.70718	0.00033878	0.014318	GSK3/SHAGGY-Like Kinase 2, GSK3/SHAGGY-LIKE KINASE2	GSK3/SHAGGY-like kinase, Brassinosteroid signaling (Os05t0207500-01)
Os05g0212300	21.735	2.06044	3.399	5.1914e-05	0.0033343	glycoside hydrolase OsGH9C4	Similar to Endo-beta-1,4-glucanase precursor (EC 3.2.1.4). (Os05t0212300-01)
Os05g0217000	923.052	1246.63	-0.43355	0.00081507	0.027917	ARABINOGALACTAN PROTEIN 23	Protein of unknown function DUF1070 family protein. (Os05t0217000-01)
Os05g0218400	257.759	724.238	-1.4904	1.0073e-09	2.4644e-07	RECEPTOR-LIKE CYTOPLASMIC KINASE 181	Similar to Somatic embryogenesis receptor kinase-like protein. (Os05t0218400-01)
Os05g0227700	6066.84	7700.24	-0.34396	0.0017481	0.048759	EUKARYOTIC INITIATION FACTOR 3L	Similar to Eukaryotic translation initiation factor 3 subunit 6-interacting protein. (Os05t0227700-01);Similar to Eukaryotic translation initiation factor 3 subunit 6-interacting protein. (Os05t0227700-02);Similar to Eukaryotic translation initiation factor 3 subunit 6-interacting protein. (Os05t0227700-03)
Os05g0230700	2608.57	1991.48	0.38942	0.0011095	0.034958	IAA17	Similar to Auxin-responsive protein IAA17. (Os05t0230700-01);Similar to Auxin-responsive protein IAA17. (Os05t0230700-02);Similar to Auxin-responsive protein IAA17. (Os05t0230700-03)
Os05g0278500	22.0906	4.25595	2.3759	0.0014518	0.042762	ACYLTRANSFERASE 5	Transferase family protein. (Os05t0278500-01)
Os05g0304600	59.8469	130.934	-1.1295	2.3196e-05	0.0017884	LIPOXYGENASE 7	Similar to Lipoxygenase (Fragment). (Os05t0304600-01);Similar to Lipoxygenase. (Os05t0304600-02)
Os05g0324700	38.6125	5.73886	2.7502	2.8081e-05	0.002073		Conserved hypothetical protein. (Os05t0324700-01)
Os05g0344200	343.217	836.247	-1.2848	2.273e-07	3.5323e-05		Conserved hypothetical protein. (Os05t0344200-01)
Os05g0347400	154.458	84.9938	0.86178	0.00035845	0.014875	G1 LIKE PROTEIN 9	Protein of unknown function DUF640 domain containing protein. (Os05t0347400-01)
Os05g0350500	7314.27	9357.7	-0.35544	0.0016654	0.047326		Peptidase M24, structural domain domain containing protein. (Os05t0350500-01)
Os05g0358500	133.56	246.041	-0.88142	0.00013735	0.0072534	protein phosphatase 2C48, protein phosphatase 2C 48, protein phosphatase 75	Protein phosphatase 2C domain containing protein. (Os05t0358500-01);Protein phosphatase 2C domain containing protein. (Os05t0358500-02)
Os05g0366000	7.21078	45.4839	-2.6571	5.0771e-07	7.1458e-05	BETA-GLUCOSIDASE 21	Beta-glucosidase 21. (Os05t0366000-00)
Os05g0370300	104.303	33.4636	1.6401	3.0011e-06	0.00032096		Similar to src2-like protein. (Os05t0370300-00)
Os05g0374000	3.9414	27.4981	-2.8026	4.9864e-05	0.0032135		Hypothetical protein. (Os05t0374000-01)
Os05g0396900	566.812	804.165	-0.50462	0.00028681	0.012622		Conserved hypothetical protein. (Os05t0396900-01)
Os05g0397300	471.943	776.548	-0.71846	0.00053556	0.020279		Conserved hypothetical protein. (Os05t0397300-02);Hypothetical conserved gene. (Os05t0397300-03)
Os05g0397900	1208	1583.72	-0.3907	0.0015633	0.045286	KIN14J	Kinesin, motor region domain containing protein. (Os05t0397900-01)
Os05g0402700	28310.6	40464.6	-0.51532	1.4149e-05	0.0011793	fructose-diphosphate aldolase, aldolase isozyme C-2, aldolase C-2, cytoplasmic aldolase C-2	Similar to Fructose-bisphosphate aldolase, cytoplasmic isozyme (EC 4.1.2.13). (Os05t0402700-01)
Os05g0403300	712.408	1678.81	-1.2367	6.9462e-15	4.064e-12		Peptidase A1 domain containing protein. (Os05t0403300-01)
Os05g0408300	421.221	739.475	-0.81192	1.8912e-08	3.7124e-06		Similar to Lipase. (Os05t0408300-01)
Os05g0408900	299.23	458.159	-0.6146	0.00012017	0.0064751	1-DEOXY-D-XYLULOSE 5-PHOSPHATE SYNTHASE 1	Similar to 1-deoxy-D-xylulose-5-phosphate synthase. (Os05t0408900-01);Similar to 1-deoxy-D-xylulose-5-phosphate synthase. (Os05t0408900-02);Similar to 1-D-deoxyxylulose 5-phosphate synthase. (Os05t0408900-03);Similar to 1-D-deoxyxylulose 5-phosphate synthase. (Os05t0408900-04)
Os05g0412000	356.849	582.924	-0.70799	8.7556e-05	0.005024		Similar to Homeodomain-related. (Os05t0412000-00)
Os05g0414600	591.061	886.592	-0.58496	0.00023574	0.010821		Conserved hypothetical protein. (Os05t0414600-01)
Os05g0424000	75.7822	35.992	1.0742	0.0015245	0.044466	amino acid permease 11F, amino acid permease 7, amino acid/auxin permease 7	Amino acid permease, Transport of amino acids (Os05t0424000-01)
Os05g0427900	5.21551	26.5173	-2.3461	0.00043821	0.017341		Similar to DnaJ-like protein. (Os05t0427900-01)
Os05g0446550	105.796	57.0496	0.891	0.0016736	0.047514	REPRESSOR OF SILENCING 1d	Similar to DNA glycosylase/lyase 701. (Os05t0446550-00)
Os05g0451100	56.1733	110.697	-0.97867	0.0011944	0.03659	PHOSPHATE TRANSPORTER 23	Major facilitator superfamily protein. (Os05t0451100-01)
Os05g0453300	236.989	149.98	0.66005	0.0015928	0.045938		Conserved hypothetical protein. (Os05t0453300-01)
Os05g0459700	543.504	803.823	-0.56459	7.1575e-05	0.0042885	FASCICLIN-LIKE ARABINOGALACTAN PROTEIN 26	Similar to Fasciclin-like protein FLA22. (Os05t0459700-01)
Os05g0461600	406.226	847.14	-1.0603	3.6357e-05	0.0025228		Similar to SIK1 protein (Nucleolar protein NOP56). (Os05t0461600-01)
Os05g0462500	980.123	1293.66	-0.40043	0.0015097	0.044162		Transmembrane receptor, eukaryota domain containing protein. (Os05t0462500-01)
Os05g0473500	762.701	1047.52	-0.45779	0.00058162	0.021639	EXOCYST SUBUNIT EXO70 FAMILY PROTEIN B3	Exo70 exocyst complex subunit family protein. (Os05t0473500-01);Similar to protein binding protein. (Os05t0473500-02)
Os05g0474800	59.7027	24.2615	1.2991	0.0017351	0.048733	WRKY GENE 70	WRKY transcription factor 70. (Os05t0474800-01)
Os05g0477600	111.956	187.218	-0.74179	0.00077452	0.026748	ALPHA-EXPANSIN 4	Alpha-expansin OsEXPA4. (Os05t0477600-01);Non-protein coding transcript. (Os05t0477600-02)
Os05g0478250	24.6088	64.9642	-1.4005	0.00020806	0.0098231		Hypothetical protein. (Os05t0478250-00)
Os05g0480400	1094.61	1593.77	-0.54203	1.2791e-05	0.0010843		Serine/threonine protein kinase domain containing protein. (Os05t0480400-01)
Os05g0493100	55.7733	12.4925	2.1585	0.00018482	0.0089234		Similar to KI domain interacting kinase 1. (Os05t0493100-01)
Os05g0493800	32.0694	1.56562	4.3564	0.00057295	0.021389		Similar to nodulin-like protein. (Os05t0493800-01)
Os05g0494200	346.565	117.511	1.5603	2.1156e-07	3.34e-05	ORYZACYSTATIN 2	Similar to Cystatin (Fragment). (Os05t0494200-01);Similar to Cysteine proteinase inhibitor-II (Oryzacystatin-II). (Os05t0494200-02)
Os05g0495900	55.1367	11.7456	2.2309	1.8557e-06	0.00021545	beta-1, 3-glucanase 8	Similar to Beta-1,3-glucanase precursor (Fragment). (Os05t0495900-01)
Os05g0496400	63.8138	124.91	-0.96894	0.00030404	0.013263	Metacaspase 4	Peptidase C14, caspase catalytic domain containing protein. (Os05t0496400-00)
Os05g0497200	155.318	59.7825	1.3774	8.9214e-06	0.0007899	ETHYLENE RESPONSE FACTOR 130	AP2/ERF (APETALA2/ethylene-responsive factor) protein, Regulation of spikelet meristem determinancy and floral organ identity (Os05t0497200-01)
Os05g0499300	7619.32	12127.7	-0.67057	7.7482e-05	0.0045871	PEROXIDASE 1	Similar to Peroxidase (EC 1.11.1.7). (Os05t0499300-01)
Os05g0500200	1412.96	2337.71	-0.72637	1.8789e-09	4.4495e-07		Similar to UDP glucosyltransferase-1. (Os05t0500200-01)
Os05g0501001	74.7925	27.0463	1.4675	4.0566e-05	0.0027139		Hypothetical gene. (Os05t0501001-01)
Os05g0503500	903.261	1436.89	-0.66973	0.0010082	0.032617	-	-
Os05g0503650	195.56	418.076	-1.0962	2.3839e-10	6.5256e-08	-	-
Os05g0513800	362.729	236.703	0.61581	0.0011223	0.035162	RAC/ROP-TYPE GTPASE 2	Small GTP-binding protein OsRac2. (Os05t0513800-01);Similar to Rac-like GTP-binding protein 2. (Os05t0513800-02)
Os05g0517200	665.627	928.188	-0.4797	0.0003801	0.015589	TREHALOSE-6-PHOSPHATE SYNTHASE 6	HAD-superfamily hydrolase subfamily IIB protein. (Os05t0517200-01)
Os05g0517900	422.483	733.947	-0.79678	0.00092071	0.030627		2 , 3 cyclic phosphodiesterase, plant domain containing protein. (Os05t0517900-01)
Os05g0519000	315.18	157.231	1.0033	1.3061e-07	2.1532e-05	VQ motif-containing protein 21	VQ domain containing protein. (Os05t0519000-00)
Os05g0524100	88.639	162.543	-0.87481	0.00024565	0.011173		Conserved hypothetical protein. (Os05t0524100-01)
Os05g0539800	1825.47	1303.24	0.48616	7.8217e-05	0.0046214	Reversion-To-ethylene Sensitivity1 homologue 2	Protein of unknown function DUF778 family protein. (Os05t0539800-01);Protein of unknown function DUF778 family protein. (Os05t0539800-02)
Os05g0542100	2788.43	1879.33	0.56924	0.00018457	0.0089234		Similar to Fiber protein Fb11. (Os05t0542100-01)
Os05g0545000	143.796	38.0006	1.9199	3.738e-05	0.0025699	Sec14-nodulin domain-containing protein 6, Sec14-nodulin domain protein 6	Similar to Phosphatidylinositol transfer-like protein IV. (Os05t0545000-01);Similar to Phosphatidylinositol transfer-like protein III. (Os05t0545000-02)
Os05g0549700	1837.8	2536.04	-0.4646	0.00017266	0.0085435		Similar to Threonine synthase, chloroplast precursor (EC 4.2.3.1) (TS). (Os05t0549700-01);Similar to Threonine synthase, chloroplast precursor (EC 4.2.3.1) (TS). (Os05t0549700-02)
Os05g0550300	99.6995	43.0885	1.2103	0.0015149	0.044268	non-specific lipid transfer protein 2.4, lipid transfer protein 2.4, type 2 non-specific lipid transfer protein 4	Similar to Lipid transfer protein (Fragment). (Os05t0550300-01)
Os05g0551000	113.433	207.029	-0.868	6.3758e-05	0.0039386	RING finger protein OsRFPH2-24, RING-H2 protein 24, Haemerythrin motif-containing Really Interesting New Gene (RING)-and Zinc-finger protein 2, Haemerythrin motif-containing RING- and Zinc-finger protein 2	Zinc finger, RING-type domain containing protein. (Os05t0551000-01)
Os05g0554601	114.803	56.0091	1.0354	0.00021777	0.010169		Conserved hypothetical protein. (Os05t0554601-00)
Os05g0557100	548.362	940.827	-0.7788	7.9981e-08	1.4038e-05		Peptidase A1 domain containing protein. (Os05t0557100-01)
Os05g0563550	2763.53	4679.25	-0.75977	2.8723e-11	9.4181e-09	FASCICLIN-LIKE ARABINOGALACTAN PROTEIN 18	FAS1 domain domain containing protein. (Os05t0563550-00)
Os05g0564800	127.385	68.3541	0.8981	0.00079176	0.02728		Similar to 60S ribosomal protein L18A. (Os05t0564800-01)
Os05g0565100	79.6862	25.3912	1.65	4.688e-06	0.00047578		Cytochrome b561/ferric reductase transmembrane domain containing protein. (Os05t0565100-01)
Os05g0566400	286.204	437.065	-0.61081	0.00021474	0.010087	MITOGEN-ACTIVATED PROTEIN KINASE 7	Similar to Blast and wounding induced mitogen-activated protein kinase. (Os05t0566400-01)
Os05g0568000	2648.71	3454.26	-0.38309	0.00087713	0.029473	KCS1, OsKCS1	Similar to FAE1. (Os05t0568000-02)
Os05g0571000	412.406	667.426	-0.69454	2.4036e-06	0.00026861	SPA1-like	WD40 repeat-like domain containing protein. (Os05t0571000-01);Similar to SPA1 (SUPPRESSOR OF PHYA-105 1); protein binding / signal transducer. (Os05t0571000-02)
Os05g0573300	128.168	68.1586	0.91107	0.00066426	0.023995		Similar to CTP synthase 1 (EC 6.3.4.2) (UTP--ammonia ligase 1) (CTP synthetase 1). (Os05t0573300-01)
Os05g0579600	6.58296	50.7019	-2.9452	5.3828e-05	0.0034466		Homeodomain-like containing protein. (Os05t0579600-01)
Os05g0580200	36.8957	0	Inf	7.4344e-11	2.2869e-08		Conserved hypothetical protein. (Os05t0580200-01)
Os05g0582000	23.7587	56.923	-1.2606	0.0016442	0.046902		Plant Basic Secretory Protein domain containing protein. (Os05t0582000-01)
Os05g0586400	344.068	559.102	-0.70042	9.2069e-05	0.0052128		Protein of unknown function DUF3133 domain containing protein. (Os05t0586400-01)
Os05g0588300	213.294	95.6648	1.1568	0.00010191	0.0056626		Serine/threonine protein kinase-related domain containing protein. (Os05t0588300-01)
Os05g0589700	107.789	56.5649	0.93023	0.00095187	0.031177	RECEPTOR-LIKE CYTOPLASMIC KINASE 191	Similar to cDNA, clone: J090072P03, full insert sequence. (Os05t0589700-01)
Os06g0108600	21.9916	3.30929	2.7324	0.00047526	0.018513	ALPHA-EXPANSIN 17	Similar to Expansin-A17. (Os06t0108600-00)
Os06g0109100	253.571	430.123	-0.76236	0.00050233	0.019266		Hypothetical conserved gene. (Os06t0109100-00)
Os06g0115500	5327.76	7545.74	-0.50213	0.00031285	0.013496		Similar to 60S ribosomal protein L13 (BBC1 protein homolog). (Os06t0115500-01)
Os06g0127800	3018.25	4024.45	-0.41508	0.00032759	0.013964	DWARF AND LOW-TILLERING	GAI-RGA-SCR (GRAS) family protein, Brassinosteroid signaling (Os06t0127800-01)
Os06g0139800	123.955	59.2997	1.0637	8.9528e-05	0.0050883		Similar to Acid phosphatase (EC 3.1.3.2) 1 allozyme 1. (Os06t0139800-01)
Os06g0143100	128.014	52.4644	1.2869	3.2825e-06	0.00034366	CADMIUM TOLERANT 2	Similar to Cadmium tolerant 1. (Os06t0143100-01);Similar to Cadmium tolerant 1. (Os06t0143100-02)
Os06g0143400	452.579	767.953	-0.76285	1.2644e-07	2.096e-05	FATB1, OsFATB1	Similar to Acyl-ACP thioesterase (Fragment). (Os06t0143400-01)
Os06g0156600	186.279	61.968	1.5879	0.00076497	0.02651	GDSL ESTERASE/LIPASE PROTEIN 77	Lipase, GDSL domain containing protein. (Os06t0156600-01)
Os06g0159600	232.391	68.4119	1.7642	1.8121e-05	0.0014457	plant U-box-containing protein 64, U-box protein 64	Tetratricopeptide-like helical domain containing protein. (Os06t0159600-01);Hypothetical conserved gene. (Os06t0159600-02)
Os06g0166500	1028.96	406.13	1.3412	0.00095418	0.031218	IAA20	Similar to Auxin-responsive protein IAA20 (Indoleacetic acid-induced protein 20). (Os06t0166500-01)
Os06g0172200	400.518	696.829	-0.79894	5.6824e-08	1.0214e-05	CALMODULIN-LIKE PROTEIN 30	EF-Hand type domain containing protein. (Os06t0172200-02)
Os06g0191300	699.902	954.664	-0.44784	0.00096972	0.031692	MITOGEN-ACTIVATED PROTEIN KINASE KINASE 5	Similar to Mitogen-activated protein kinase kinase 4 (Fragment). (Os06t0191300-01);Similar to Mitogen-activated protein kinase kinase 4 (Fragment). (Os06t0191300-02)
Os06g0193200	279.564	501.631	-0.84345	1.9349e-07	3.0873e-05	PECTIN METHYLESTERASE 19	Similar to Pectin methylesterase 8 (Fragment). (Os06t0193200-01)
Os06g0194900	179.14	89.4652	1.0017	0.00071082	0.02501	SUCROSE SYNTHASE 2	Sucrose synthase 2 (EC 2.4.1.13). (Os06t0194900-01);Sucrose synthase 2 (EC 2.4.1.13). (Os06t0194900-02);Sucrose synthase 2 (EC 2.4.1.13). (Os06t0194900-03);Similar to Sucrose synthase 2. (Os06t0194900-04)
Os06g0196900	902.997	1606.71	-0.83131	3.8546e-07	5.6938e-05		Similar to Chaperonin. (Os06t0196900-01);Similar to 20 kDa chaperonin, chloroplast precursor (Protein Cpn21) (Chloroplast protein Cpn10) (Chloroplast chaperonin 10) (Ch-CPN10) (Chaperonin 20). (Os06t0196900-02);Similar to Chaperonin. (Os06t0196900-03)
Os06g0200600	35.3886	7.43745	2.2504	7.4516e-05	0.0044468	-	-
Os06g0200700	15.638	1.67901	3.2194	0.0011028	0.03482		Hypothetical protein. (Os06t0200700-01)
Os06g0216700	13.4124	1.05276	3.6713	0.0011915	0.03654	stellacyanin-like protein 3	Cupredoxin domain containing protein. (Os06t0216700-01)
Os06g0220600	104.048	200.812	-0.94859	7.9212e-05	0.0046526		RNA recognition motif domain domain containing protein. (Os06t0220600-01)
Os06g0223800	2228.9	3222.62	-0.5319	3.5724e-05	0.0025022		C2 calcium-dependent membrane targeting domain containing protein. (Os06t0223800-01)
Os06g0227250	752.014	1102.82	-0.55236	0.00030168	0.013199		Hypothetical conserved gene. (Os06t0227250-00)
Os06g0228500	62.7212	5.2527	3.5778	4.813e-08	8.7567e-06	amino acid transporter-like 12	Amino acid transporter, transmembrane domain containing protein. (Os06t0228500-01)
Os06g0231050	156.28	80.3358	0.96002	0.00034245	0.014412		Uncharacterised protein family UPF0497, trans-membrane plant subgroup domain containing protein. (Os06t0231050-00)
Os06g0234700	13.6648	0	Inf	2.2568e-05	0.0017491	-	-
Os06g0237300	811.4	1252.92	-0.62681	1.5699e-06	0.00018815		Similar to LIM domain protein WLIM-1. (Os06t0237300-01)
Os06g0250600	165.331	261.474	-0.66131	0.00069675	0.024779		Ankyrin domain containing protein. (Os06t0250600-01)
Os06g0285400	1131.99	1594.19	-0.49395	7.8713e-05	0.0046324		Similar to Serine/threonine-specific kinase like protein. (Os06t0285400-01);Similar to predicted protein. (Os06t0285400-02)
Os06g0303800	50.0305	14.0219	1.8351	0.00029352	0.012861		Conserved hypothetical protein. (Os06t0303800-01)
Os06g0304600	49.9174	6.79299	2.8774	2.977e-08	5.5866e-06		Peptidase aspartic, catalytic domain containing protein. (Os06t0304600-01);Similar to Aspartic proteinase nepenthesin-2. (Os06t0304600-02)
Os06g0327400	82.9748	23.3955	1.8264	3.9803e-07	5.8505e-05		Conserved hypothetical protein. (Os06t0327400-00)
Os06g0331900	129.994	392.893	-1.5957	0.0002626	0.011783		Uncharacterised protein family UPF0005 domain containing protein. (Os06t0331900-01)
Os06g0496000	3050.84	4039.64	-0.40502	0.00038036	0.015589		Like-Sm ribonucleoprotein (LSM)-related domain domain containing protein. (Os06t0496000-01)
Os06g0500300	51.433	3.35073	3.9401	2.1753e-11	7.3757e-09		Conserved hypothetical protein. (Os06t0500300-00)
Os06g0501900	44.4207	5.73157	2.9542	1.1226e-07	1.9032e-05	P-450 76M9	Cytochrome P450 family protein. (Os06t0501900-01)
Os06g0508800	777.835	541.174	0.52337	0.00019298	0.0092427		Conserved hypothetical protein. (Os06t0508800-01)
Os06g0513943	211.739	908.33	-2.1009	5.2492e-06	0.00052208	Thionin 6	Conserved hypothetical protein. (Os06t0513943-01)
Os06g0514100	0.316386	77.2313	-7.9314	5.8609e-06	0.00056779	thionin 7	Conserved hypothetical protein. (Os06t0514100-01)
Os06g0515400	14.6126	46.9306	-1.6833	0.00032503	0.013874		Hypothetical protein. (Os06t0515400-01)
Os06g0524400	119.206	194.734	-0.70805	0.0012437	0.037827	trichome birefringence-like 49, trichome birefringence-like 50	Protein of unknown function DUF231, plant domain containing protein. (Os06t0524400-01)
Os06g0536850	75.7868	34.2642	1.1452	0.00083178	0.028364	-	-
Os06g0546500	144.664	441.142	-1.6085	7.9143e-14	4.2936e-11	class III peroxidase 88	Similar to Class III peroxidase GvPx2b (Fragment). (Os06t0546500-01)
Os06g0573600	465.89	233.443	0.99692	8.3983e-08	1.4654e-05	BETA-GALACTOSIDASE 2	Similar to Beta-galactosidase precursor (EC 3.2.1.23) (Lactase). (Os06t0573600-01);Similar to Beta-galactosidase. (Os06t0573600-02);Similar to Beta-galactosidase. (Os06t0573600-03)
Os06g0593800	110.853	196.312	-0.82449	0.00015841	0.0079793		UDP-glucuronosyl/UDP-glucosyltransferase family protein. (Os06t0593800-01)
Os06g0604200	526.444	714.005	-0.43965	0.0017419	0.048759	PHOSPHOLIPASE D ALPHA 4	Chloroplast-localized phospholipase D, Herbivore defense (Os06t0604200-02)
Os06g0604300	1105.28	1792.12	-0.69725	1.836e-05	0.001457	PHOSPHOLIPASE D ALPHA 5	Chloroplast-localized phospholipase D, Herbivore defense (Os06t0604300-01)
Os06g0622700	1351.23	945.558	0.51504	5.9702e-05	0.003765	b-ZIP TRANSCRIPTION FACTOR 50	bZIP transcription factor, Endoplasmic reticulum stress response (Os06t0622700-01);Active form of bZIP transcription factor, Endoplasmic reticulum stress response (Os06t0622700-02)
Os06g0638500	613.053	1040.74	-0.76353	7.355e-05	0.004398		Tyrosine protein kinase domain containing protein. (Os06t0638500-00)
Os06g0646100	113.074	183.834	-0.70113	0.0017397	0.048759		Conserved hypothetical protein. (Os06t0646100-01)
Os06g0652600	1085.14	2240.76	-1.0461	6.1801e-09	1.3266e-06		Similar to Lustrin A. (Os06t0652600-01);Conserved hypothetical protein. (Os06t0652600-02)
Os06g0662200	130.826	336.554	-1.3632	3.2001e-07	4.8894e-05	RICE SEED B-ZIPPER 5	Basic leucine zipper (bZIP) transcription factor, Negative regulator of cold and drought stress response (Os06t0662200-01)
Os06g0664300	156.683	73.6194	1.0897	1.0605e-05	0.0009199		Similar to Vacuolar sorting receptor 6 precursor (AtVSR6) (Epidermal growth factor receptor-like protein 6) (AtELP6) (BP80-like protein d) (AtBP80d). (Os06t0664300-01)
Os06g0665500	210.493	324.541	-0.62463	0.00057473	0.021409	ALLANTOATE AMIDOHYDROLASE	Peptidase M20 domain containing protein. (Os06t0665500-01)
Os06g0671800	2376.68	3183.2	-0.42153	0.00084616	0.028756		Similar to patellin-5. (Os06t0671800-01)
Os06g0673800	86.5696	35.179	1.2991	0.0011	0.034804		Conserved hypothetical protein. (Os06t0673800-01)
Os06g0681400	7056.58	9374.65	-0.4098	0.00019916	0.0094927	Ubiquitin1, polyubiquitin	Ubiquitin domain containing protein. (Os06t0681400-01)
Os06g0682300	580.476	412.671	0.49224	0.0010704	0.03405		Conserved hypothetical protein. (Os06t0682300-01)
Os06g0696600	31.0858	2.43094	3.6767	3.7473e-07	5.5627e-05	XYLOGLUCAN ENDOTRANSGLUCOSYDASE/HYDROLASE 12	Similar to Xyloglucan endo-transglycosylase homolog. (Os06t0696600-01)
Os06g0697500	429.762	152.357	1.4961	8.476e-05	0.0049108		ATPase, AAA-type, core domain containing protein. (Os06t0697500-00)
Os06g0699700	362.03	237.139	0.61037	0.00042169	0.016776		Similar to Aminodeoxychorismate synthase/glutamine amidotransferase. (Os06t0699700-01)
Os06g0704450	58.8733	117.387	-0.99558	0.00035825	0.014875		Hypothetical protein. (Os06t0704450-00)
Os06g0707200	826.606	1185.38	-0.52007	7.1019e-05	0.0042637		Glycosyltransferase AER61, uncharacterized domain containing protein. (Os06t0707200-01)
Os06g0711900	120.913	273.346	-1.1768	0.00014963	0.0076976	GPI-anchored non-specific lipid transfer protein 24, type G nsLTP 24, type G non-specific lipid transfer protein 24	Bifunctional inhibitor/plant lipid transfer protein/seed storage domain containing protein. (Os06t0711900-01)
Os06g0713000	112.498	203.38	-0.85428	9.0159e-05	0.0051144	B-box-containing protein 22	Zinc finger, B-box domain containing protein. (Os06t0713000-01)
Os06g0725900	367.563	526.974	-0.51974	0.00071257	0.02501	FTSH1	Similar to Cell division protein ftsH homolog, chloroplast precursor (EC 3.4.24.-) (DS9). (Os06t0725900-01);Similar to cDNA clone:J013001F19, full insert sequence. (Os06t0725900-02)
Os07g0100800	105.72	16.5416	2.6761	2.1668e-05	0.0016837	proline transporter 3	Similar to Amino acid permease. (Os07t0100800-01)
Os07g0108200	275.324	444.427	-0.69081	2.3576e-05	0.0018126		Similar to transparent testa 12 protein. (Os07t0108200-00)
Os07g0109700	213.891	654.227	-1.6129	1.0801e-23	1.151e-20		Conserved hypothetical protein. (Os07t0109700-01)
Os07g0110000	1271.41	678.281	0.90647	7.1043e-12	2.5236e-09		Conserved hypothetical protein. (Os07t0110000-01);Hypothetical conserved gene. (Os07t0110000-02)
Os07g0112100	73.5644	220.546	-1.584	4.4969e-12	1.7655e-09		Similar to J023132I08, full insert sequence. (Os07t0112100-00)
Os07g0113600	0.988398	14.5472	-3.8795	0.00048231	0.018714	F-box protein 329	Hypothetical conserved gene. (Os07t0113600-00)
Os07g0115200	1204.84	0	Inf	3.5918e-244	1.0717e-239	OsSTA185	Conserved hypothetical protein. (Os07t0115200-01)
Os07g0122000	539.115	254.681	1.0819	4.5487e-07	6.4939e-05		Protein of unknown function DUF1719, Oryza sativa family protein. (Os07t0122000-01)
Os07g0143500	509.55	298.263	0.77264	1.0319e-06	0.00013272	-	-
Os07g0153150	638.88	0	Inf	2.1271e-160	3.1734e-156		Conserved hypothetical protein. (Os07t0153150-01);Conserved hypothetical protein. (Os07t0153150-02)
Os07g0158800	71.0303	150.671	-1.0849	1.5205e-05	0.0012429		Protein of unknown function DUF266, plant family protein. (Os07t0158800-01)
Os07g0164300	551.549	822.797	-0.57705	0.0014583	0.042912		Similar to syntaxin 132. (Os07t0164300-01)
Os07g0168300	877.369	618.909	0.50346	0.00022885	0.010587	TAU GLUTATHIONE S-TRANSFERASE 11	Similar to Glutathione S-transferase GSTU6. (Os07t0168300-01)
Os07g0180900	32044	40971.8	-0.35458	0.001097	0.034784		Similar to 60S ribosomal protein L4. (Os07t0180900-01)
Os07g0181000	1902.99	2529.61	-0.41064	0.00059456	0.021965		Similar to Pyruvate kinase isozyme A, chloroplast precursor (EC 2.7.1.40). (Os07t0181000-01);Similar to Pyruvate kinase. (Os07t0181000-02);Similar to Pyruvate kinase. (Os07t0181000-03);Similar to Pyruvate kinase. (Os07t0181000-04)
Os07g0181500	272.8	114.335	1.2546	7.293e-10	1.8922e-07		Protein of unknown function DUF506, plant family protein. (Os07t0181500-01)
Os07g0182200	243.728	155.061	0.65243	0.00099348	0.032291	basic helix-loop-helix protein 099	Similar to Phytochrome-interacting factor 3 (Phytochrome-associated protein 3) (Basic helix-loop-helix protein 8) (bHLH8) (AtbHLH008). (Os07t0182200-01)
Os07g0184800	1223.65	1997.99	-0.70736	6.8632e-07	9.1832e-05		Similar to Variant of histone H1. (Os07t0184800-01)
Os07g0185900	2998.35	2184.68	0.45675	0.00016439	0.0082302		Conserved hypothetical protein. (Os07t0185900-01)
Os07g0187900	35.1632	10.0936	1.8006	0.00085847	0.029009		Similar to nitrate and chloride transporter. (Os07t0187900-01)
Os07g0190800	212.119	41.1053	2.3675	1.4449e-08	2.8935e-06	THIOREDOXIN H-TYPE 5	Similar to Thioredoxin h. (Os07t0190800-01)
Os07g0192000	728.226	1344.82	-0.88496	0.00065475	0.023738		ATPase, AAA-type, core domain containing protein. (Os07t0192000-01)
Os07g0197100	229.606	442.144	-0.94536	2.0849e-08	4.0395e-06	HEXOKINASE-4	Similar to Hexokinase-4, chloroplastic. (Os07t0197100-01)
Os07g0198300	33.9482	8.85918	1.9381	0.00067228	0.024226	GPI-anchored non-specific lipid transfer protein 19, type G nsLTP 19, type G non-specific lipid transfer protein 19	Bifunctional inhibitor/plant lipid transfer protein/seed storage domain containing protein. (Os07t0198300-01)
Os07g0200900	64.0136	28.7203	1.1563	0.0018077	0.049988		Similar to Protein SHORT-ROOT 2. (Os07t0200900-01)
Os07g0207301	142.016	243.083	-0.7754	0.00010083	0.0056129		Hypothetical gene. (Os07t0207301-00)
Os07g0214900	4.5237	29.8964	-2.7244	0.00027657	0.012244	chalcone synthase 2, polyketide synthase 8	Similar to Chalcone synthase C2 (EC 2.3.1.74) (Naringenin-chalcone synthase C2). (Os07t0214900-00)
Os07g0229200	1.62612	16.827	-3.3713	0.0004719	0.01843	F-box protein 355	Cyclin-like F-box domain containing protein. (Os07t0229200-01)
Os07g0230600	20.8544	3.66385	2.5089	0.0012376	0.037681		Hypothetical conserved gene. (Os07t0230600-00)
Os07g0231900	106.927	43.8341	1.2865	3.9526e-05	0.0026865		PDZ/DHR/GLGF domain containing protein. (Os07t0231900-01)
Os07g0235800	1623.71	1228.21	0.40274	0.001183	0.036351	SUPERNUMERARY BRACT GENE	AP2 domain containing transcription factor, Control of inflorescence architecture, Floral meristem establishment (Os07t0235800-01)
Os07g0252400	3304.13	4939.73	-0.58016	0.00049183	0.018936	CELLULOSE SYNTHASE A6	Similar to Cellulose synthase-8. (Os07t0252400-01);Similar to Cellulose synthase BoCesA7. (Os07t0252400-02)
Os07g0255900	258.312	163.531	0.65955	0.00071331	0.02501	trichome birefringence-like 46, trichome birefringence-like 47	Domain of unknown function DUF231, plant domain containing protein. (Os07t0255900-00)
Os07g0258100	201.243	87.3821	1.2035	1.0189e-07	1.7372e-05		Conserved hypothetical protein. (Os07t0258100-01)
Os07g0264100	622.572	922.742	-0.56769	2.8988e-05	0.0021148		NAD(P)-binding domain containing protein. (Os07t0264100-01)
Os07g0437000	219.868	38.425	2.5165	0.00011509	0.0062666	YUCCA-LIKE GENE 6	Flavin monooxygenase-like enzyme , Auxin biosynthesis (Os07t0437000-01)
Os07g0440100	13.6035	1.04912	3.6967	0.00094529	0.031132		Conserved hypothetical protein. (Os07t0440100-00)
Os07g0442800	221.263	1.05276	7.7154	2.0001e-62	8.5257e-59		Conserved hypothetical protein. (Os07t0442800-01)
Os07g0448800	7831.34	12107.2	-0.62853	8.0878e-05	0.0047411	PLASMA MEMBRANE INTRINSIC PROTEIN 2A	Aquaporin. (Os07t0448800-01);Non-protein coding transcript. (Os07t0448800-02)
Os07g0461900	212.238	129.192	0.71617	0.00062834	0.02292		Similar to Acetylornithine aminotransferase, mitochondrial precursor (EC 2.6.1.11) (ACOAT) (Acetylornithine transaminase) (AOTA). (Os07t0461900-01)
Os07g0471300	112.978	24.6771	2.1948	4.6418e-05	0.003044	ARGONAUTE 18	Similar to Protein argonaute 18. (Os07t0471300-01)
Os07g0471900	40.3778	11.8118	1.7733	0.00040687	0.01634	basic helix-loop-helix protein 077	Helix-loop-helix DNA-binding domain containing protein. (Os07t0471900-00)
Os07g0474700	141.504	73.9261	0.93668	0.0002099	0.0098939		Similar to cDNA, clone: J090064H24, full insert sequence. (Os07t0474700-01)
Os07g0480800	503.323	852.965	-0.761	7.2274e-08	1.276e-05	XYLOGLUCAN ENDOTRANSGLUCOSYDASE/HYDROLASE 21	Cellulase (EC 3.2.1.4). (Os07t0480800-01)
Os07g0483500	75.2536	32.7312	1.2011	0.00058424	0.021709		Similar to Phosphoribosyltransferase (Fragment). (Os07t0483500-01);Similar to Phosphoribosyltransferase (Fragment). (Os07t0483500-02);Similar to Phosphoribosyltransferase (Fragment). (Os07t0483500-03)
Os07g0510833	40.3898	128.665	-1.6716	1.3932e-05	0.0011677		Similar to L-ascorbate oxidase. (Os07t0510833-00)
Os07g0510900	682.226	946.573	-0.47247	0.00047724	0.018566		Similar to L-ascorbate oxidase. (Os07t0510900-01)
Os07g0511400	74.4774	0	Inf	8.9294e-26	1.0248e-22		Hypothetical protein. (Os07t0511400-01)
Os07g0538000	147.329	10.6435	3.791	0.0016897	0.047789		Similar to hydrolase, hydrolyzing O-glycosyl compounds. (Os07t0538000-01)
Os07g0540000	441.894	686.288	-0.63511	0.0001461	0.0075551		Similar to Wax synthase isoform 1. (Os07t0540000-00)
Os07g0586800	240.23	118.292	1.0221	1.641e-06	0.0001943		Similar to triacylglycerol lipase. (Os07t0586800-01)
Os07g0600200	66.459	16.3561	2.0226	1.1013e-06	0.00013976		Conserved hypothetical protein. (Os07t0600200-01)
Os07g0603300	153.117	257.928	-0.75234	0.00080762	0.02773	Grain Length on Chromosome 7, grain width QTL on chromosome 7	TON1 RECRUIT MOTIF (TRM)-containing protein, Regulation of grain size and shape (Os07t0603300-01)
Os07g0606800	62.5172	154.121	-1.3017	2.2116e-06	0.00024901		Alpha/beta hydrolase fold-3 domain containing protein. (Os07t0606800-01)
Os07g0613000	38.4557	12.242	1.6514	0.0010269	0.033078		RelA/SpoT protein domain containing protein. (Os07t0613000-01)
Os07g0616200	2166.61	2904.13	-0.42266	0.00026134	0.011744		Similar to Beta-ketoacyl-ACP synthase. (Os07t0616200-01)
Os07g0617700	210.783	90.4028	1.2213	0.00014221	0.007418	F-box protein 397	Cyclin-like F-box domain containing protein. (Os07t0617700-01)
Os07g0618000	20.5123	2.019	3.3448	0.00011283	0.0061661		Conserved hypothetical protein. (Os07t0618000-01)
Os07g0625800	1055.84	1398.62	-0.40561	0.0012783	0.038645	non-specific lipid transfer protein-like AGP 7, non-specific lipid transfer protein-like arabinogalactan protein 7, GPI-anchored non-specific lipid transfer protein 21, type G nsLTP 21, type G non-specific lipid transfer protein 21	Plant lipid transfer protein/Par allergen family protein. (Os07t0625800-01);Plant lipid transfer protein/Par allergen family protein. (Os07t0625800-02)
Os07g0633100	196.587	71.6816	1.4555	3.6117e-07	5.4427e-05		Similar to Glucan endo-1,3-beta-glucosidase 4. (Os07t0633100-01);Similar to Glucan endo-1,3-beta-glucosidase 4. (Os07t0633100-02);Similar to Glucan endo-1,3-beta-glucosidase 4. (Os07t0633100-03);Similar to Glucan endo-1,3-beta-glucosidase 4. (Os07t0633100-04);Similar to Glucan endo-1,3-beta-glucosidase 4. (Os07t0633100-05)
Os07g0634400	233.886	34.4102	2.7649	6.0401e-05	0.0037862		HAD-superfamily hydrolase, subfamily IA, variant 3 domain containing protein. (Os07t0634400-01)
Os07g0634900	74.9837	173.819	-1.2129	5.7037e-07	7.8542e-05	myb transcription factor 86, transcription factor MYB86	Hypothetical conserved gene. (Os07t0634900-00)
Os07g0638100	455.345	657.958	-0.53104	0.00031569	0.013534		Six-bladed beta-propeller, TolB-like domain containing protein. (Os07t0638100-01)
Os07g0656900	325.992	555.188	-0.76814	3.6026e-05	0.0025174	SERINE CARBOXYPEPTIDASE 40	Similar to Serine carboxypepsidase (Fragment). (Os07t0656900-00)
Os07g0669700	76.7402	188.273	-1.2948	7.8144e-06	0.00071253	HIGH-AFFINITY POTASSIUM(K+) TRANSPORTER 7	Potassium transporter 4 (AtPOT4) (AtKUP3) (AtKT4). (Os07t0669700-01)
Os07g0670300	13.3827	0	Inf	2.881e-05	0.0021121		C2 calcium-dependent membrane targeting domain containing protein. (Os07t0670300-01)
Os07g0672700	7.50374	45.0052	-2.5844	1.0519e-06	0.0001347		UDP-glucuronosyl/UDP-glucosyltransferase family protein. (Os07t0672700-00)
Os07g0673000	222.95	404.443	-0.85922	6.0427e-07	8.2707e-05		Ureohydrolase domain containing protein. (Os07t0673000-01)
Os07g0674500	20.6582	1.9812	3.3823	0.00027488	0.012187		Pollen Ole e 1 allergen/extensin domain containing protein. (Os07t0674500-01)
Os07g0676600	2.95795	20.7648	-2.8115	0.00043571	0.017288	basic helix-loop-helix protein 163	Similar to DNA binding protein. (Os07t0676600-01)
Os07g0676900	512.406	1083.22	-1.08	4.4295e-06	0.00045263	class III peroxidase 109, peroxidase 2	Similar to Peroxidase (EC 1.11.1.7). (Os07t0676900-01)
Os07g0677300	36.8983	2.98888	3.6259	8.7525e-07	0.00011505	PEROXIDASE GX9	Peroxidase. (Os07t0677300-01)
Os07g0683900	6572.82	10716.7	-0.70527	0.00034159	0.014396	R40G2	Ricin B-related lectin domain containing protein. (Os07t0683900-01);Similar to Osr40g2 protein (Fragment). (Os07t0683900-02)
Os07g0684100	195.842	634.64	-1.6962	2.7253e-25	3.0118e-22		Similar to Thioredoxin-like 1. (Os07t0684100-01)
Os07g0685300	187.75	73.2879	1.3572	1.1716e-08	2.4109e-06		Similar to Phosphate starvation regulator protein (Regulatory protein of P- starvation acclimation response Psr1). (Os07t0685300-01)
Os07g0689600	26.0505	4.77399	2.448	0.000313	0.013496	NICOTIANAMINE SYNTHASE 3	Nicotianamine synthase 3 (EC 2.5.1.43) (S-adenosyl-L-methionine:S- adenosyl-L-methionine:S-adenosyl-methionine 3-amino-3- carboxypropyltransferase 3) (OsNAS3). (Os07t0689600-01)
Os07g0689800	335.003	626.101	-0.90222	3.5309e-06	0.00036709		Tetratricopeptide-like helical domain containing protein. (Os07t0689800-01)
Os07g0692200	228.485	129.102	0.82359	8.5177e-05	0.0049254		Uncharacterised protein family UPF0497, trans-membrane plant domain containing protein. (Os07t0692200-00)
Os08g0102000	33.3497	9.69398	1.7825	0.0013985	0.041479	SEROTONIN N-ACETYLTRANSFERASE-2	Serotonin N-acetyltransferase, Melatonin synthesis (Os08t0102000-01)
Os08g0102700	12.913	0.347277	5.2166	0.00020575	0.0097446		Harpin-induced 1 domain containing protein. (Os08t0102700-01);Harpin-induced 1 domain containing protein. (Os08t0102700-02);Harpin-induced 1 domain containing protein. (Os08t0102700-03);Harpin-induced 1 domain containing protein. (Os08t0102700-04);Harpin-induced 1 domain containing protein. (Os08t0102700-05)
Os08g0110500	284.835	422.857	-0.57004	0.00050875	0.019462	PUB15, Plant U-Box 15, plant U-box-containing protein 15, U-box protein 15	U-box/ARM repeat E3 ligase, Stress response, Regulation of cell death, Blast disease resistance (Os08t0110500-01)
Os08g0111200	204.321	393.243	-0.94458	6.6856e-08	1.1874e-05		Beta-glucosidase, GBA2 type domain containing protein. (Os08t0111200-01);Similar to predicted protein. (Os08t0111200-02)
Os08g0119500	189.042	308.062	-0.70451	0.00022842	0.010583		Methyltransferase type 11 domain containing protein. (Os08t0119500-01)
Os08g0135900	296.363	499.205	-0.75227	0.00078169	0.026964	tryptophan synthase	Similar to Tryptophan synthase beta chain 1 (EC 4.2.1.20) (Orange pericarp 1) (Fragment). (Os08t0135900-01);Similar to Tryptophan synthase beta-subunit. (Os08t0135900-02);Similar to Tryptophan synthase beta-subunit. (Os08t0135900-03)
Os08g0141400	912.458	1243.15	-0.44617	0.00045133	0.017813		Similar to mRNA, clone: RTFL01-03-I20. (Os08t0141400-01)
Os08g0151500	304.178	202.015	0.59045	0.0013043	0.039271	-	-
Os08g0157500	874.124	315.245	1.4714	4.9055e-07	6.937e-05	O-METHYLTRANSFERASE 9	Caffeic acid O-methyltransferase, Flavonoid 3'-O-methyltransferase, Melatonin biosynthesis, Tricin biosynthesis (Os08t0157500-01);Similar to Quercetin 3-O-methyltransferase 1. (Os08t0157500-02)
Os08g0160500	192.011	325.642	-0.7621	2.9831e-05	0.0021657	CELLULOSE SYNTHASE LIKE F6	MLG (mixed-linkage glucan) synthase, Biosynthesis of MLG (cell wall polysaccharide) (Os08t0160500-01);Similar to Cellulose synthase-like CslF6. (Os08t0160500-02)
Os08g0168700	308.062	562.842	-0.86951	2.8668e-08	5.4138e-06		Similar to cytokinin-O-glucosyltransferase 2. (Os08t0168700-00)
Os08g0185701	126.157	68.5415	0.88017	0.0010335	0.033194	-	-
Os08g0189300	29.9157	2.67576	3.4829	1.5591e-06	0.00018815	GERMIN-LIKE PROTEIN 8-4	Germin-like protein 8-4, Disease resistance (Os08t0189300-01)
Os08g0191200	261.499	446.51	-0.77189	7.5046e-05	0.0044695		Pre-ATP-grasp fold domain containing protein. (Os08t0191200-01)
Os08g0195400	712.456	457.949	0.63761	0.00048861	0.018848		Protein of unknown function DUF3778 domain containing protein. (Os08t0195400-01)
Os08g0200100	146.449	346.025	-1.2405	3.8513e-09	8.9081e-07		Ribonucleotide reductase-related domain containing protein. (Os08t0200100-01)
Os08g0205400	649.259	417.996	0.6353	0.00021668	0.010134		Heavy metal transport/detoxification protein domain containing protein. (Os08t0205400-01)
Os08g0240200	159.746	0	Inf	3.3088e-16	2.1939e-13		Conserved hypothetical protein. (Os08t0240200-01)
Os08g0242700	530.954	739.911	-0.47876	0.00069858	0.024785		Similar to uridylyltransferase-related. (Os08t0242700-01);Similar to uridylyltransferase-related. (Os08t0242700-02)
Os08g0246800	2612.76	1707.7	0.61352	2.1943e-07	3.4279e-05		Conserved hypothetical protein. (Os08t0246800-01);Hypothetical conserved gene. (Os08t0246800-02)
Os08g0248700	104.319	54.4164	0.93888	0.001201	0.036755		Similar to Blind. (Os08t0248700-01)
Os08g0249200	22.352	3.35437	2.7363	0.00035336	0.014767		Similar to GDU1. (Os08t0249200-00)
Os08g0249300	521.917	727.454	-0.47904	0.00071192	0.02501		Hypothetical protein. (Os08t0249300-00)
Os08g0249400	172.473	96.4467	0.83857	0.00073814	0.02573		Hypothetical conserved gene. (Os08t0249400-01)
Os08g0280200	141.489	72.9145	0.95641	0.0001948	0.0093001		Tensin phosphatase, C2 domain domain containing protein. (Os08t0280200-01);Similar to Formin-like protein 6. (Os08t0280200-02);Hypothetical conserved gene. (Os08t0280200-03)
Os08g0331000	285.046	51.2402	2.4758	3.0945e-12	1.2824e-09		Conserved hypothetical protein. (Os08t0331000-01)
Os08g0331800	86.2717	6.24808	3.7874	3.0132e-12	1.2663e-09		Conserved hypothetical protein. (Os08t0331800-01)
Os08g0331900	123.006	34.1663	1.8481	0.0010406	0.033315		Similar to Leucine Rich Repeat family protein, expressed. (Os08t0331900-01)
Os08g0356800	46.0146	11.7043	1.9751	0.00012389	0.0066009		Protein of unknown function DUF247, plant family protein. (Os08t0356800-01)
Os08g0357300	676.796	250.523	1.4338	4.8554e-05	0.0031358	b-ZIP TRANSCRIPTION FACTOR 65	Conserved hypothetical protein. (Os08t0357300-01)
Os08g0358050	71.7585	3.44226	4.3817	3.7709e-12	1.5413e-09	-	-
Os08g0397800	307.693	547.079	-0.83026	1.2579e-07	2.096e-05		Conserved hypothetical protein. (Os08t0397800-01)
Os08g0402500	187.054	351.612	-0.91053	6.199e-05	0.0038534		Protein of unknown function DUF761, plant domain containing protein. (Os08t0402500-01)
Os08g0407600	515.976	712.194	-0.46497	0.0011539	0.035641		Protein of unknown function DUF581 family protein. (Os08t0407600-01)
Os08g0412700	69.497	17.3095	2.0054	0.00046349	0.018173		Protein of unknown function DUF1262 family protein. (Os08t0412700-01)
Os08g0432800	427.851	282.239	0.60019	0.00022949	0.0106	basic helix-loop-helix protein 038	Similar to BHLH transcription activator Ivory seed. (Os08t0432800-01)
Os08g0441500	109.283	15.4866	2.819	3.4848e-11	1.1302e-08	cinnamoyl-CoA reductase, cinnamoyl CoA reductase 20	Similar to Cinnamoyl-CoA reductase. (Os08t0441500-01);Similar to cinnamoyl CoA reductase. (Os08t0441500-02)
Os08g0452100	143.519	237.601	-0.7273	0.00035565	0.014821	Subtilisin 56, SUBTILISIN 56	Similar to Subtilisin-like serine protease. (Os08t0452100-00)
Os08g0452500	126.356	57.2493	1.1422	2.6291e-05	0.001976	SMALL AUXIN-UP RNA 33	Auxin responsive SAUR protein family protein. (Os08t0452500-01);Auxin responsive SAUR protein family protein. (Os08t0452500-02)
Os08g0452900	146.529	83.022	0.81963	0.00084182	0.028641	DnaJ domain protein C62	Similar to Chaperone protein dnaJ. (Os08t0452900-01)
Os08g0487800	278.49	518.126	-0.89568	0.00024702	0.011184		Similar to Heat-shock protein precursor. (Os08t0487800-01)
Os08g0487900	176.13	89.6398	0.97443	2.8921e-05	0.0021148		Esterase/lipase/thioesterase domain containing protein. (Os08t0487900-01)
Os08g0501900	154.353	86.6931	0.83224	0.00060591	0.022265	-	-
Os08g0505900	456.162	669.734	-0.55404	0.00015398	0.0078004	POLYGALACTURONASE-INHIBITING PROTEIN 6	Leucine-rich repeat (LRR) protein, Inhibitor of fungal polygalacturonase, Defence response (Os08t0505900-01)
Os08g0511700	227.816	382.274	-0.74674	0.0002657	0.011886	PYRICULARIA ORYZAE RESISTANCE 55-1	Similar to PSR9 (Fragment). (Os08t0511700-00)
Os08g0514100	586.896	975.979	-0.73375	9.4428e-08	1.6381e-05		Legume lectin, beta chain domain containing protein. (Os08t0514100-01)
Os08g0520700	1205.26	799.548	0.59208	6.6111e-05	0.0040176		Hypothetical protein. (Os08t0520700-01);Hypothetical protein. (Os08t0520700-02);Non-protein coding transcript. (Os08t0520700-03)
Os08g0523200	100.511	40.2297	1.321	2.0779e-05	0.0016231		Similar to MAB1. (Os08t0523200-00)
Os08g0525600	6346.22	8307.61	-0.38854	0.00038502	0.015652	FK506 binding protein 62a, FK506 binding protein 64	Similar to Peptidylprolyl isomerase; FK506-binding protein. (Os08t0525600-01)
Os08g0543400	851.242	1339.61	-0.65417	0.00070391	0.024925		Transferase family protein. (Os08t0543400-01);Transferase family protein. (Os08t0543400-02);Similar to anthranilate N-benzoyltransferase protein 1. (Os08t0543400-03)
Os08g0543900	507.829	783.21	-0.62506	8.4045e-06	0.00075082	b-ZIP TRANSCRIPTION FACTOR 68	Similar to Transcription factor RF2b. (Os08t0543900-00)
Os08g0550500	509.617	330.088	0.62656	7.6766e-05	0.0045538		Similar to Glutathione s-transferase (Fragment). (Os08t0550500-01)
Os08g0560500	120.434	347.451	-1.5286	1.4725e-05	0.0012171	SERINE CARBOXYPEPTIDASE 41	Peptidase S10, serine carboxypeptidase family protein. (Os08t0560500-01)
Os08g0561500	509.264	279.176	0.86724	0.00115	0.035641	USUALLY MULTIPLE ACIDS MOVE IN AND OUT TRANSPORTER 12	Similar to nodulin-like protein 5NG4. (Os08t0561500-01)
Os08g0562600	323.251	621.806	-0.94381	2.0913e-05	0.0016292		C2 calcium-dependent membrane targeting domain containing protein. (Os08t0562600-03)
Os09g0111100	408.289	264.478	0.62645	0.00017107	0.0084999	CYCLIN-D3-1	Cyclin D domain containing protein. (Os09t0111100-01)
Os09g0247500	294.654	133.019	1.1474	4.7025e-09	1.0402e-06		Conserved hypothetical protein. (Os09t0247500-01)
Os09g0258000	593.247	357.598	0.7303	0.0015935	0.045938		Cellular retinaldehyde-binding/triple function, C-terminal domain containing protein. (Os09t0258000-01);Similar to predicted protein. (Os09t0258000-02)
Os09g0272000	114.906	21.3459	2.4284	1.5873e-10	4.5541e-08		Heavy metal transport/detoxification protein domain containing protein. (Os09t0272000-01)
Os09g0279000	399.199	562.066	-0.49363	0.0011594	0.035775		Similar to r-interacting factor1. (Os09t0279000-01)
Os09g0286600	942.587	635.743	0.56818	3.7787e-05	0.0025919	SUBMERGENCE 1C	Pathogenesis-related transcriptional factor and ERF domain containing protein. (Os09t0286600-01);Pathogenesis-related transcriptional factor and ERF domain containing protein. (Os09t0286600-02);Pathogenesis-related transcriptional factor and ERF domain containing protein. (Os09t0286600-03)
Os09g0297400	6550.6	8914.98	-0.4446	0.00024309	0.011112	PHOSPHOENOLPYRUVATE/PHOSPHATE TRANSLOCATOR 1	Similar to Phosphate/phosphoenolpyruvate translocator. (Os09t0297400-01)
Os09g0306500	80.6613	37.6405	1.0996	0.001009	0.032617		Similar to DVL6/RTFL16 (ROTUNDIFOLIA LIKE 16). (Os09t0306500-00)
Os09g0309500	1102.55	1569.64	-0.50959	4.7745e-05	0.0030966		Conserved hypothetical protein. (Os09t0309500-01)
Os09g0315050	152.09	63.4778	1.2606	0.00047993	0.018646		Similar to Endoribonuclease Dicer homolog 2b. (Os09t0315050-00)
Os09g0346500	45.0815	412.611	-3.1942	9.0822e-50	2.4636e-46	CHLOROPHYLL A/B BINDING PROTEIN 1R	Similar to Chlorophyll a-b binding protein, chloroplast precursor (LHCII type I CAB) (LHCP). (Os09t0346500-04)
Os09g0347550	266.447	467.742	-0.81186	0.00031537	0.013534		Hypothetical protein. (Os09t0347550-00)
Os09g0362800	285.561	169.705	0.75077	8.1535e-05	0.0047703		Hypothetical conserved gene. (Os09t0362800-01);Peptidase M1, alanine aminopeptidase/leukotriene A4 hydrolase domain containing protein. (Os09t0362800-02)
Os09g0364800	156.631	46.0913	1.7648	0.00066776	0.024093		Heavy metal transport/detoxification protein domain containing protein. (Os09t0364800-01)
Os09g0367900	305.464	576.085	-0.91528	5.6187e-09	1.2237e-06		Conserved hypothetical protein. (Os09t0367900-01);Hypothetical conserved gene. (Os09t0367900-02)
Os09g0369400	7.41536	64.9826	-3.1315	0.0013464	0.040133	TREHALOSE-6-PHOSPHATE PHOSHPHATASE 7	Similar to predicted protein. (Os09t0369400-01)
Os09g0371100	286.105	135.279	1.0806	4.8716e-08	8.8095e-06		Similar to hydrogen symporter. (Os09t0371100-00)
Os09g0380000	250.083	396.79	-0.66597	8.2833e-05	0.0048273		Similar to catalytic/ ligase. (Os09t0380000-01);Similar to catalytic/ ligase. (Os09t0380000-02)
Os09g0381100	472.241	329.471	0.51937	0.001061	0.033823		Xanthine/uracil/vitamin C permease family protein. (Os09t0381100-01);Xanthine/uracil/vitamin C permease family protein. (Os09t0381100-02);Similar to Permease I. (Os09t0381100-03)
Os09g0382200	350.428	220.782	0.6665	0.0015333	0.044547	-	-
Os09g0394300	104.101	207.181	-0.9929	8.6173e-06	0.00076753	glycoside hydrolase OsGH9B11	Glycoside hydrolase, family 9 protein. (Os09t0394300-01)
Os09g0396900	321.623	146.85	1.131	1.1034e-05	0.00095151	Vacuolar Iron Transporter 2	Protein of unknown function DUF125, transmembrane family protein. (Os09t0396900-01);Vacuolar membrane transporter, Fe and Zn translocation between flag leaves and seeds (Os09t0396900-02)
Os09g0397300	876.623	1426.71	-0.70267	4.1032e-08	7.5637e-06		HAD-superfamily hydrolase subfamily IIB protein. (Os09t0397300-01)
Os09g0401300	1444.96	1883.34	-0.38226	0.0017288	0.048617	TIFY GENE 6B	Tify domain containing protein. (Os09t0401300-01);Similar to ZIM motif family protein. (Os09t0401300-02);Similar to ZIM motif family protein. (Os09t0401300-03)
Os09g0413600	64.4355	28.346	1.1847	0.0016844	0.04773		Ribosomal protein L34e domain containing protein. (Os09t0413600-01);Hypothetical conserved gene. (Os09t0413600-02)
Os09g0432300	140.321	270.886	-0.94896	5.8086e-06	0.00056639		Similar to AAA-type ATPase family protein. (Os09t0432300-01)
Os09g0434500	411.018	698.945	-0.76598	0.00050581	0.019374	ETHYLENE RESPONSE FACTOR 72	Similar to Ethylene response factor 2. (Os09t0434500-01)
Os09g0437500	31.3716	8.67174	1.8551	0.0014147	0.041836		Dormancyauxin associated family protein. (Os09t0437500-01)
Os09g0441400	620.69	169.562	1.8721	9.5045e-05	0.005361		Similar to Elicitor-inducible cytochrome P450. (Os09t0441400-01)
Os09g0446350	15.9959	44.4893	-1.4758	0.0012976	0.039109		Hypothetical conserved gene. (Os09t0446350-01)
Os09g0450300	130.958	50.4227	1.377	1.0025e-06	0.00013006		MAP65/ASE1 family protein. (Os09t0450300-01);MAP65/ASE1 family protein. (Os09t0450300-02);Microtubule-associated protein MAP65-1a. (Os09t0450300-03)
Os09g0452200	1630.29	2342.37	-0.52284	1.0345e-05	0.00090252	lysin motif-containing protein 4, lysin motif (LysM)-containing protein 4, LysM-containing protein 4	Lysin motif-containing protein, Pattern recognition receptor, Peptidoglycan and chitin perception in innate immunity (Os09t0452200-01);Similar to LysM-domain GPI-anchored protein 1 precursor. Splice isoform 2. (Os09t0452200-02)
Os09g0471800	111.014	40.5413	1.4533	7.8565e-05	0.0046324	WALL-ASSOCIATED KINASE GENE 85	Similar to WAK80 - OsWAK receptor-like protein kinase. (Os09t0471800-01)
Os09g0474300	272.153	447.5	-0.71747	1.1517e-05	0.00098751	74.8 KDA CLASS I HEAT SHOCK PROTEIN	Similar to Heat-shock protein precursor. (Os09t0474300-01)
Os09g0478300	99.5431	400.215	-2.0074	5.191e-09	1.1389e-06	CELLULOSE SYNTHASE LIKE E6	Similar to Cellulose synthase-like protein E6. (Os09t0478300-01)
Os09g0480600	175.398	49.4711	1.826	2.5244e-12	1.076e-09		Conserved hypothetical protein. (Os09t0480600-01)
Os09g0484800	71.4352	14.1134	2.3396	1.23e-08	2.5138e-06		Similar to Pirin-like protein. (Os09t0484800-01)
Os09g0487900	1291.3	1840.64	-0.51139	3.3713e-05	0.0024065	basic helix-loop-helix protein 143	Helix-loop-helix DNA-binding domain containing protein. (Os09t0487900-01)
Os09g0489500	19.6434	2.61838	2.9073	0.00062303	0.022782	b-ZIP TRANSCRIPTION FACTOR 74	Similar to Transcription factor HBP-1b(C38) (Fragment). (Os09t0489500-01);Similar to DNA binding protein. (Os09t0489500-02)
Os09g0498500	135.223	300.461	-1.1518	0.00017393	0.0085516		NAD-binding site containing protein. (Os09t0498500-00)
Os09g0500900	41.6517	10.3166	2.0134	9.7647e-05	0.0054767		Protein of unknown function DUF568 domain containing protein. (Os09t0500900-01)
Os09g0503400	2012.74	2608.33	-0.37396	0.0013889	0.041235		Leucyl-tRNA synthetase, class Ia, archaeal/eukaryotic cytosolic domain containing protein. (Os09t0503400-01);Valyl/Leucyl/Isoleucyl-tRNA synthetase, class I, anticodon-binding domain containing protein. (Os09t0503400-02)
Os09g0512700	527.035	763.857	-0.5354	0.00015092	0.0077112	Fes1-like gene	Armadillo-like helical domain containing protein. (Os09t0512700-01)
Os09g0517100	97.8953	174.132	-0.83087	0.00093858	0.031018		NB-ARC domain containing protein. (Os09t0517100-01);Hypothetical conserved gene. (Os09t0517100-02)
Os09g0518332	292.491	193.937	0.5928	0.0017465	0.048759		Hypothetical protein. (Os09t0518332-00)
Os09g0521300	2.58747	65.7516	-4.6674	1.0923e-16	7.7019e-14	TEOSINTE BRANCHED/CYCLOIDEA/PROLIFERATING CELL FACTOR 25	Similar to TCP family transcription factor. (Os09t0521300-00)
Os09g0524800	708.227	1039.46	-0.55355	4.7786e-05	0.0030966	BCL-2-ASSOCIATED ATHANOGENE 1	Apoptosis regulator Bcl-2 protein, BAG domain containing protein. (Os09t0524800-01);Apoptosis regulator Bcl-2 protein, BAG domain containing protein. (Os09t0524800-02)
Os09g0525600	311.341	452.713	-0.5401	0.00081585	0.027917		UBX domain containing protein. (Os09t0525600-01);Similar to UBX domain-containing protein. (Os09t0525600-02);Similar to UBX domain-containing protein. (Os09t0525600-03)
Os09g0527700	179.797	78.9891	1.1866	6.1254e-07	8.3456e-05	IAA26	Similar to Auxin-induced protein IAA4. (Os09t0527700-01)
Os09g0528200	229.657	394.532	-0.78066	0.00011145	0.0061016	HOMEOBOX GENE 6	Similar to Homeobox-leucine zipper protein HOX6. (Os09t0528200-01);Similar to Homeobox-leucine zipper protein HOX6. (Os09t0528200-02)
Os09g0533200	500.914	835.487	-0.73806	1.5142e-07	2.4824e-05		Glycoside hydrolase, family 17 domain containing protein. (Os09t0533200-00)
Os09g0533300	1368.57	1786.78	-0.3847	0.0015282	0.044487		Metallophosphoesterase domain containing protein. (Os09t0533300-01)
Os09g0535400	896.373	271.712	1.722	5.794e-30	9.099e-27		Curculin-like (mannose-binding) lectin domain containing protein. (Os09t0535400-00)
Os09g0542100	467.24	281.21	0.73252	1.8044e-05	0.0014434		Peptidase A1 domain containing protein. (Os09t0542100-01)
Os09g0542500	41.2018	86.3757	-1.0679	0.00094079	0.031018		Domain of unknown function DUF632 domain containing protein. (Os09t0542500-00)
Os09g0543400	35.4657	6.36147	2.479	0.00086023	0.029036	ORNITHINE DECARBOXYLASE A	Ornithine decarboxylase (EC 4.1.1.17). (Os09t0543400-00)
Os09g0543900	840.576	582.659	0.52873	0.0016876	0.047774	PUTRESCINE HYDROXYCINNAMOYL TRANSFERASE 3	Transferase family protein. (Os09t0543900-01);Transferase family protein. (Os09t0543900-02)
Os09g0558000	108.066	176.663	-0.70909	0.0017071	0.048192	protein phosphatase 2C70, protein phosphatase 2C 70, protein phosphatase 110	Similar to Protein phosphatase type-2C. (Os09t0558000-01)
Os09g0565300	341.505	154.371	1.1455	0.00055059	0.020665		Similar to RING-finger protein. (Os09t0565300-01)
Os09g0567800	538.433	953.034	-0.82376	6.5739e-05	0.0040176	GDSL ESTERASE/LIPASE PROTEIN 101	Hypothetical conserved gene. (Os09t0567800-00)
Os09g0569151	1.62479	64.9401	-5.3208	3.0934e-18	2.3667e-15		Hypothetical protein. (Os09t0569151-00)
Os09g0569200	72.6698	503.414	-2.7923	3.4601e-47	7.3745e-44		Similar to Beta-amylase (EC 3.2.1.2) (1,4-alpha-D-glucan maltohydrolase). (Os09t0569200-01)
Os10g0104500	314.572	454.079	-0.52955	0.0011254	0.035162	OsWD40-175	Similar to Notchless-related. (Os10t0104500-01);Hypothetical conserved gene. (Os10t0104500-02)
Os10g0113100	5.00103	35.6353	-2.833	3.2609e-06	0.0003426		Aldo/keto reductase family protein. (Os10t0113100-01);Similar to cDNA clone:J033143K18, full insert sequence. (Os10t0113100-02)
Os10g0114850	109.071	52.3627	1.0587	0.00027291	0.012139	-	-
Os10g0140700	2246.11	1348.95	0.7356	1.1912e-09	2.8897e-07		Hypothetical conserved gene. (Os10t0140700-00)
Os10g0142600	184.605	2.68669	6.1025	2.2423e-49	5.5754e-46	WALL-ASSOCIATED KINASE GENE 101	Protein kinase, catalytic domain domain containing protein. (Os10t0142600-00)
Os10g0155100	1444.39	784.142	0.88127	1.5764e-06	0.00018815		Curculin-like (mannose-binding) lectin domain containing protein. (Os10t0155100-01)
Os10g0160100	2085.54	2759.23	-0.40385	0.00061151	0.022443		Glycoside hydrolase, family 17 protein. (Os10t0160100-01);Glycoside hydrolase, family 17 protein. (Os10t0160100-02)
Os10g0189600	195.42	350.932	-0.84461	2.5192e-05	0.001903		Pyridoxal phosphate-dependent transferase, major region, subdomain 1 domain containing protein. (Os10t0189600-01);Pyridoxal phosphate-dependent transferase, major region, subdomain 1 domain containing protein. (Os10t0189600-02)
Os10g0330000	16.2486	1.63757	3.3107	0.0007623	0.026448		Conserved hypothetical protein. (Os10t0330000-01)
Os10g0362300	892.587	609.671	0.54996	6.609e-05	0.0040176	HISTIDINE KINASE 5	Similar to Histidine kinase 3. (Os10t0362300-01);Similar to Histidine kinase. (Os10t0362300-02);Histidine kinase, Cytokinin signaling (Os10t0362300-03);Histidine kinase, Cytokinin signaling (Os10t0362300-04)
Os10g0363650	459.681	300.082	0.61528	0.00015666	0.0079226	-	-
Os10g0376200	178.695	336.636	-0.9137	1.3959e-06	0.00017211		Leucine-rich repeat, typical subtype containing protein. (Os10t0376200-01)
Os10g0390600	68.7784	127.614	-0.89176	0.00063308	0.023064	ALANINE AMINOTRANSFERASE 4	Similar to Alanine aminotransferase 2 (EC 2.6.1.2) (GPT) (Glutamic--pyruvic transaminase 2) (Glutamic--alanine transaminase 2) (ALAAT-2). (Os10t0390600-01)
Os10g0390701	174.21	60.5171	1.5254	3.9922e-09	9.163e-07		Conserved hypothetical protein. (Os10t0390701-00)
Os10g0390800	37.8915	6.31639	2.5847	0.00053316	0.020218	ETHYLENE RESPONSE FACTOR 59	Similar to Ethylene-responsive transcription factor 3 (Ethylene-responsive element binding factor 3) (EREBP-3) (AtERF3). (Os10t0390800-01)
Os10g0394000	18.3102	0.701839	4.7054	1.5128e-05	0.0012401	GDSL ESTERASE/LIPASE PROTEIN 106	Similar to GDSL-like Lipase/Acylhydrolase family protein, expressed. (Os10t0394000-01)
Os10g0395000	98.8301	31.3408	1.6569	4.0987e-07	5.995e-05	RECEPTOR-LIKE CYTOPLASMIC KINASE 298	Protein kinase, core domain containing protein. (Os10t0395000-01)
Os10g0404900	631.119	1104.9	-0.80793	7.2236e-06	0.00067232	HOMEOBOX GENE 23	Similar to HAHB-5 (Fragment). (Os10t0404900-01)
Os10g0450400	104.23	30.7072	1.7631	0.00012117	0.006491		Protein of unknown function DUF594 family protein. (Os10t0450400-01)
Os10g0462900	2507.46	4700.51	-0.90659	4.2072e-09	9.5102e-07		Similar to mitochondrial chaperonin-60. (Os10t0462900-01);Similar to mitochondrial chaperonin-60. (Os10t0462900-02)
Os10g0491100	194.931	301.181	-0.62767	0.00071073	0.02501		Hypothetical conserved gene. (Os10t0491100-01)
Os10g0499400	482.673	659.84	-0.45107	0.0017084	0.048192		Cystathionine beta-synthase, core domain containing protein. (Os10t0499400-01)
Os10g0502500	681.169	464.425	0.55257	0.00014515	0.0075319	MEMBRANE STEROID BINDING PROTEIN 1	Cytochrome b5 domain containing protein. (Os10t0502500-04)
Os10g0512800	1241.82	1629.39	-0.39187	0.0016027	0.046114	RING finger protein OsRFPHC-10, RING-HC protein 10, SKIP interacting protein 13, SKIPa-interacting protein 13, SKIPa-interacting protein 13	Similar to predicted protein. (Os10t0512800-01)
Os10g0513200	2026.53	2834.33	-0.484	3.4092e-05	0.002422	NOD26 LIKE INTRINSIC PROTEIN 3;1	Boric acid channel, Regulation of boron distribution (Os10t0513200-01)
Os10g0516500	2177.7	2946.03	-0.43597	0.00020302	0.0096461		Conserved hypothetical protein. (Os10t0516500-01)
Os10g0523100	310.26	522.014	-0.75061	2.2786e-06	0.00025559		Isopenicillin N synthase family protein. (Os10t0523100-01);Isopenicillin N synthase family protein. (Os10t0523100-02)
Os10g0527800	139.331	38.4308	1.8582	2.2786e-10	6.2953e-08	TAU GLUTATHIONE S-TRANSFERASE 12	Similar to Tau class GST protein 3. (Os10t0527800-01)
Os10g0528300	402.565	271.122	0.57028	0.0011528	0.035641	TAU GLUTATHIONE S-TRANSFERASE 4	Tau class GST protein 4. (Os10t0528300-01)
Os10g0539600	120.905	202.146	-0.74153	0.00077424	0.026748	SPREADING STUB	Similar to Calcium-dependent protein kinase 3. (Os10t0539600-01)
Os10g0551200	575.751	347.428	0.72873	2.037e-06	0.00023288		Similar to Scl1 protein (Fragment). (Os10t0551200-01)
Os10g0551800	494.886	1723.05	-1.7998	0.00017337	0.0085506	root-specific RCc2, hybrid proline- or glycine-rich protein 13	Root-specific protein (RCc2 protein). (Os10t0551800-00)
Os10g0552700	450.954	1477.29	-1.7119	5.5191e-06	0.00054171	hybrid proline- or glycine-rich protein 19	Similar to Tumor-related protein (Fragment). (Os10t0552700-01)
Os10g0552800	7275.62	15096.7	-1.0531	2.0324e-10	5.6677e-08	hybrid proline- or glycine-rich protein 20	Similar to Tfm5 protein. (Os10t0552800-01)
Os10g0556100	3483.83	5284.3	-0.60104	1.0105e-07	1.7329e-05	BETA-EXPANSIN 4	Similar to beta-expansin EXPB4. (Os10t0556100-01);Similar to beta-expansin EXPB4. (Os10t0556100-02);Similar to Expansin-B4. (Os10t0556100-03)
Os10g0565150	556.744	1764.23	-1.664	1.6788e-07	2.7223e-05	BETA-AMYLASE 6	Hypothetical gene. (Os10t0565150-01)
Os10g0566400	36.076	8.20395	2.1366	0.00011788	0.0063835		Similar to RING-H2 finger protein ATL3J. (Os10t0566400-01)
Os10g0567400	29.1239	77.3682	-1.4095	5.9523e-05	0.0037628	chlorophyll a oxygenase, Chlorophyll a oxygenase 1, Lls1-homologue of maize, 3, 8-divinyl chlorophyllide a 8-vinyl reductase	Similar to Rieske. (Os10t0567400-01);Similar to Isoform 2 of Chlorophyllide a oxygenase, chloroplastic. (Os10t0567400-02);Similar to Isoform 2 of Chlorophyllide a oxygenase, chloroplastic. (Os10t0567400-03)
Os10g0567900	23.2156	2.74771	3.0788	8.1924e-05	0.0047837		Similar to F-box protein interaction domain containing protein, expressed. (Os10t0567900-01)
Os10g0571200	4281.27	5895.16	-0.46149	3.1165e-05	0.0022516		Similar to Pyruvate kinase isozyme G, chloroplast (EC 2.7.1.40) (Fragment). (Os10t0571200-01);Similar to Pyruvate kinase. (Os10t0571200-02)
Os11g0104400	4520.16	6254.15	-0.46844	0.00032867	0.01399	OMEGA-3 FATTY ACID DESATURASE 3	Similar to W-3 fatty acid desaturase. (Os11t0104400-01)
Os11g0108700	351.662	187.982	0.90359	4.5407e-07	6.4939e-05	LACCASE 21	Similar to Laccase-23. (Os11t0108700-00)
Os11g0111200	67.5313	23.5161	1.5219	0.00028848	0.012658		Conserved hypothetical protein. (Os11t0111200-01)
Os11g0112800	315.02	199.417	0.65965	0.0012347	0.037632		Saposin-like domain containing protein. (Os11t0112800-01)
Os11g0123600	29.0978	3.73216	2.9628	1.6728e-05	0.0013539		Hypothetical conserved gene. (Os11t0123600-00)
Os11g0124900	315.737	574.901	-0.86459	2.7221e-08	5.1734e-06		Glycosyl transferase, family 8 protein. (Os11t0124900-01)
Os11g0128700	894.329	1198.02	-0.42178	0.0011066	0.034902		Mad3/BUB1 homology region 1 domain containing protein. (Os11t0128700-00)
Os11g0135400	1927.1	2508.71	-0.38052	0.0013252	0.039723	60S acidic ribosomal protein	60S acidic ribosomal protein P0. (Os11t0135400-00)
Os11g0137000	55.3381	19.3212	1.5181	0.00053124	0.020193	PIN PROTEIN 1C	Similar to PIN1-like auxin transport protein. (Os11t0137000-01)
Os11g0141400	328.79	101.968	1.689	3.734e-17	2.7854e-14		Similar to EF hand family protein, expressed. (Os11t0141400-01)
Os11g0147150	81.2846	14.4593	2.491	2.5396e-10	6.8888e-08		Hypothetical gene. (Os11t0147150-00)
Os11g0149400	92.8343	47.6867	0.96107	0.0017745	0.0493	PHYTOSULFOKINE 2	Similar to Phytosulfokines 2 precursor. (Os11t0149400-01);Similar to cDNA clone:001-122-H04, full insert sequence. (Os11t0149400-02)
Os11g0152700	39.7915	10.7343	1.8902	0.00032947	0.014004	b-ZIP TRANSCRIPTION FACTOR 79	Similar to Transcription factor HBP-1b(C38) (Fragment). (Os11t0152700-01);Similar to Transcription factor HBP-1b(C38) (Fragment). (Os11t0152700-02)
Os11g0158500	1382.35	963.402	0.52091	0.00071237	0.02501	basic helix-loop-helix protein 151	Basic helix-loop-helix dimerisation region bHLH domain containing protein. (Os11t0158500-01)
Os11g0163100	6638.24	8803.2	-0.40723	0.00021371	0.010058		Similar to Actin 7 (Actin 2). (Os11t0163100-01)
Os11g0167800	344.064	92.8219	1.8901	0.0001524	0.0077598	ABSCISIC ACID-STRESS-RIPENING-INDUCIBLE 5 PROTEIN	Similar to Anth (Pollen-specific desiccation-associated LLA23 protein). (Os11t0167800-01)
Os11g0176200	381.275	692.532	-0.86105	0.00024351	0.011112	DOB1/SK12/helY-like DEAD-box Helicase	Similar to HUA enhancer 2. (Os11t0176200-01);Similar to predicted protein. (Os11t0176200-02)
Os11g0180000	40.7456	7.8116	2.383	9.7613e-06	0.00085413		Plant disease resistance response protein family protein. (Os11t0180000-01)
Os11g0186200	418.518	601.872	-0.52417	0.0003841	0.015635		Similar to Aldehyde dehydrogenase (EC 1.2.1.3). (Os11t0186200-01)
Os11g0195500	619.78	353.751	0.80902	0.0010078	0.032617	phytoalexin deficient 4	Hypothetical conserved gene. (Os11t0195500-01)
Os11g0199801	16.2572	1.39639	3.5413	0.00037555	0.015459		Conserved hypothetical protein. (Os11t0199801-00)
Os11g0210201	34.0459	4.00749	3.0867	1.7761e-06	0.00020864	RZ53	Conserved hypothetical protein. (Os11t0210201-00)
Os11g0249900	204.474	105.451	0.95534	0.0010625	0.033836		Protein kinase-like domain containing protein. (Os11t0249900-01);Similar to Protein kinase domain containing protein, expressed. (Os11t0249900-02)
Os11g0282700	54.1715	0	Inf	4.0598e-19	3.274e-16		Homeodomain-like containing protein. (Os11t0282700-01)
Os11g0284900	25.456	68.3629	-1.4252	0.00013831	0.0072681	GLUTATHIONE PEROXIDASE 5	Similar to Phospholipid hydroperoxide glutathione peroxidase (EC 1.11.1.9). (Os11t0284900-01)
Os11g0298400	1354.76	1805.55	-0.4144	0.00067945	0.024455		Protein of unknown function DUF663 domain containing protein. (Os11t0298400-01)
Os11g0300700	151.692	81.9076	0.88907	0.00024456	0.011141	RECEPTOR-LIKE CYTOPLASMIC KINASE 325	Similar to Protein kinase domain. (Os11t0300700-01)
Os11g0307300	255.341	396.731	-0.63574	0.00016172	0.0081233		Herbicide safener binding protein. (Os11t0307300-01)
Os11g0432900	45.0899	12.9277	1.8023	0.00018118	0.0087905	SERINE CARBOXYPEPTIDASE 56	Peptidase S10, serine carboxypeptidase family protein. (Os11t0432900-01);Similar to Serine carboxypeptidase. (Os11t0432900-02)
Os11g0441500	460.26	860.807	-0.90324	1.823e-10	5.1315e-08		UDP-glucuronosyl/UDP-glucosyltransferase family protein. (Os11t0441500-01)
Os11g0448000	449.784	638.448	-0.50534	0.0013355	0.03985		Protein kinase, catalytic domain domain containing protein. (Os11t0448000-00)
Os11g0455500	34819.8	49980	-0.52144	0.0015621	0.045286		Similar to Adenosylhomocysteinase. (Os11t0455500-01);Similar to Adenosylhomocysteinase. (Os11t0455500-02)
Os11g0473832	31.1127	110.669	-1.8307	4.785e-06	0.00048072		Similar to Serine decarboxylase. (Os11t0473832-00)
Os11g0491600	53.4004	0	Inf	5.3119e-13	2.4015e-10		Hypothetical conserved gene. (Os11t0491600-00)
Os11g0503900	0.324959	11.1892	-5.1057	0.000723	0.025261		Sulfotransferase family protein. (Os11t0503900-01)
Os11g0508600	367.397	31.4991	3.544	1.4307e-08	2.8845e-06	11N3	Sugar transporter, TAL effector-mediated susceptibility to bacterial pathogen (Os11t0508600-01)
Os11g0532200	256.588	137.982	0.89497	0.00038994	0.015744		Hypothetical protein. (Os11t0532200-01)
Os11g0539000	30.6645	114.831	-1.9049	8.4876e-10	2.1282e-07	OsSTA262	F-box domain, cyclin-like domain containing protein. (Os11t0539000-01)
Os11g0539200	1375.93	2921.74	-1.0864	1.7213e-19	1.4267e-16	XYLOGLUCAN ENDOTRANSGLUCOSYDASE/HYDROLASE 2	Similar to Xyloglucan endotransglycosylase XET2 (Fragment). (Os11t0539200-01)
Os11g0545300	1874.05	2614.79	-0.48053	4.3706e-05	0.002898	TOPOISOMERASE 6 SUBUNIT A-LIKE PROTEIN	Similar to Topoisomerase 6 subunit A-like protein. (Os11t0545300-01);Hypothetical gene. (Os11t0545300-02)
Os11g0546900	2816.64	2019.19	0.4802	4.5201e-05	0.0029846	G-BOX FACTOR 14-3-3D PROTEIN	Similar to TaWIN1. (Os11t0546900-01)
Os11g0554200	130.091	246.448	-0.92176	5.4858e-06	0.00054022		Conserved hypothetical protein. (Os11t0554200-01)
Os11g0557800	1014.4	1538.32	-0.60073	1.359e-06	0.00016825		Conserved hypothetical protein. (Os11t0557800-01)
Os11g0578100	475.296	260.081	0.86987	1.2295e-07	2.0611e-05	DnaJ domain protein C76	Heat shock protein DnaJ, N-terminal domain containing protein. (Os11t0578100-00)
Os11g0580000	373.96	521.025	-0.47847	0.0016493	0.046914		Similar to predicted protein. (Os11t0580000-01)
Os11g0600600	28.6109	4.30969	2.7309	5.6818e-05	0.0036225		Hypothetical conserved gene. (Os11t0600600-01)
Os11g0614400	202.557	343.115	-0.76037	0.00028004	0.012342	Patatin-related phospholipase A II theta	Similar to Patatin-like protein 1. (Os11t0614400-01)
Os11g0616700	54.9472	21.245	1.3709	0.00080016	0.027538		Hypothetical conserved gene. (Os11t0616700-00)
Os11g0629100	143.356	75.7551	0.92019	0.00042006	0.016734		Conserved hypothetical protein. (Os11t0629100-00)
Os11g0637200	39.4774	145.787	-1.8848	1.8865e-11	6.4702e-09		Similar to Sorbitol transporter. (Os11t0637200-01)
Os11g0637700	1951.99	2552.03	-0.3867	0.00095142	0.031177	RNA binding protein A	Nucleotide-binding, alpha-beta plait domain containing protein. (Os11t0637700-01);Nucleotide-binding, alpha-beta plait domain containing protein. (Os11t0637700-02);Similar to predicted protein. (Os11t0637700-03)
Os11g0643800	522.963	1130.56	-1.1123	2.4623e-05	0.0018808		Similar to Sugar transporter family protein, expressed. (Os11t0643800-01)
Os11g0648100	570.899	913.821	-0.67868	7.1518e-07	9.5266e-05		Kinesin, motor domain domain containing protein. (Os11t0648100-01)
Os11g0655300	109.147	228.669	-1.067	8.1631e-06	0.00073364		NB-ARC domain containing protein. (Os11t0655300-01)
Os11g0658800	177.415	368.585	-1.0549	4.6044e-09	1.033e-06		Pectin lyase fold/virulence factor domain containing protein. (Os11t0658800-01)
Os11g0673200	691.456	1081.28	-0.64503	1.5902e-06	0.00018904		Similar to Auxin-induced beta-glucosidase. (Os11t0673200-01)
Os11g0673600	36.081	0.694554	5.699	4.0718e-11	1.3064e-08	YR2, YR6, YR9, YR10, YR21, YR23	Similar to NB-ARC domain containing protein, expressed. (Os11t0673600-00)
Os11g0674400	224.954	1.60342	7.1323	7.7305e-63	3.8444e-59		Similar to NB-ARC domain containing protein, expressed. (Os11t0674400-00)
Os11g0676100	333.011	116.191	1.5191	1.3746e-14	7.7387e-12		Similar to NB-ARC domain containing protein, expressed. (Os11t0676100-00)
Os11g0676200	727.356	153.074	2.2484	5.8308e-42	1.0874e-38		Similar to NBS-LRR-like protein NBA2 (Fragment). (Os11t0676200-00)
Os11g0677000	75.1757	31.2993	1.2641	0.0003657	0.015113		Similar to NB-ARC domain containing protein, expressed. (Os11t0677000-00)
Os11g0686100	1736.18	2426.34	-0.48287	6.0136e-05	0.0037776		Conserved hypothetical protein. (Os11t0686100-01);Conserved hypothetical protein. (Os11t0686100-02)
Os11g0691600	21.9594	0.664044	5.0474	7.9504e-06	0.00071886		Similar to Protein kinase. (Os11t0691600-01)
Os11g0703100	701.684	127.985	2.4548	4.7123e-05	0.0030767		Thaumatin, pathogenesis-related family protein. (Os11t0703100-01)
Os12g0104400	4570.05	6624.91	-0.53569	1.8043e-06	0.00021029		Fatty acid desaturase, type 1 domain containing protein. (Os12t0104400-01)
Os12g0107700	410.051	603.512	-0.55758	0.0012661	0.038315		Similar to Leucine Rich Repeat family protein, expressed. (Os12t0107700-00)
Os12g0111600	226.557	418.715	-0.88609	9.6068e-05	0.0054038	Hypoxia-Induced Gene Domain 5, Hypoxia-Induced Gene Domain Protein 5	Hypoxia induced protein conserved region family protein. (Os12t0111600-01)
Os12g0112000	362.592	60.622	2.5804	0.0002064	0.0097601	PEROXIDASE	Similar to Peroxidase precursor (EC 1.11.1.7) (Fragment). (Os12t0112000-01)
Os12g0117600	223.939	133.057	0.75106	0.00026873	0.012003		BTB domain containing protein. (Os12t0117600-01)
Os12g0133800	23.6128	2.68669	3.1357	6.7857e-05	0.0041069	PIN PROTEIN 1D	Similar to Auxin efflux carrier. (Os12t0133800-01)
Os12g0136500	222.853	129.357	0.78473	0.00018935	0.0090978	-	-
Os12g0138050	136.341	47.9914	1.5064	0.001256	0.038086		Similar to EF hand family protein, expressed. (Os12t0138050-00)
Os12g0147800	1025.81	684.298	0.58407	1.5052e-05	0.0012372	PHYTOSULFOKINE 3	Similar to Phytosulfokines 5 precursor (Secretory protein SH27A). (Os12t0147800-01)
Os12g0158600	181.546	90.3536	1.0067	8.2997e-05	0.0048274		TB2/DP1 and HVA22 related protein family protein. (Os12t0158600-00)
Os12g0163700	142.99	385.501	-1.4308	4.1666e-09	9.4903e-07		Similar to Actin 7 (Actin 2). (Os12t0163700-01)
Os12g0169300	65.8934	11.1282	2.5659	4.7063e-09	1.0402e-06		Conserved hypothetical protein. (Os12t0169300-00)
Os12g0175900	119.17	195.216	-0.71205	0.001006	0.032617		Similar to RNase P subunit p30 family protein. (Os12t0175900-00)
Os12g0183375	71.5518	143.674	-1.0057	0.0010588	0.033789	-	-
Os12g0190000	1439.31	2184.78	-0.60211	5.7121e-07	7.8542e-05	GDP-L-galactose phosphorylase	Similar to VTC2. (Os12t0190000-01);Similar to VTC2. (Os12t0190000-02)
Os12g0191150	433.01	302.611	0.51693	0.0015307	0.044515		Similar to soluble inorganic pyrophosphatase. (Os12t0191150-01)
Os12g0194600	511.44	899.862	-0.81514	1.0168e-08	2.1215e-06	b-ZIP TRANSCRIPTION FACTOR 85	Similar to DNA binding protein. (Os12t0194600-01);Similar to DNA binding protein. (Os12t0194600-02)
Os12g0203200	21.1352	1.71316	3.6249	6.4979e-05	0.0039894		Conserved hypothetical protein. (Os12t0203200-01)
Os12g0210500	101.981	36.6313	1.4771	1.9608e-05	0.0015478		Conserved hypothetical protein. (Os12t0210500-00)
Os12g0222800	36.5416	4.434	3.0429	8.3948e-07	0.00011083		Leucine-rich repeat, N-terminal domain containing protein. (Os12t0222800-00)
Os12g0227500	24.7713	131.647	-2.4099	2.0229e-08	3.945e-06		Similar to Beta-glucosidase aggregating factor. (Os12t0227500-00)
Os12g0230600	187.492	373.627	-0.99477	1.0493e-05	0.00091277		Protein of unknown function DUF1685 family protein. (Os12t0230600-01)
Os12g0249900	1158.63	612.211	0.92032	5.9572e-12	2.25e-09	RECEPTOR-LIKE CYTOPLASMIC KINASE 366	Protein kinase, core domain containing protein. (Os12t0249900-01)
Os12g0270900	234.038	368.045	-0.65314	0.00017397	0.0085516		Sulfotransferase family protein. (Os12t0270900-01);Similar to cDNA clone:J023121F12, full insert sequence. (Os12t0270900-02)
Os12g0278700	359.266	230.773	0.63858	0.001295	0.03907		Similar to cystinosin. (Os12t0278700-01);Similar to Cystinosin homolog. (Os12t0278700-02)
Os12g0285100	365.914	609.385	-0.73585	1.0731e-06	0.00013683		Hypothetical conserved gene. (Os12t0285100-01);Conserved hypothetical protein. (Os12t0285100-02);Conserved hypothetical protein. (Os12t0285100-03);Hypothetical conserved gene. (Os12t0285100-04)
Os12g0409000	1814.54	2428.97	-0.42074	0.00043776	0.017341	serine hydroxymethyltransferase 3	Similar to Serine hydroxymethyltransferase. (Os12t0409000-01)
Os12g0447000	278.895	163.962	0.76636	0.0010288	0.033078	-	-
Os12g0476200	230.577	27.1704	3.0851	5.658e-12	2.1644e-09	SWEET13	Sucrose transporter, TAL effector PthXo2-dependent disease susceptibility to bacterial pathogen (Os12t0476200-01)
Os12g0478400	136.55	32.746	2.06	1.5615e-05	0.001273	RECEPTOR-LIKE CYTOPLASMIC KINASE 368	EGF-type aspartate/asparagine hydroxylation site domain containing protein. (Os12t0478400-00)
Os12g0480200	127.942	216.818	-0.761	0.00098459	0.032105		Similar to H0321H01.14 protein. (Os12t0480200-01)
Os12g0481200	451.695	278.354	0.69843	0.00018521	0.0089276		Conserved hypothetical protein. (Os12t0481200-01)
Os12g0514100	1307.9	966.506	0.43641	0.00068978	0.024678		Ribosome associated membrane RAMP4 family protein. (Os12t0514100-01)
Os12g0528801	401.062	100.799	1.9923	1.1099e-16	7.7019e-14		Hypothetical gene. (Os12t0528801-01)
Os12g0529800	153.506	299.586	-0.96468	3.0925e-05	0.0022397		Hypothetical protein. (Os12t0529800-00)
Os12g0548401	681.386	1926.66	-1.4996	2.487e-16	1.6865e-13		Similar to Proteinase inhibitor. (Os12t0548401-01)
Os12g0548501	523.594	1273.24	-1.282	8.8613e-05	0.0050652		Similar to CI2C. (Os12t0548501-01)
Os12g0548700	328.78	796.919	-1.2773	0.00045095	0.017813		Similar to MPI. (Os12t0548700-01)
Os12g0551200	249.799	95.6271	1.3853	0.00030893	0.013405		Armadillo-like helical domain containing protein. (Os12t0551200-01);Similar to cDNA clone:001-124-E09, full insert sequence. (Os12t0551200-02);Hypothetical conserved gene. (Os12t0551200-03)
Os12g0554800	178.895	339.445	-0.92406	5.1664e-07	7.2035e-05		Similar to Polygalacturonase-like protein. (Os12t0554800-01)
Os12g0555600	2388.43	3258.08	-0.44796	0.00011771	0.0063835	NARROW LEAF AND DWARF 1	Cellulose synthase-like protein, Cell wall biosynthesis (Os12t0555600-01)
Os12g0571300	196.917	297.762	-0.59657	0.0013083	0.039352		Conserved hypothetical protein. (Os12t0571300-01)
Os12g0578400	241.088	117.708	1.0343	7.2316e-07	9.59e-05		Glycoside hydrolase family 79, N-terminal protein. (Os12t0578400-01)
Os12g0580600	260.966	166.178	0.65113	0.00076779	0.026577		Conserved hypothetical protein. (Os12t0580600-01)
Os12g0580900	75.4757	35.402	1.0922	0.001474	0.043247	protein phosphatase 2C78, protein phosphatase 2C 78, protein phosphatase 131	Similar to Protein phosphatase 2C-like protein. (Os12t0580900-01)
Os12g0586100	327.546	195.397	0.74529	4.689e-05	0.0030682	STRESS/ABA-ACTIVATED PROTEIN KINASE 9	Serine/threonine protein kinase, Abscisic acid (ABA)-activated protein kinase, Hyperosmotic stress response, ABA signal transduction (Os12t0586100-01)
Os12g0599625	60.7397	0	Inf	6.7879e-11	2.132e-08	-	-
Os12g0600701	3974.42	5487.83	-0.46549	3.3326e-05	0.0023846		Conserved hypothetical protein. (Os12t0600701-00)
Os12g0613500	2932.05	4257.21	-0.538	2.7832e-06	0.00030309	brassinosteroid receptor kinase (BRI1)-interacting protein 132, BRI1-interacting protein 132, brassinosteroid receptor kinase-interacting protein 132	SRP40, C-terminal domain containing protein. (Os12t0613500-01);Similar to SRP40, C-terminal domain containing protein, expressed. (Os12t0613500-02)
Os12g0614600	217.737	126.029	0.78883	0.00017751	0.0086688	BARREN INFLORESCENCE 2	Serine/threonine protein kinase domain containing protein. (Os12t0614600-01)
Os12g0618600	344.441	498.473	-0.53326	0.00063879	0.023244	HAP2 SUBUNIT OF CCAAT-BOX BINDING COMPLEX	Similar to Transcriptional activator HAP2. (Os12t0618600-01)
Os12g0620400	3958.54	3045.78	0.37816	0.00091724	0.030579	methyl-CpG binding domain protein, Methyl-CpG binding domain containing protein	Methyl-CpG DNA binding domain containing protein. (Os12t0620400-01);Similar to Brain acid soluble protein 1 (Fragment). (Os12t0620400-02);Methyl-CpG DNA binding domain containing protein. (Os12t0620400-04)
Os12g0621700	389.253	540.33	-0.47313	0.0016828	0.04773		Conserved hypothetical protein. (Os12t0621700-01)
Os12g0625000	290.396	158.087	0.8773	6.039e-06	0.00058174	CYSTEINE SYNTHASE 1	Similar to Cysteine synthase. (Os12t0625000-01)
Os12g0632800	25.1099	5.14814	2.2861	0.00072093	0.025245	receptor-like protein kinase HAIKU2	Protein kinase, catalytic domain domain containing protein. (Os12t0632800-00)
Os12g0636400	49.3604	18.4739	1.4179	0.0014343	0.042301		Similar to Epoxide hydrolase 2. (Os12t0636400-01)
Os12g0639500	127.46	26.9484	2.2418	0.00017935	0.008744		ATPase, AAA-type, core domain containing protein. (Os12t0639500-01)
